# Supplementary material
Source: PubMed Central journal article supplement (PMC3571334)
Supplement: MCB.00916-12_zmb999109854so1.pdf [file MCB.00916-12_zmb999109854so1.pdf]

## MacQuarrie Supplemental Material List

### Supplemental Figures

S1. MEF2C expression does not increase the microRNA miR-206 or the transcription factor JDP2.  
*Related to Figure 5.* **Pg. 2**

S2. The CpG island located at the transcription start site of *JDP2* is not differentially methylated between rhabdomyosarcoma cells and normal muscle cells.  
*Related to Figure 6.* **Pg. 3**

### Supplemental Tables

S1. Genes regulated during myogenesis.  
*Related to Figure 1.* **Pg. 4 - 76**

S2. Upregulated myogenic genes that are expressed at reduced levels in RD cells.  
*Related to Figure 3A.* **Pg. 77 - 94**

S3. Upregulated myogenic genes expressed at comparable levels in RD cells.  
*Related to Figure 3A.* **Pg. 95 - 103**

S4. Downregulated myogenic genes that are expressed at higher levels in RD cells.  
*Related to Figure 3A.* **Pg. 104 - 112**

S5. Downregulated myogenic genes expressed at comparable levels in RD cells.  
*Related to Figure 3A.* **Pg. 113 - 124**

S6. Locations and scores of regional differences in MyoD binding between RD and primary cells.  
*Related to Figure 3B.* **Pg. 125 - 127**

S7. Differentially expressed genes located in regions with regional MyoD ChIP-seq peak differences.  
*Related to Figure 3C.* **Pg. 128 - 129**

S8. Clinical information for the primary rhabdomyosarcoma patient samples and Reduced Representation Bisulfite Sequencing at the CpG shore in the promoter of *JDP2*.  
*Related to Figure 6 and Suppl Fig S2.* **Pg. 130**

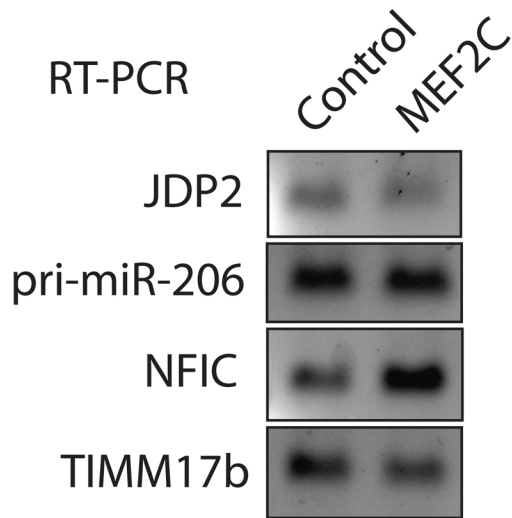

**Figure S1. MEF2C expression does not increase the microRNA miR-206 or the transcription factor JDP2.** RT-PCR for transcripts as indicated from RD cells either infected with an empty retrovirus (control) or one expressing MEF2C and placed in differentiation media for 36 h. TIMM17b serves as the internal control.

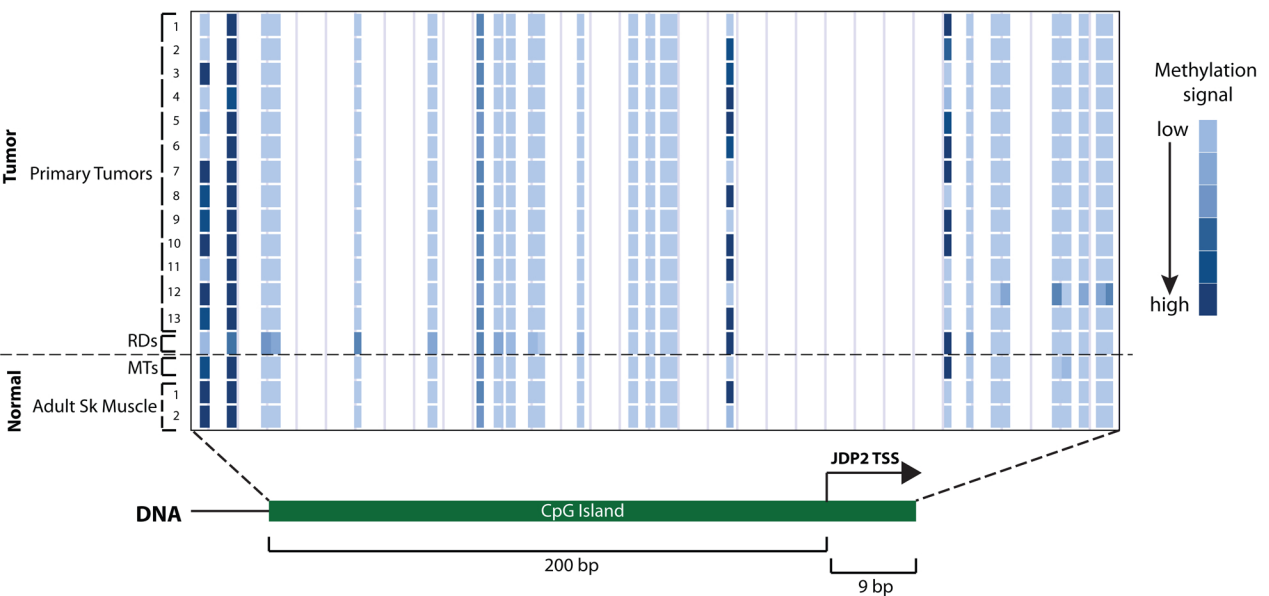

**Figure S2. The CpG island located at the transcription start site of *JDP2* is not differentially methylated between rhabdomyosarcoma cells and normal muscle cells.**

RRBS data as in Figure 6 from the 5' portion of the CpG island located at the *JDP2* transcription start site. As in Figure 6, a darker shade of blue coloration indicates a higher level of methylation. Genomic distances are indicated at the bottom of the figure.

**Supplemental Table S1. Genes regulated during myogenesis.**

| <b>Entrez ID</b> | <b>Symbol</b> | <b>Gene Name</b>                                           | <b>Myoblast value<sup>a</sup></b> | <b>Myotube value<sup>b</sup></b> | <b>Fold change<sup>c</sup></b> | <b>p-value</b> | <b>FDR</b>   |
|------------------|---------------|------------------------------------------------------------|-----------------------------------|----------------------------------|--------------------------------|----------------|--------------|
| 29895            | MYLPF         | myosin light chain, phosphorylatable, fast skeletal muscle | 6.26                              | 14.56                            | 7.57                           | 9.95<br>E-32   | 2.15<br>E-27 |
| 4621             | MYH3          | myosin, heavy chain 3, skeletal muscle, embryonic          | 6.49                              | 14.54                            | 7.40                           | 1.04<br>E-29   | 8.54<br>E-26 |
| 845              | CASQ2         | calsequestrin 2 (cardiac muscle)                           | 6.49                              | 13.80                            | 6.61                           | 1.19<br>E-29   | 8.54<br>E-26 |
| 4635             | MYL4          | myosin, light chain 4, alkali; atrial, embryonic           | 7.09                              | 13.99                            | 6.48                           | 3.38<br>E-29   | 1.46<br>E-25 |
| 4632             | MYL1          | myosin, light chain 1, alkali; skeletal, fast              | 6.43                              | 13.60                            | 6.46                           | 3.08<br>E-29   | 1.46<br>E-25 |
| 7134             | TNNC1         | troponin C type 1 (slow)                                   | 7.93                              | 14.56                            | 6.41                           | 1.50<br>E-27   | 4.64<br>E-24 |
| 58               | ACTA1         | actin, alpha 1, skeletal muscle                            | 6.44                              | 12.88                            | 5.83                           | 2.96<br>E-27   | 6.40<br>E-24 |
| 4626             | MYH8          | myosin, heavy chain 8, skeletal muscle, perinatal          | 6.30                              | 12.73                            | 5.78                           | 7.63<br>E-27   | 1.27<br>E-23 |
| 7125             | TNNC2         | troponin C type 2 (fast)                                   | 6.27                              | 12.43                            | 5.49                           | 4.31<br>E-26   | 4.91<br>E-23 |
| 7139             | TNNT2         | troponin T type 2 (cardiac)                                | 8.59                              | 14.24                            | 5.49                           | 2.19<br>E-25   | 1.75<br>E-22 |
| 4608             | MYBPH         | myosin binding protein H                                   | 7.98                              | 13.67                            | 5.44                           | 1.11<br>E-24   | 6.49<br>E-22 |
| 7140             | TNNT3         | troponin T type 3 (skeletal, fast)                         | 6.44                              | 12.26                            | 5.21                           | 9.54<br>E-26   | 9.82<br>E-23 |
| 348              | APOE          | apolipoprotein E                                           | 6.30                              | 12.09                            | 5.14                           | 2.17<br>E-25   | 1.75<br>E-22 |
| 7169             | TPM2          | tropomyosin 2 (beta)                                       | 8.28                              | 13.52                            | 5.06                           | 4.14<br>E-27   | 8.13<br>E-24 |
| 3270             | HRC           | histidine rich calcium binding protein                     | 6.55                              | 12.10                            | 4.99                           | 4.95<br>E-27   | 8.91<br>E-24 |
| 8988             | HSPB3         | heat shock 27kDa protein 3                                 | 8.40                              | 13.58                            | 4.99                           | 4.27<br>E-26   | 4.91<br>E-23 |
| 4656             | MYOG          | myogenin (myogenic factor 4)                               | 6.73                              | 12.06                            | 4.86                           | 1.48<br>E-24   | 8.00<br>E-22 |
| 55502            | HES6          | hairy and enhancer of split 6 (Drosophila)                 | 8.59                              | 13.32                            | 4.60                           | 2.30<br>E-25   | 1.77<br>E-22 |
| 6588             | SLN           | sarcolipin                                                 | 6.56                              | 11.65                            | 4.55                           | 1.36<br>E-24   | 7.53<br>E-22 |
| 6345             | SRL           | sarcalumenin                                               | 6.51                              | 11.61                            | 4.55                           | 2.01<br>E-26   | 2.90<br>E-23 |
| 58494            | JAM2          | junctional adhesion molecule 2                             | 7.58                              | 12.27                            | 4.49                           | 8.85<br>E-25   | 5.62<br>E-22 |

|        |         |                                                                    |      |       |      |              |              |
|--------|---------|--------------------------------------------------------------------|------|-------|------|--------------|--------------|
| 786    | CACNG1  | calcium channel, voltage-dependent, gamma subunit 1                | 6.56 | 11.56 | 4.47 | 7.56<br>E-24 | 2.94<br>E-21 |
| 347273 | MURC    | muscle-related coiled-coil protein                                 | 6.91 | 11.73 | 4.45 | 1.01<br>E-25 | 9.88<br>E-23 |
| 389827 | TMEM8C  | transmembrane protein 8C                                           | 6.70 | 11.60 | 4.43 | 3.73<br>E-24 | 1.61<br>E-21 |
| 1158   | CKM     | creatine kinase, muscle                                            | 7.13 | 11.83 | 4.40 | 1.06<br>E-25 | 9.95<br>E-23 |
| 4320   | MMP11   | matrix metallopeptidase 11 (stromelysin 3)                         | 7.41 | 11.90 | 4.26 | 4.04<br>E-25 | 2.81<br>E-22 |
| 80303  | EFHD1   | EF-hand domain family, member D1                                   | 7.82 | 12.21 | 4.22 | 1.15<br>E-21 | 1.90<br>E-19 |
| 2027   | ENO3    | enolase 3 (beta, muscle)                                           | 8.15 | 12.45 | 4.18 | 5.76<br>E-25 | 3.89<br>E-22 |
| 64397  | ZFP106  | zinc finger protein 106 homolog (mouse)                            | 8.85 | 13.04 | 4.10 | 2.43<br>E-19 | 2.04<br>E-17 |
| 4208   | MEF2C   | myocyte enhancer factor 2C                                         | 7.56 | 11.80 | 4.06 | 9.42<br>E-25 | 5.82<br>E-22 |
| 5919   | RARRES2 | retinoic acid receptor responder (tazarotene induced) 2            | 7.92 | 12.12 | 4.05 | 1.25<br>E-21 | 2.07<br>E-19 |
| 4625   | MYH7    | myosin, heavy chain 7, cardiac muscle, beta                        | 6.40 | 11.01 | 4.04 | 5.02<br>E-23 | 1.49<br>E-20 |
| 10777  | ARPP21  | cAMP-regulated phosphoprotein, 21kDa                               | 6.50 | 11.01 | 3.98 | 7.90<br>E-25 | 5.18<br>E-22 |
| 2162   | F13A1   | coagulation factor XIII, A1 polypeptide                            | 6.56 | 11.02 | 3.95 | 9.31<br>E-22 | 1.65<br>E-19 |
| 56961  | SHD     | Src homology 2 domain containing transforming protein D            | 7.14 | 11.32 | 3.92 | 3.93<br>E-25 | 2.81<br>E-22 |
| 8470   | SORBS2  | sorbin and SH3 domain containing 2                                 | 7.36 | 11.49 | 3.91 | 8.19<br>E-24 | 3.01<br>E-21 |
| 65055  | REEP1   | receptor accessory protein 1                                       | 6.47 | 10.89 | 3.87 | 6.24<br>E-24 | 2.59<br>E-21 |
| 10930  | APOBEC2 | apolipoprotein B mRNA editing enzyme, catalytic polypeptide-like 2 | 6.32 | 10.80 | 3.86 | 2.14<br>E-22 | 4.53<br>E-20 |
| 3488   | IGFBP5  | insulin-like growth factor binding protein 5                       | 6.88 | 11.05 | 3.81 | 1.30<br>E-20 | 1.59<br>E-18 |
| 252995 | FNDC5   | fibronectin type III domain containing 5                           | 8.06 | 11.99 | 3.81 | 3.41<br>E-20 | 3.78<br>E-18 |
| 114907 | FBXO32  | F-box protein 32                                                   | 7.27 | 11.24 | 3.76 | 9.18<br>E-21 | 1.20<br>E-18 |
| 5239   | PGM5    | phosphoglucomutase 5                                               | 6.53 | 10.83 | 3.75 | 3.04<br>E-24 | 1.43<br>E-21 |
| 222166 | C7orf41 | chromosome 7 open reading frame 41                                 | 8.76 | 12.52 | 3.71 | 1.86<br>E-22 | 4.10<br>E-20 |

|        |         |                                                             |      |       |      |      |      |
|--------|---------|-------------------------------------------------------------|------|-------|------|------|------|
| 6319   | SCD     | stearoyl-CoA desaturase (delta-9-desaturase)                | 9.68 | 13.43 | 3.66 | 1.56 | 5.11 |
|        |         |                                                             |      |       |      | E-23 | E-21 |
| 10324  | KBTBD10 | kelch repeat and BTB (POZ) domain containing 10             | 8.50 | 12.22 | 3.65 | 2.44 | 1.20 |
|        |         |                                                             |      |       |      | E-24 | E-21 |
| 8537   | BCAS1   | breast carcinoma amplified sequence 1                       | 6.38 | 10.59 | 3.62 | 6.41 | 2.59 |
|        |         |                                                             |      |       |      | E-24 | E-21 |
| 8736   | MYOM1   | myomesin 1, 185kDa                                          | 6.62 | 10.71 | 3.60 | 1.29 | 4.50 |
|        |         |                                                             |      |       |      | E-23 | E-21 |
| 7138   | TNNT1   | troponin T type 1 (skeletal, slow)                          | 6.60 | 10.69 | 3.57 | 1.53 | 2.44 |
|        |         |                                                             |      |       |      | E-21 | E-19 |
| 150572 | SMYD1   | SET and MYND domain containing 1                            | 6.48 | 10.60 | 3.57 | 1.50 | 1.82 |
|        |         |                                                             |      |       |      | E-20 | E-18 |
| 23676  | SMPX    | small muscle protein, X-linked                              | 6.28 | 10.47 | 3.57 | 2.63 | 8.37 |
|        |         |                                                             |      |       |      | E-23 | E-21 |
| 55615  | PRR5    | proline rich 5 (renal)                                      | 7.19 | 10.99 | 3.55 | 1.21 | 4.28 |
|        |         |                                                             |      |       |      | E-23 | E-21 |
| 1396   | CRIP1   | cysteine-rich protein 1 (intestinal)                        | 7.13 | 10.95 | 3.55 | 1.33 | 1.63 |
|        |         |                                                             |      |       |      | E-20 | E-18 |
| 3316   | HSPB2   | heat shock 27kDa protein 2                                  | 8.53 | 12.13 | 3.53 | 2.97 | 6.00 |
|        |         |                                                             |      |       |      | E-22 | E-20 |
| 23294  | ANKS1A  | ankyrin repeat and sterile alpha motif domain containing 1A | 7.82 | 11.47 | 3.52 | 1.29 | 2.91 |
|        |         |                                                             |      |       |      | E-22 | E-20 |
| 1339   | COX6A2  | cytochrome c oxidase subunit VIa polypeptide 2              | 6.48 | 10.56 | 3.52 | 4.59 | 6.48 |
|        |         |                                                             |      |       |      | E-21 | E-19 |
| 6711   | SPTBN1  | spectrin, beta, non-erythrocytic 1                          | 6.44 | 10.53 | 3.51 | 1.13 | 1.89 |
|        |         |                                                             |      |       |      | E-21 | E-19 |
| 169611 | OLFML2A | olfactomedin-like 2A                                        | 7.62 | 11.27 | 3.50 | 5.94 | 8.18 |
|        |         |                                                             |      |       |      | E-21 | E-19 |
| 207107 | SFTA1P  | surfactant associated 1 (pseudogene)                        | 8.14 | 11.72 | 3.49 | 1.99 | 4.30 |
|        |         |                                                             |      |       |      | E-22 | E-20 |
| 274    | BIN1    | bridging integrator 1                                       | 9.87 | 13.35 | 3.40 | 3.46 | 6.86 |
|        |         |                                                             |      |       |      | E-22 | E-20 |
| 10457  | GPNMB   | glycoprotein (transmembrane) nmb                            | 7.77 | 11.27 | 3.38 | 2.04 | 1.78 |
|        |         |                                                             |      |       |      | E-19 | E-17 |
| 6261   | RYR1    | ryanodine receptor 1 (skeletal)                             | 6.49 | 10.42 | 3.38 | 2.62 | 5.39 |
|        |         |                                                             |      |       |      | E-22 | E-20 |
| 83937  | RASSF4  | Ras association (RalGDS/AF-6) domain family member 4        | 6.69 | 10.50 | 3.35 | 6.16 | 1.67 |
|        |         |                                                             |      |       |      | E-23 | E-20 |
| 4619   | MYH1    | myosin, heavy chain 1, skeletal muscle, adult               | 6.30 | 10.26 | 3.34 | 9.58 | 2.38 |
|        |         |                                                             |      |       |      | E-23 | E-20 |
| 1837   | DTNA    | dystrobrevin, alpha                                         | 6.72 | 10.49 | 3.33 | 1.44 | 2.34 |
|        |         |                                                             |      |       |      | E-21 | E-19 |
| 4633   | MYL2    | myosin, light chain 2, regulatory, cardiac, slow            | 7.04 | 10.66 | 3.31 | 1.09 | 1.84 |
|        |         |                                                             |      |       |      | E-21 | E-19 |
| 7111   | TMOD1   | tropomodulin 1                                              | 6.45 | 10.32 | 3.29 | 1.49 | 5.04 |

|        |          |                                                              |       |       |      |      |      |
|--------|----------|--------------------------------------------------------------|-------|-------|------|------|------|
|        |          |                                                              |       |       |      | E-23 | E-21 |
| 79805  | VASH2    | vasohibin 2                                                  | 7.32  | 10.85 | 3.29 | 2.42 | 2.79 |
|        |          |                                                              |       |       |      | E-20 | E-18 |
| 64084  | CLSTN2   | calsyntenin 2                                                | 6.40  | 10.26 | 3.26 | 1.25 | 2.91 |
|        |          |                                                              |       |       |      | E-22 | E-20 |
| 2034   | EPAS1    | endothelial PAS domain protein 1                             | 8.02  | 11.36 | 3.26 | 1.35 | 8.96 |
|        |          |                                                              |       |       |      | E-18 | E-17 |
| 79933  | SYNPO2 L | synaptopodin 2-like                                          | 7.01  | 10.59 | 3.26 | 3.11 | 3.47 |
|        |          |                                                              |       |       |      | E-20 | E-18 |
| 83543  | AIF1L    | allograft inflammatory factor 1-like                         | 6.85  | 10.49 | 3.25 | 1.29 | 2.91 |
|        |          |                                                              |       |       |      | E-22 | E-20 |
| 633    | BGN      | biglycan                                                     | 7.09  | 10.63 | 3.25 | 1.08 | 1.01 |
|        |          |                                                              |       |       |      | E-19 | E-17 |
| 2348   | FOLR1    | folate receptor 1 (adult)                                    | 6.48  | 10.29 | 3.25 | 5.19 | 1.51 |
|        |          |                                                              |       |       |      | E-23 | E-20 |
| 84466  | MEGF10   | multiple EGF-like-domains 10                                 | 7.00  | 10.57 | 3.24 | 4.49 | 4.83 |
|        |          |                                                              |       |       |      | E-20 | E-18 |
| 2889   | RAPGEF 1 | Rap guanine nucleotide exchange factor (GEF) 1               | 9.11  | 12.38 | 3.22 | 6.23 | 8.41 |
|        |          |                                                              |       |       |      | E-21 | E-19 |
| 4130   | MAP1A    | microtubule-associated protein 1A                            | 7.72  | 11.07 | 3.21 | 4.79 | 6.72 |
|        |          |                                                              |       |       |      | E-21 | E-19 |
| 9518   | GDF15    | growth differentiation factor 15                             | 7.36  | 10.78 | 3.20 | 1.54 | 1.00 |
|        |          |                                                              |       |       |      | E-18 | E-16 |
| 1917   | EEF1A2   | eukaryotic translation elongation factor 1 alpha 2           | 6.55  | 10.27 | 3.18 | 1.13 | 1.05 |
|        |          |                                                              |       |       |      | E-19 | E-17 |
| 8912   | CACNA1 H | calcium channel, voltage-dependent, T type, alpha 1H subunit | 6.31  | 10.11 | 3.17 | 3.45 | 4.94 |
|        |          |                                                              |       |       |      | E-21 | E-19 |
| 9235   | IL32     | interleukin 32                                               | 9.16  | 12.35 | 3.17 | 5.36 | 7.48 |
|        |          |                                                              |       |       |      | E-21 | E-19 |
| 4703   | NEB      | nebulin                                                      | 6.42  | 10.17 | 3.16 | 1.73 | 2.05 |
|        |          |                                                              |       |       |      | E-20 | E-18 |
| 6664   | SOX11    | SRY (sex determining region Y)-box 11                        | 8.93  | 12.14 | 3.15 | 6.58 | 8.78 |
|        |          |                                                              |       |       |      | E-21 | E-19 |
| 1400   | CRMP1    | collapsin response mediator protein 1                        | 7.85  | 11.11 | 3.14 | 1.97 | 2.31 |
|        |          |                                                              |       |       |      | E-20 | E-18 |
| 4620   | MYH2     | myosin, heavy chain 2, skeletal muscle, adult                | 6.73  | 10.30 | 3.11 | 6.63 | 8.80 |
|        |          |                                                              |       |       |      | E-21 | E-19 |
| 148738 | HFE2     | hemochromatosis type 2 (juvenile)                            | 6.27  | 10.01 | 3.11 | 1.89 | 4.12 |
|        |          |                                                              |       |       |      | E-22 | E-20 |
| 30812  | SOX8     | SRY (sex determining region Y)-box 8                         | 7.03  | 10.45 | 3.11 | 9.71 | 2.39 |
|        |          |                                                              |       |       |      | E-23 | E-20 |
| 440    | ASNS     | asparagine synthetase (glutamine-hydrolyzing)                | 10.01 | 13.17 | 3.09 | 4.26 | 2.46 |
|        |          |                                                              |       |       |      | E-18 | E-16 |
| 134    | ADORA1   | adenosine A1 receptor                                        | 7.71  | 10.94 | 3.08 | 5.89 | 1.65 |
|        |          |                                                              |       |       |      | E-23 | E-20 |
| 88     | ACTN2    | actinin, alpha 2                                             | 6.65  | 10.18 | 3.04 | 2.20 | 1.88 |

|        |          |                                                                 |       |       |      |      |      |
|--------|----------|-----------------------------------------------------------------|-------|-------|------|------|------|
| 114299 | PALM2    | paralemmin 2                                                    | 6.85  | 10.27 | 3.03 | 8.41 | 1.53 |
|        |          |                                                                 |       |       |      | E-19 | E-17 |
|        |          |                                                                 |       |       |      | E-22 | E-19 |
| 134265 | AFAP1L1  | actin filament associated protein 1-like 1                      | 7.52  | 10.72 | 3.02 | 6.24 | 4.59 |
|        |          |                                                                 |       |       |      | E-19 | E-17 |
| 3911   | LAMA5    | laminin, alpha 5                                                | 8.13  | 11.19 | 3.00 | 4.61 | 3.51 |
|        |          |                                                                 |       |       |      | E-19 | E-17 |
| 5730   | PTGDS    | prostaglandin D2 synthase 21kDa (brain)                         | 7.42  | 10.61 | 2.99 | 2.17 | 3.28 |
|        |          |                                                                 |       |       |      | E-21 | E-19 |
| 29993  | PACSIN1  | protein kinase C and casein kinase substrate in neurons 1       | 6.59  | 10.09 | 2.98 | 6.23 | 1.67 |
|        |          |                                                                 |       |       |      | E-23 | E-20 |
| 245806 | VGLL2    | vestigial like 2 (Drosophila)                                   | 6.82  | 10.20 | 2.97 | 3.49 | 2.81 |
|        |          |                                                                 |       |       |      | E-19 | E-17 |
| 5129   | CDK18    | cyclin-dependent kinase 18                                      | 6.46  | 10.00 | 2.97 | 7.76 | 7.66 |
|        |          |                                                                 |       |       |      | E-20 | E-18 |
| 80206  | FHOD3    | formin homology 2 domain containing 3                           | 7.82  | 10.90 | 2.96 | 2.67 | 3.04 |
|        |          |                                                                 |       |       |      | E-20 | E-18 |
| 116496 | FAM129A  | family with sequence similarity 129, member A                   | 7.13  | 10.35 | 2.94 | 1.53 | 3.04 |
|        |          |                                                                 |       |       |      | E-13 | E-12 |
| 113451 | ADC      | arginine decarboxylase                                          | 6.88  | 10.18 | 2.91 | 1.04 | 1.80 |
|        |          |                                                                 |       |       |      | E-21 | E-19 |
| 859    | CAV3     | caveolin 3                                                      | 7.92  | 10.93 | 2.91 | 2.98 | 2.46 |
|        |          |                                                                 |       |       |      | E-19 | E-17 |
| 140465 | MYL6B    | myosin, light chain 6B, alkali, smooth muscle and non-muscle    | 11.33 | 14.38 | 2.90 | 2.90 | 5.91 |
|        |          |                                                                 |       |       |      | E-22 | E-20 |
| 84886  | C1orf198 | chromosome 1 open reading frame 198                             | 8.50  | 11.42 | 2.88 | 3.83 | 4.18 |
|        |          |                                                                 |       |       |      | E-20 | E-18 |
| 22924  | MAPRE3   | microtubule-associated protein, RP/EB family, member 3          | 6.94  | 10.18 | 2.88 | 3.76 | 2.22 |
|        |          |                                                                 |       |       |      | E-18 | E-16 |
| 57761  | TRIB3    | tribbles homolog 3 (Drosophila)                                 | 7.82  | 10.79 | 2.84 | 1.45 | 1.50 |
|        |          |                                                                 |       |       |      | E-10 | E-09 |
| 7130   | TNFAIP6  | tumor necrosis factor, alpha-induced protein 6                  | 7.41  | 10.43 | 2.81 | 2.47 | 1.18 |
|        |          |                                                                 |       |       |      | E-17 | E-15 |
| 58528  | RRAGD    | Ras-related GTP binding D                                       | 6.39  | 9.78  | 2.80 | 2.38 | 2.01 |
|        |          |                                                                 |       |       |      | E-19 | E-17 |
| 30061  | SLC40A1  | solute carrier family 40 (iron-regulated transporter), member 1 | 6.87  | 10.03 | 2.77 | 1.44 | 2.34 |
|        |          |                                                                 |       |       |      | E-21 | E-19 |
| 256691 | MAMDC2   | MAM domain containing 2                                         | 9.67  | 12.46 | 2.76 | 1.52 | 7.73 |
|        |          |                                                                 |       |       |      | E-17 | E-16 |
| 1028   | CDKN1C   | cyclin-dependent kinase inhibitor 1C (p57, Kip2)                | 6.53  | 9.82  | 2.75 | 2.39 | 1.47 |
|        |          |                                                                 |       |       |      | E-18 | E-16 |
| 5947   | RBP1     | retinol binding protein 1, cellular                             | 7.03  | 10.10 | 2.75 | 3.03 | 3.40 |
|        |          |                                                                 |       |       |      | E-20 | E-18 |
| 127294 | MYOM3    | myomesin family, member 3                                       | 6.45  | 9.76  | 2.74 | 2.67 | 3.04 |



|        |         |                                                                                 |       |       |      |              |              |
|--------|---------|---------------------------------------------------------------------------------|-------|-------|------|--------------|--------------|
|        |         |                                                                                 |       |       |      | E-20         | E-18         |
| 11145  | PLA2G16 | phospholipase A2, group XVI                                                     | 8.23  | 11.01 | 2.72 | 9.43<br>E-21 | 1.21<br>E-18 |
| 158471 | PRUNE2  | prune homolog 2 (Drosophila)                                                    | 8.63  | 11.37 | 2.72 | 6.45<br>E-16 | 2.23<br>E-14 |
| 23439  | ATP1B4  | ATPase, Na <sup>+</sup> /K <sup>+</sup> transporting, beta 4 polypeptide        | 6.42  | 9.72  | 2.72 | 9.46<br>E-20 | 9.21<br>E-18 |
| 221914 | GPC2    | glypican 2                                                                      | 7.91  | 10.72 | 2.70 | 3.27<br>E-21 | 4.71<br>E-19 |
| 7102   | TSPAN7  | tetraspanin 7                                                                   | 6.66  | 9.84  | 2.69 | 1.26<br>E-20 | 1.55<br>E-18 |
| 131377 | KBTBD5  | kelch repeat and BTB (POZ) domain containing 5                                  | 6.61  | 9.80  | 2.68 | 1.59<br>E-18 | 1.03<br>E-16 |
| 9260   | PDLIM7  | PDZ and LIM domain 7 (enigma)                                                   | 10.25 | 12.96 | 2.66 | 6.34<br>E-22 | 1.20<br>E-19 |
| 9459   | ARHGEF6 | Rac/Cdc42 guanine nucleotide exchange factor (GEF) 6                            | 9.09  | 11.78 | 2.66 | 1.16<br>E-20 | 1.45<br>E-18 |
| 26471  | NUPR1   | nuclear protein, transcriptional regulator, 1                                   | 8.45  | 11.15 | 2.66 | 1.76<br>E-18 | 1.12<br>E-16 |
| 488    | ATP2A2  | ATPase, Ca <sup>++</sup> transporting, cardiac muscle, slow twitch 2            | 9.11  | 11.77 | 2.65 | 1.46<br>E-17 | 7.48<br>E-16 |
| 477    | ATP1A2  | ATPase, Na <sup>+</sup> /K <sup>+</sup> transporting, alpha 2 polypeptide       | 6.29  | 9.53  | 2.62 | 1.60<br>E-21 | 2.48<br>E-19 |
| 25890  | ABI3BP  | ABI family, member 3 (NESH) binding protein                                     | 8.78  | 11.41 | 2.62 | 1.21<br>E-18 | 8.18<br>E-17 |
| 83729  | INHBE   | inhibin, beta E                                                                 | 6.50  | 9.66  | 2.61 | 1.01<br>E-10 | 1.09<br>E-09 |
| 1346   | COX7A1  | cytochrome c oxidase subunit VIIa polypeptide 1 (muscle)                        | 9.85  | 12.46 | 2.59 | 2.70<br>E-20 | 3.05<br>E-18 |
| 9891   | NUAK1   | NUAK family, SNF1-like kinase, 1                                                | 10.16 | 12.77 | 2.57 | 3.61<br>E-19 | 2.88<br>E-17 |
| 80144  | FRAS1   | Fraser syndrome 1                                                               | 6.72  | 9.75  | 2.57 | 3.69<br>E-17 | 1.63<br>E-15 |
| 6641   | SNTB1   | syntrophin, beta 1 (dystrophin-associated protein A1, 59kDa, basic component 1) | 8.08  | 10.74 | 2.56 | 1.06<br>E-20 | 1.34<br>E-18 |
| 254102 | EHBP1L1 | EH domain binding protein 1-like 1                                              | 8.62  | 11.19 | 2.56 | 1.32<br>E-18 | 8.84<br>E-17 |
| 7857   | SCG2    | secretogranin II                                                                | 7.07  | 9.92  | 2.54 | 1.52<br>E-19 | 1.38<br>E-17 |
| 10912  | GADD45G | growth arrest and DNA-damage-inducible, gamma                                   | 6.47  | 9.56  | 2.53 | 2.13<br>E-19 | 1.83<br>E-17 |
| 10611  | PDLIM5  | PDZ and LIM domain 5                                                            | 7.48  | 10.21 | 2.52 | 1.39         | 1.27         |

|        |          |                                                                   |      |       |      |      |      |
|--------|----------|-------------------------------------------------------------------|------|-------|------|------|------|
|        |          |                                                                   |      |       |      | E-19 | E-17 |
| 3983   | ABLIM1   | actin binding LIM protein 1                                       | 7.01 | 9.85  | 2.51 | 2.96 | 2.45 |
|        |          |                                                                   |      |       |      | E-19 | E-17 |
| 55608  | ANKRD10  | ankyrin repeat domain 10                                          | 7.53 | 10.23 | 2.50 | 4.81 | 2.71 |
|        |          |                                                                   |      |       |      | E-18 | E-16 |
| 9289   | GPR56    | G protein-coupled receptor 56                                     | 7.32 | 10.07 | 2.50 | 1.15 | 7.88 |
|        |          |                                                                   |      |       |      | E-18 | E-17 |
| 3482   | IGF2R    | insulin-like growth factor 2 receptor                             | 9.34 | 11.85 | 2.49 | 1.09 | 3.57 |
|        |          |                                                                   |      |       |      | E-15 | E-14 |
| 54510  | PCDH18   | protocadherin 18                                                  | 7.43 | 10.13 | 2.49 | 9.92 | 5.30 |
|        |          |                                                                   |      |       |      | E-18 | E-16 |
| 7412   | VCAM1    | vascular cell adhesion molecule 1                                 | 6.66 | 9.60  | 2.46 | 2.02 | 3.90 |
|        |          |                                                                   |      |       |      | E-13 | E-12 |
| 782    | CACNB1   | calcium channel, voltage-dependent, beta 1 subunit                | 6.37 | 9.42  | 2.46 | 2.07 | 1.79 |
|        |          |                                                                   |      |       |      | E-19 | E-17 |
| 56997  | ADCK3    | aarF domain containing kinase 3                                   | 7.31 | 10.00 | 2.45 | 1.16 | 7.88 |
|        |          |                                                                   |      |       |      | E-18 | E-17 |
| 59285  | CACNG6   | calcium channel, voltage-dependent, gamma subunit 6               | 6.78 | 9.64  | 2.44 | 8.53 | 6.06 |
|        |          |                                                                   |      |       |      | E-19 | E-17 |
| 8082   | SSPN     | sarcospan (Kras oncogene-associated gene)                         | 7.10 | 9.83  | 2.43 | 2.47 | 9.20 |
|        |          |                                                                   |      |       |      | E-16 | E-15 |
| 1152   | CKB      | creatine kinase, brain                                            | 7.99 | 10.54 | 2.43 | 6.98 | 3.85 |
|        |          |                                                                   |      |       |      | E-18 | E-16 |
| 5106   | PCK2     | phosphoenolpyruvate carboxykinase 2 (mitochondrial)               | 8.10 | 10.62 | 2.43 | 2.88 | 5.33 |
|        |          |                                                                   |      |       |      | E-13 | E-12 |
| 64115  | C10orf54 | chromosome 10 open reading frame 54                               | 6.71 | 9.60  | 2.43 | 8.26 | 2.78 |
|        |          |                                                                   |      |       |      | E-16 | E-14 |
| 2065   | ERBB3    | v-erb-b2 erythroblastic leukemia viral oncogene homolog 3 (avian) | 6.59 | 9.52  | 2.43 | 2.17 | 1.36 |
|        |          |                                                                   |      |       |      | E-18 | E-16 |
| 10966  | RAB40B   | RAB40B, member RAS oncogene family                                | 8.54 | 10.99 | 2.42 | 4.79 | 5.13 |
|        |          |                                                                   |      |       |      | E-20 | E-18 |
| 6840   | SVIL     | supervillin                                                       | 7.73 | 10.30 | 2.41 | 1.75 | 1.56 |
|        |          |                                                                   |      |       |      | E-19 | E-17 |
| 5413   | 5-Sep    | septin 5                                                          | 8.98 | 11.39 | 2.40 | 3.15 | 1.44 |
|        |          |                                                                   |      |       |      | E-17 | E-15 |
| 90441  | ZNF622   | zinc finger protein 622                                           | 9.97 | 12.38 | 2.39 | 6.13 | 4.52 |
|        |          |                                                                   |      |       |      | E-19 | E-17 |
| 28514  | DLL1     | delta-like 1 (Drosophila)                                         | 6.74 | 9.56  | 2.38 | 1.52 | 9.98 |
|        |          |                                                                   |      |       |      | E-18 | E-17 |
| 54937  | SOHLH2   | spermatogenesis and oogenesis specific basic helix-loop-helix 2   | 6.83 | 9.61  | 2.38 | 1.84 | 7.06 |
|        |          |                                                                   |      |       |      | E-16 | E-15 |
| 64207  | IRF2BPL  | interferon regulatory factor 2 binding protein-like               | 9.26 | 11.65 | 2.38 | 6.74 | 6.87 |
|        |          |                                                                   |      |       |      | E-20 | E-18 |
| 160622 | GRASP    | GRP1 (general receptor for phosphoinositides 1)-                  | 6.72 | 9.55  | 2.38 | 7.51 | 4.11 |

|        |          |                                                                                                           |       |       |      |              |              |
|--------|----------|-----------------------------------------------------------------------------------------------------------|-------|-------|------|--------------|--------------|
|        |          | associated scaffold protein                                                                               |       |       |      | E-18         | E-16         |
| 22808  | MRAS     | muscle RAS oncogene homolog                                                                               | 7.65  | 10.19 | 2.37 | 1.61<br>E-16 | 6.24<br>E-15 |
| 9024   | BRSK2    | BR serine/threonine kinase 2                                                                              | 6.85  | 9.61  | 2.37 | 3.77<br>E-19 | 2.97<br>E-17 |
| 768211 | RELL1    | RELT-like 1                                                                                               | 7.95  | 10.42 | 2.36 | 1.12<br>E-19 | 1.05<br>E-17 |
| 10486  | CAP2     | CAP, adenylate cyclase-associated protein, 2 (yeast)                                                      | 10.34 | 12.75 | 2.36 | 2.23<br>E-19 | 1.89<br>E-17 |
| 8326   | FZD9     | frizzled homolog 9 (Drosophila)                                                                           | 6.73  | 9.53  | 2.35 | 1.99<br>E-19 | 1.75<br>E-17 |
| 1306   | COL15A1  | collagen, type XV, alpha 1                                                                                | 6.38  | 9.32  | 2.35 | 1.63<br>E-14 | 4.09<br>E-13 |
| 4684   | NCAM1    | neural cell adhesion molecule 1                                                                           | 8.10  | 10.54 | 2.35 | 3.85<br>E-19 | 3.01<br>E-17 |
| 27242  | TNFRSF21 | tumor necrosis factor receptor superfamily, member 21                                                     | 7.84  | 10.30 | 2.33 | 8.30<br>E-19 | 5.92<br>E-17 |
| 7004   | TEAD4    | TEA domain family member 4                                                                                | 9.05  | 11.38 | 2.33 | 5.35<br>E-20 | 5.64<br>E-18 |
| 1410   | CRYAB    | crystallin, alpha B                                                                                       | 10.91 | 13.32 | 2.32 | 9.50<br>E-19 | 6.61<br>E-17 |
| 26353  | HSPB8    | heat shock 22kDa protein 8                                                                                | 7.66  | 10.14 | 2.31 | 1.16<br>E-19 | 1.07<br>E-17 |
| 377007 | KLHL30   | kelch-like 30 (Drosophila)                                                                                | 7.47  | 9.97  | 2.30 | 2.21<br>E-18 | 1.38<br>E-16 |
| 79007  | DBNDD1   | dysbindin (dystrobrevin binding protein 1) domain containing 1                                            | 7.95  | 10.36 | 2.30 | 9.86<br>E-20 | 9.47<br>E-18 |
| 8497   | PPFIA4   | protein tyrosine phosphatase, receptor type, f polypeptide (PTPRF), interacting protein (liprin), alpha 4 | 7.31  | 9.84  | 2.29 | 9.86<br>E-18 | 5.28<br>E-16 |
| 4088   | SMAD3    | SMAD family member 3                                                                                      | 8.61  | 10.92 | 2.28 | 3.16<br>E-17 | 1.44<br>E-15 |
| 9201   | DCLK1    | doublecortin-like kinase 1                                                                                | 6.84  | 9.51  | 2.28 | 3.18<br>E-19 | 2.61<br>E-17 |
| 347733 | TUBB2B   | tubulin, beta 2B                                                                                          | 7.00  | 9.59  | 2.27 | 2.12<br>E-19 | 1.83<br>E-17 |
| 8553   | BHLHE40  | basic helix-loop-helix family, member e40                                                                 | 9.60  | 11.88 | 2.27 | 2.12<br>E-16 | 8.12<br>E-15 |
| 26576  | SRPK3    | SRSF protein kinase 3                                                                                     | 7.21  | 9.73  | 2.26 | 1.66<br>E-19 | 1.49<br>E-17 |
| 5159   | PDGFRB   | platelet-derived growth factor receptor, beta polypeptide                                                 | 8.06  | 10.42 | 2.26 | 3.94<br>E-15 | 1.12<br>E-13 |
| 23095  | KIF1B    | kinesin family member 1B                                                                                  | 8.42  | 10.71 | 2.24 | 2.82         | 8.29         |

|        |           |                                                                                                 |       |       |      |              |              |
|--------|-----------|-------------------------------------------------------------------------------------------------|-------|-------|------|--------------|--------------|
|        |           |                                                                                                 |       |       |      | E-15         | E-14         |
| 3157   | HMGCS1    | 3-hydroxy-3-methylglutaryl-CoA synthase 1 (soluble)                                             | 9.24  | 11.47 | 2.23 | 8.57<br>E-11 | 9.35<br>E-10 |
| 8821   | INPP4B    | inositol polyphosphate-4-phosphatase, type II, 105kDa                                           | 8.45  | 10.72 | 2.22 | 3.47<br>E-18 | 2.08<br>E-16 |
| 8365   | HIST1H4H  | histone cluster 1, H4h                                                                          | 6.69  | 9.38  | 2.22 | 1.25<br>E-17 | 6.56<br>E-16 |
| 28227  | PPP2R3B   | protein phosphatase 2, regulatory subunit B", beta                                              | 7.63  | 10.01 | 2.22 | 1.55<br>E-19 | 1.40<br>E-17 |
| 1674   | DES       | desmin                                                                                          | 9.89  | 12.12 | 2.21 | 9.71<br>E-20 | 9.37<br>E-18 |
| 57159  | TRIM54    | tripartite motif containing 54                                                                  | 6.36  | 9.15  | 2.20 | 4.19<br>E-19 | 3.23<br>E-17 |
| 8028   | MLLT10    | myeloid/lymphoid or mixed-lineage leukemia (trithorax homolog, Drosophila); translocated to, 10 | 6.65  | 9.34  | 2.20 | 1.62<br>E-18 | 1.05<br>E-16 |
| 19     | ABCA1     | ATP-binding cassette, subfamily A (ABC1), member 1                                              | 6.48  | 9.22  | 2.20 | 1.94<br>E-14 | 4.75<br>E-13 |
| 8908   | GYG2      | glycogenin 2                                                                                    | 7.51  | 9.90  | 2.19 | 4.52<br>E-19 | 3.46<br>E-17 |
| 221662 | RBM24     | RNA binding motif protein 24                                                                    | 8.14  | 10.42 | 2.19 | 5.07<br>E-16 | 1.79<br>E-14 |
| 23433  | RHOQ      | ras homolog gene family, member Q                                                               | 9.78  | 11.98 | 2.19 | 2.64<br>E-18 | 1.61<br>E-16 |
| 26227  | PHGDH     | phosphoglycerate dehydrogenase                                                                  | 10.72 | 12.95 | 2.18 | 4.23<br>E-18 | 2.45<br>E-16 |
| 8349   | HIST2H2BE | histone cluster 2, H2be                                                                         | 7.18  | 9.61  | 2.17 | 2.88<br>E-16 | 1.07<br>E-14 |
| 9242   | MSC       | musculin                                                                                        | 7.42  | 9.79  | 2.17 | 1.74<br>E-17 | 8.64<br>E-16 |
| 11155  | LDB3      | LIM domain binding 3                                                                            | 6.58  | 9.25  | 2.16 | 4.13<br>E-16 | 1.50<br>E-14 |
| 2318   | FLNC      | filamin C, gamma                                                                                | 11.25 | 13.50 | 2.14 | 3.31<br>E-15 | 9.56<br>E-14 |
| 22801  | ITGA11    | integrin, alpha 11                                                                              | 7.51  | 9.85  | 2.14 | 7.69<br>E-16 | 2.62<br>E-14 |
| 11214  | AKAP13    | A kinase (PRKA) anchor protein 13                                                               | 7.89  | 10.16 | 2.14 | 5.55<br>E-14 | 1.24<br>E-12 |
| 56911  | C21orf7   | chromosome 21 open reading frame 7                                                              | 10.46 | 12.60 | 2.14 | 3.59<br>E-19 | 2.88<br>E-17 |
| 7453   | WARS      | tryptophanyl-tRNA synthetase                                                                    | 9.46  | 11.61 | 2.14 | 1.63<br>E-13 | 3.22<br>E-12 |
| 5565   | PRKAB2    | protein kinase, AMP-activated, beta 2 non-                                                      | 7.69  | 9.97  | 2.12 | 1.47<br>E-16 | 5.81<br>E-15 |

| catalytic subunit |          |                                                                                                 |       |       |      |              |              |
|-------------------|----------|-------------------------------------------------------------------------------------------------|-------|-------|------|--------------|--------------|
| 1030              | CDKN2B   | cyclin-dependent kinase inhibitor 2B (p15, inhibits CDK4)                                       | 7.18  | 9.56  | 2.12 | 6.53<br>E-17 | 2.76<br>E-15 |
| 94241             | TP53INP1 | tumor protein p53 inducible nuclear protein 1                                                   | 7.37  | 9.69  | 2.10 | 3.44<br>E-17 | 1.54<br>E-15 |
| 414325            | DEFB103A | defensin, beta 103A                                                                             | 7.00  | 9.41  | 2.09 | 4.32<br>E-13 | 7.67<br>E-12 |
| 57801             | HES4     | hairy and enhancer of split 4 (Drosophila)                                                      | 7.77  | 10.01 | 2.09 | 8.80<br>E-19 | 6.19<br>E-17 |
| 875               | CBS      | cystathionine-beta-synthase                                                                     | 8.14  | 10.32 | 2.09 | 9.11<br>E-15 | 2.40<br>E-13 |
| 8816              | DCAF5    | DDB1 and CUL4 associated factor 5                                                               | 7.78  | 10.00 | 2.08 | 3.91<br>E-18 | 2.29<br>E-16 |
| 404217            | CTXN1    | cortexin 1                                                                                      | 8.50  | 10.61 | 2.07 | 6.67<br>E-17 | 2.81<br>E-15 |
| 55714             | ODZ3     | odz, odd Oz/ten-m homolog 3 (Drosophila)                                                        | 8.64  | 10.74 | 2.06 | 6.26<br>E-16 | 2.17<br>E-14 |
| 58476             | TP53INP2 | tumor protein p53 inducible nuclear protein 2                                                   | 7.61  | 9.83  | 2.05 | 3.36<br>E-17 | 1.52<br>E-15 |
| 11341             | SCRG1    | stimulator of chondrogenesis 1                                                                  | 6.37  | 8.98  | 2.04 | 9.23<br>E-16 | 3.09<br>E-14 |
| 6720              | SREBF1   | sterol regulatory element binding transcription factor 1                                        | 6.99  | 9.36  | 2.03 | 4.69<br>E-17 | 2.05<br>E-15 |
| 57568             | SIPA1L2  | signal-induced proliferation-associated 1 like 2                                                | 6.47  | 9.05  | 2.03 | 1.07<br>E-16 | 4.34<br>E-15 |
| 10962             | MLLT11   | myeloid/lymphoid or mixed-lineage leukemia (trithorax homolog, Drosophila); translocated to, 11 | 10.83 | 12.92 | 2.03 | 9.76<br>E-19 | 6.76<br>E-17 |
| 89795             | NAV3     | neuron navigator 3                                                                              | 7.66  | 9.85  | 2.03 | 5.16<br>E-16 | 1.82<br>E-14 |
| 55616             | ASAP3    | ArfGAP with SH3 domain, ankyrin repeat and PH domain 3                                          | 8.08  | 10.19 | 2.00 | 1.86<br>E-17 | 9.07<br>E-16 |
| 4134              | MAP4     | microtubule-associated protein 4                                                                | 7.44  | 9.64  | 2.00 | 3.58<br>E-14 | 8.41<br>E-13 |
| 10193             | RNF41    | ring finger protein 41                                                                          | 7.86  | 9.99  | 1.99 | 3.71<br>E-17 | 1.64<br>E-15 |
| 80032             | ZNF556   | zinc finger protein 556                                                                         | 7.31  | 9.53  | 1.99 | 1.29<br>E-17 | 6.72<br>E-16 |
| 157285            | SGK223   | homolog of rat pragma of Rnd2                                                                   | 8.65  | 10.68 | 1.98 | 2.10<br>E-17 | 1.01<br>E-15 |
| 23499             | MACF1    | microtubule-actin crosslinking factor 1                                                         | 9.17  | 11.14 | 1.98 | 7.47<br>E-11 | 8.24<br>E-10 |
| 10217             | CTDSPL   | CTD (carboxy-terminal                                                                           | 9.13  | 11.10 | 1.98 | 1.44         | 9.50         |

|        |          |                                                                                            |       |       |      |              |              |
|--------|----------|--------------------------------------------------------------------------------------------|-------|-------|------|--------------|--------------|
|        |          | domain, RNA polymerase II, polypeptide A) small phosphatase-like                           |       |       |      | E-18         | E-17         |
| 22982  | DIP2C    | DIP2 disco-interacting protein 2 homolog C (Drosophila)                                    | 7.23  | 9.45  | 1.97 | 2.43<br>E-16 | 9.12<br>E-15 |
| 27254  | CSDC2    | cold shock domain containing C2, RNA binding                                               | 6.63  | 9.07  | 1.97 | 2.12<br>E-17 | 1.02<br>E-15 |
| 27295  | PDLIM3   | PDZ and LIM domain 3                                                                       | 10.67 | 12.65 | 1.96 | 4.18<br>E-17 | 1.84<br>E-15 |
| 4861   | NPAS1    | neuronal PAS domain protein 1                                                              | 6.86  | 9.20  | 1.96 | 3.41<br>E-17 | 1.53<br>E-15 |
| 389136 | VGLL3    | vestigial like 3 (Drosophila)                                                              | 7.62  | 9.74  | 1.96 | 3.33<br>E-15 | 9.62<br>E-14 |
| 10579  | TACC2    | transforming, acidic coiled-coil containing protein 2                                      | 8.41  | 10.42 | 1.96 | 3.01<br>E-17 | 1.39<br>E-15 |
| 1026   | CDKN1A   | cyclin-dependent kinase inhibitor 1A (p21, Cip1)                                           | 12.70 | 14.72 | 1.95 | 2.68<br>E-18 | 1.63<br>E-16 |
| 8140   | SLC7A5   | solute carrier family 7 (cationic amino acid transporter, y <sup>+</sup> system), member 5 | 10.76 | 12.76 | 1.95 | 3.28<br>E-15 | 9.52<br>E-14 |
| 79412  | KREMEN2  | kringle containing transmembrane protein 2                                                 | 6.84  | 9.18  | 1.95 | 1.69<br>E-18 | 1.09<br>E-16 |
| 3898   | LAD1     | ladinin 1                                                                                  | 6.71  | 9.09  | 1.94 | 5.60<br>E-18 | 3.14<br>E-16 |
| 54972  | TMEM132A | transmembrane protein 132A                                                                 | 7.60  | 9.70  | 1.94 | 1.50<br>E-17 | 7.61<br>E-16 |
| 388551 | CEACAM16 | carcinoembryonic antigen-related cell adhesion molecule 16                                 | 6.46  | 8.93  | 1.93 | 8.43<br>E-18 | 4.56<br>E-16 |
| 1307   | COL16A1  | collagen, type XVI, alpha 1                                                                | 7.77  | 9.84  | 1.93 | 4.98<br>E-17 | 2.16<br>E-15 |
| 51706  | CYB5R1   | cytochrome b5 reductase 1                                                                  | 10.41 | 12.35 | 1.92 | 1.79<br>E-17 | 8.81<br>E-16 |
| 7421   | VDR      | vitamin D (1,25-dihydroxyvitamin D3) receptor                                              | 6.77  | 9.11  | 1.92 | 5.89<br>E-18 | 3.28<br>E-16 |
| 22809  | ATF5     | activating transcription factor 5                                                          | 9.75  | 11.68 | 1.92 | 3.68<br>E-11 | 4.28<br>E-10 |
| 10188  | TNK2     | tyrosine kinase, non-receptor, 2                                                           | 9.10  | 11.01 | 1.91 | 1.67<br>E-17 | 8.37<br>E-16 |
| 10630  | PDPN     | podoplanin                                                                                 | 7.15  | 9.33  | 1.91 | 9.65<br>E-16 | 3.20<br>E-14 |
| 196740 | C10orf72 | chromosome 10 open reading frame 72                                                        | 6.84  | 9.13  | 1.91 | 5.14<br>E-17 | 2.23<br>E-15 |
| 246329 | STAC3    | SH3 and cysteine rich domain 3                                                             | 6.69  | 9.04  | 1.90 | 1.68<br>E-17 | 8.37<br>E-16 |

|        |         |                                                                                   |       |       |      |              |              |
|--------|---------|-----------------------------------------------------------------------------------|-------|-------|------|--------------|--------------|
| 6733   | SRPK2   | SRSF protein kinase 2                                                             | 6.84  | 9.13  | 1.90 | 1.21<br>E-16 | 4.86<br>E-15 |
| 10867  | TSPAN9  | tetraspanin 9                                                                     | 10.31 | 12.23 | 1.89 | 5.71<br>E-17 | 2.45<br>E-15 |
| 22885  | ABLIM3  | actin binding LIM protein family, member 3                                        | 8.61  | 10.55 | 1.89 | 4.74<br>E-18 | 2.69<br>E-16 |
| 3636   | INPPL1  | inositol polyphosphate phosphatase-like 1                                         | 9.24  | 11.12 | 1.89 | 7.85<br>E-16 | 2.66<br>E-14 |
| 26137  | ZBTB20  | zinc finger and BTB domain containing 20                                          | 7.45  | 9.53  | 1.88 | 8.39<br>E-12 | 1.12<br>E-10 |
| 9839   | ZEB2    | zinc finger E-box binding homeobox 2                                              | 7.87  | 9.88  | 1.88 | 1.04<br>E-14 | 2.71<br>E-13 |
| 116138 | KLHDC3  | kelch domain containing 3                                                         | 10.18 | 12.05 | 1.87 | 1.44<br>E-17 | 7.42<br>E-16 |
| 2170   | FABP3   | fatty acid binding protein 3, muscle and heart (mammary-derived growth inhibitor) | 6.54  | 8.92  | 1.87 | 4.90<br>E-14 | 1.11<br>E-12 |
| 694    | BTG1    | B-cell translocation gene 1, anti-proliferative                                   | 10.69 | 12.57 | 1.86 | 8.26<br>E-17 | 3.41<br>E-15 |
| 81618  | ITM2C   | integral membrane protein 2C                                                      | 9.27  | 11.12 | 1.86 | 7.08<br>E-17 | 2.97<br>E-15 |
| 5064   | PALM    | paralemmin                                                                        | 7.31  | 9.40  | 1.86 | 1.45<br>E-16 | 5.71<br>E-15 |
| 8128   | ST8SIA2 | ST8 alpha-N-acetylneuraminide alpha-2,8-sialyltransferase 2                       | 8.20  | 10.15 | 1.86 | 1.02<br>E-16 | 4.17<br>E-15 |
| 1512   | CTSH    | cathepsin H                                                                       | 7.23  | 9.33  | 1.85 | 1.16<br>E-15 | 3.73<br>E-14 |
| 9750   | FAM65B  | family with sequence similarity 65, member B                                      | 6.59  | 8.94  | 1.85 | 2.11<br>E-15 | 6.39<br>E-14 |
| 57556  | SEMA6A  | sema domain, transmembrane domain (TM), and cytoplasmic domain, (semaphorin) 6A   | 6.61  | 8.94  | 1.84 | 6.77<br>E-15 | 1.82<br>E-13 |
| 2817   | GPC1    | glypican 1                                                                        | 8.43  | 10.33 | 1.84 | 2.74<br>E-16 | 1.02<br>E-14 |
| 8611   | PPAP2A  | phosphatidic acid phosphatase type 2A                                             | 8.38  | 10.28 | 1.83 | 1.04<br>E-15 | 3.40<br>E-14 |
| 84075  | FSCB    | fibrous sheath CABYR binding protein                                              | 6.53  | 8.86  | 1.82 | 2.40<br>E-15 | 7.15<br>E-14 |
| 338773 | TMEM119 | transmembrane protein 119                                                         | 6.49  | 8.83  | 1.82 | 1.96<br>E-17 | 9.54<br>E-16 |
| 9499   | MYOT    | myotilin                                                                          | 6.59  | 8.90  | 1.82 | 2.35<br>E-15 | 7.01<br>E-14 |
| 23588  | KLHDC2  | kelch domain containing 2                                                         | 9.44  | 11.23 | 1.81 | 3.10<br>E-16 | 1.14<br>E-14 |
| 1831   | TSC22D3 | TSC22 domain family,                                                              | 8.99  | 10.82 | 1.80 | 2.33         | 1.11         |

|        |               |                                                                   |       |       |      |      |      |
|--------|---------------|-------------------------------------------------------------------|-------|-------|------|------|------|
|        |               | member 3                                                          |       |       |      | E-17 | E-15 |
| 54800  | KLHL24        | kelch-like 24 (Drosophila)                                        | 7.60  | 9.57  | 1.80 | 4.28 | 1.54 |
|        |               |                                                                   |       |       |      | E-16 | E-14 |
| 23710  | GABARA<br>PL1 | GABA(A) receptor-<br>associated protein like 1                    | 8.27  | 10.15 | 1.80 | 6.62 | 2.28 |
|        |               |                                                                   |       |       |      | E-16 | E-14 |
| 57722  | IGDCC4        | immunoglobulin<br>superfamily, DCC<br>subclass, member 4          | 6.92  | 9.06  | 1.80 | 5.53 | 1.94 |
|        |               |                                                                   |       |       |      | E-16 | E-14 |
| 23048  | FNBP1         | formin binding protein 1                                          | 8.32  | 10.19 | 1.79 | 4.80 | 1.72 |
|        |               |                                                                   |       |       |      | E-16 | E-14 |
| 8780   | RIOK3         | RIO kinase 3 (yeast)                                              | 9.67  | 11.45 | 1.79 | 1.09 | 5.73 |
|        |               |                                                                   |       |       |      | E-17 | E-16 |
| 5814   | PURB          | purine-rich element<br>binding protein B                          | 10.28 | 12.09 | 1.78 | 1.01 | 2.11 |
|        |               |                                                                   |       |       |      | E-13 | E-12 |
| 1649   | DDIT3         | DNA-damage-inducible<br>transcript 3                              | 7.79  | 9.71  | 1.78 | 5.29 | 6.01 |
|        |               |                                                                   |       |       |      | E-11 | E-10 |
| 22882  | ZHX2          | zinc fingers and<br>homeoboxes 2                                  | 7.47  | 9.45  | 1.78 | 1.01 | 3.33 |
|        |               |                                                                   |       |       |      | E-15 | E-14 |
| 10184  | LHFPL2        | lipoma HMGIC fusion<br>partner-like 2                             | 8.41  | 10.25 | 1.78 | 7.04 | 2.42 |
|        |               |                                                                   |       |       |      | E-16 | E-14 |
| 79605  | PGBD5         | piggyBac transposable<br>element derived 5                        | 6.73  | 8.93  | 1.78 | 7.13 | 3.91 |
|        |               |                                                                   |       |       |      | E-18 | E-16 |
| 1605   | DAG1          | dystroglycan 1<br>(dystrophin-associated<br>glycoprotein 1)       | 8.95  | 10.74 | 1.77 | 3.59 | 1.60 |
|        |               |                                                                   |       |       |      | E-17 | E-15 |
| 130827 | TMEM18<br>2   | transmembrane protein 182                                         | 6.45  | 8.76  | 1.77 | 6.03 | 2.58 |
|        |               |                                                                   |       |       |      | E-17 | E-15 |
| 57571  | CARNS1        | carnosine synthase 1                                              | 6.47  | 8.77  | 1.77 | 1.16 | 4.69 |
|        |               |                                                                   |       |       |      | E-16 | E-15 |
| 165904 | XIRP1         | xin actin-binding repeat<br>containing 1                          | 6.74  | 8.93  | 1.77 | 1.87 | 4.60 |
|        |               |                                                                   |       |       |      | E-14 | E-13 |
| 57158  | JPH2          | junctophilin 2                                                    | 7.39  | 9.38  | 1.77 | 2.80 | 1.31 |
|        |               |                                                                   |       |       |      | E-17 | E-15 |
| 8878   | SQSTM1        | sequestosome 1                                                    | 11.75 | 13.65 | 1.76 | 5.36 | 1.89 |
|        |               |                                                                   |       |       |      | E-16 | E-14 |
| 84706  | GPT2          | glutamic pyruvate<br>transaminase (alanine<br>aminotransferase) 2 | 8.65  | 10.45 | 1.76 | 7.50 | 1.01 |
|        |               |                                                                   |       |       |      | E-12 | E-10 |
| 140825 | NEURL2        | neuralized homolog 2<br>(Drosophila)                              | 6.93  | 9.02  | 1.75 | 1.14 | 3.70 |
|        |               |                                                                   |       |       |      | E-15 | E-14 |
| 7078   | TIMP3         | TIMP metallopeptidase<br>inhibitor 3                              | 8.47  | 10.27 | 1.74 | 2.75 | 2.70 |
|        |               |                                                                   |       |       |      | E-10 | E-09 |
| 4303   | FOXO4         | forkhead box O4                                                   | 7.48  | 9.41  | 1.74 | 1.76 | 5.42 |
|        |               |                                                                   |       |       |      | E-15 | E-14 |
| 56999  | ADAMTS<br>9   | ADAM metallopeptidase<br>with thrombospondin type<br>1 motif, 9   | 6.42  | 8.70  | 1.73 | 1.84 | 5.66 |
|        |               |                                                                   |       |       |      | E-15 | E-14 |
| 5287   | PIK3C2B       | phosphoinositide-3-kinase,<br>class 2, beta polypeptide           | 6.66  | 8.84  | 1.73 | 1.33 | 5.33 |



|        |          |                                                                                     |       |       |      |      |      |
|--------|----------|-------------------------------------------------------------------------------------|-------|-------|------|------|------|
| 5308   | PITX2    | paired-like homeodomain 2                                                           | 8.84  | 10.59 | 1.72 | E-16 | E-15 |
|        |          |                                                                                     |       |       |      | E-16 | E-14 |
| 23175  | LPIN1    | lipin 1                                                                             | 8.44  | 10.23 | 1.72 | 2.13 | 4.08 |
|        |          |                                                                                     |       |       |      | E-13 | E-12 |
| 5361   | PLXNA1   | plexin A1                                                                           | 8.08  | 9.90  | 1.72 | 9.53 | 3.17 |
|        |          |                                                                                     |       |       |      | E-16 | E-14 |
| 715    | C1R      | complement component 1, r subcomponent                                              | 6.60  | 8.79  | 1.72 | 1.08 | 1.75 |
|        |          |                                                                                     |       |       |      | E-12 | E-11 |
| 139818 | DOCK11   | dedicator of cytokinesis 11                                                         | 7.50  | 9.41  | 1.71 | 7.52 | 2.00 |
|        |          |                                                                                     |       |       |      | E-15 | E-13 |
| 22843  | PPM1E    | protein phosphatase, Mg <sup>2+</sup> /Mn <sup>2+</sup> dependent, 1E               | 6.84  | 8.93  | 1.71 | 7.80 | 2.65 |
|        |          |                                                                                     |       |       |      | E-16 | E-14 |
| 4779   | NFE2L1   | nuclear factor (erythroid-derived 2)-like 1                                         | 9.42  | 11.11 | 1.70 | 1.91 | 7.32 |
|        |          |                                                                                     |       |       |      | E-16 | E-15 |
| 5412   | UBL3     | ubiquitin-like 3                                                                    | 8.79  | 10.51 | 1.70 | 1.45 | 7.42 |
|        |          |                                                                                     |       |       |      | E-17 | E-16 |
| 6310   | ATXN1    | ataxin 1                                                                            | 7.64  | 9.49  | 1.70 | 1.32 | 3.38 |
|        |          |                                                                                     |       |       |      | E-14 | E-13 |
| 4854   | NOTCH3   | notch 3                                                                             | 7.35  | 9.26  | 1.69 | 1.58 | 6.12 |
|        |          |                                                                                     |       |       |      | E-16 | E-15 |
| 7136   | TNNI2    | troponin I type 2 (skeletal, fast)                                                  | 6.65  | 8.79  | 1.69 | 4.94 | 1.76 |
|        |          |                                                                                     |       |       |      | E-16 | E-14 |
| 12     | SERPINA3 | serpin peptidase inhibitor, clade A (alpha-1 antiproteinase, antitrypsin), member 3 | 6.67  | 8.80  | 1.69 | 1.04 | 3.41 |
|        |          |                                                                                     |       |       |      | E-15 | E-14 |
| 22846  | VASH1    | vasohibin 1                                                                         | 6.91  | 8.94  | 1.68 | 3.43 | 1.54 |
|        |          |                                                                                     |       |       |      | E-17 | E-15 |
| 10124  | ARL4A    | ADP-ribosylation factor-like 4A                                                     | 8.80  | 10.51 | 1.68 | 3.39 | 7.99 |
|        |          |                                                                                     |       |       |      | E-14 | E-13 |
| 5414   | 4-Sep    | septin 4                                                                            | 6.74  | 8.84  | 1.68 | 7.08 | 2.97 |
|        |          |                                                                                     |       |       |      | E-17 | E-15 |
| 56937  | PMEPA1   | prostate transmembrane protein, androgen induced 1                                  | 9.12  | 10.82 | 1.68 | 2.43 | 9.12 |
|        |          |                                                                                     |       |       |      | E-16 | E-15 |
| 29968  | PSAT1    | phosphoserine aminotransferase 1                                                    | 9.52  | 11.18 | 1.68 | 7.49 | 6.82 |
|        |          |                                                                                     |       |       |      | E-10 | E-09 |
| 400818 | NBPF9    | neuroblastoma breakpoint family, member 9                                           | 11.14 | 12.88 | 1.68 | 7.22 | 5.45 |
|        |          |                                                                                     |       |       |      | E-09 | E-08 |
| 7351   | UCP2     | uncoupling protein 2 (mitochondrial, proton carrier)                                | 8.17  | 9.95  | 1.68 | 3.51 | 1.28 |
|        |          |                                                                                     |       |       |      | E-16 | E-14 |
| 547    | KIF1A    | kinesin family member 1A                                                            | 6.48  | 8.68  | 1.68 | 8.47 | 1.82 |
|        |          |                                                                                     |       |       |      | E-14 | E-12 |
| 7164   | TPD52L1  | tumor protein D52-like 1                                                            | 6.72  | 8.80  | 1.67 | 3.12 | 1.43 |
|        |          |                                                                                     |       |       |      | E-17 | E-15 |

|               |          |                                                                                                        |       |       |      |              |              |
|---------------|----------|--------------------------------------------------------------------------------------------------------|-------|-------|------|--------------|--------------|
| 8408          | ULK1     | unc-51-like kinase 1 ( <i>C. elegans</i> )                                                             | 9.42  | 11.06 | 1.67 | 4.17<br>E-15 | 1.18<br>E-13 |
| 3418          | IDH2     | isocitrate dehydrogenase 2 (NADP+), mitochondrial                                                      | 9.61  | 11.26 | 1.66 | 3.11<br>E-14 | 7.36<br>E-13 |
| 10231         | RCAN2    | regulator of calcineurin 2                                                                             | 7.49  | 9.35  | 1.66 | 1.11<br>E-14 | 2.89<br>E-13 |
| 836           | CASP3    | caspase 3, apoptosis-related cysteine peptidase                                                        | 10.07 | 11.73 | 1.65 | 8.20<br>E-16 | 2.77<br>E-14 |
| 5997          | RGS2     | regulator of G-protein signaling 2, 24kDa                                                              | 8.99  | 10.67 | 1.65 | 6.49<br>E-16 | 2.24<br>E-14 |
| 4060          | LUM      | lumican                                                                                                | 8.21  | 9.96  | 1.65 | 5.08<br>E-13 | 8.87<br>E-12 |
| 167227        | DCP2     | DCP2 decapping enzyme homolog ( <i>S. cerevisiae</i> )                                                 | 8.16  | 9.91  | 1.65 | 6.55<br>E-15 | 1.76<br>E-13 |
| 83445         | GSG1     | germ cell associated 1                                                                                 | 6.57  | 8.70  | 1.65 | 2.21<br>E-16 | 8.41<br>E-15 |
| 10456         | HAX1     | HCLS1 associated protein X-1                                                                           | 9.01  | 10.68 | 1.65 | 1.40<br>E-12 | 2.22<br>E-11 |
| 219771        | CCNY     | cyclin Y                                                                                               | 8.82  | 10.49 | 1.64 | 5.56<br>E-17 | 2.39<br>E-15 |
| 9770          | RASSF2   | Ras association (RalGDS/AF-6) domain family member 2                                                   | 6.69  | 8.76  | 1.64 | 2.00<br>E-15 | 6.08<br>E-14 |
| 8648          | NCOA1    | nuclear receptor coactivator 1                                                                         | 8.05  | 9.79  | 1.64 | 1.41<br>E-16 | 5.58<br>E-15 |
| 5176          | SERPINF1 | serpin peptidase inhibitor, clade F (alpha-2 antiplasmin, pigment epithelium derived factor), member 1 | 8.73  | 10.40 | 1.63 | 1.11<br>E-13 | 2.29<br>E-12 |
| 861           | RUNX1    | runt-related transcription factor 1                                                                    | 8.85  | 10.51 | 1.63 | 1.93<br>E-15 | 5.91<br>E-14 |
| 100132<br>406 | NBPF10   | neuroblastoma breakpoint family, member 10                                                             | 11.21 | 12.89 | 1.63 | 2.80<br>E-08 | 1.90<br>E-07 |
| 868           | CBLB     | Cas-Br-M (murine) ecotropic retroviral transforming sequence b                                         | 8.34  | 10.05 | 1.63 | 5.74<br>E-14 | 1.28<br>E-12 |
| 6450          | SH3BGR   | SH3 domain binding glutamic acid-rich protein                                                          | 6.92  | 8.88  | 1.63 | 1.15<br>E-12 | 1.85<br>E-11 |
| 81544         | GDPD5    | glycerophosphodiester phosphodiesterase domain containing 5                                            | 7.16  | 9.04  | 1.63 | 4.94<br>E-16 | 1.76<br>E-14 |
| 2308          | FOXO1    | forkhead box O1                                                                                        | 7.82  | 9.58  | 1.62 | 4.83<br>E-16 | 1.73<br>E-14 |
| 490           | ATP2B1   | ATPase, Ca <sup>++</sup> transporting, plasma membrane 1                                               | 6.76  | 8.78  | 1.62 | 3.96<br>E-15 | 1.13<br>E-13 |
| 6444          | SGCD     | sarcoglycan, delta (35kDa dystrophin-associated glycoprotein)                                          | 8.21  | 9.92  | 1.61 | 1.17<br>E-15 | 3.75<br>E-14 |

|               |              |                                                                                                       |       |       |      |              |              |
|---------------|--------------|-------------------------------------------------------------------------------------------------------|-------|-------|------|--------------|--------------|
| 100008<br>589 | RN28S1       | RNA, 28S ribosomal 1                                                                                  | 11.45 | 13.14 | 1.61 | 1.23<br>E-13 | 2.50<br>E-12 |
| 9686          | VGLL4        | vestigial like 4<br>(Drosophila)                                                                      | 8.84  | 10.48 | 1.61 | 5.13<br>E-15 | 1.43<br>E-13 |
| 1160          | CKMT2        | creatine kinase,<br>mitochondrial 2<br>(sarcomeric)                                                   | 6.48  | 8.61  | 1.61 | 5.85<br>E-16 | 2.04<br>E-14 |
| 51400         | PPME1        | protein phosphatase<br>methyltransferase 1                                                            | 10.30 | 11.91 | 1.61 | 6.80<br>E-15 | 1.83<br>E-13 |
| 23066         | CAND2        | cullin-associated and<br>neddylation-dissociated 2<br>(putative)                                      | 7.35  | 9.17  | 1.60 | 1.17<br>E-15 | 3.75<br>E-14 |
| 779           | CACNA1<br>S  | calcium channel, voltage-<br>dependent, L type, alpha<br>1S subunit                                   | 7.06  | 8.94  | 1.60 | 3.83<br>E-14 | 8.92<br>E-13 |
| 56995         | TULP4        | tubby like protein 4                                                                                  | 8.38  | 10.05 | 1.60 | 5.53<br>E-11 | 6.25<br>E-10 |
| 1545          | CYP1B1       | cytochrome P450, family<br>1, subfamily B,<br>polypeptide 1                                           | 6.46  | 8.58  | 1.59 | 8.63<br>E-12 | 1.14<br>E-10 |
| 83643         | CCDC3        | coiled-coil domain<br>containing 3                                                                    | 7.61  | 9.37  | 1.59 | 2.21<br>E-15 | 6.66<br>E-14 |
| 1301          | COL11A1      | collagen, type XI, alpha 1                                                                            | 8.93  | 10.55 | 1.59 | 5.76<br>E-16 | 2.01<br>E-14 |
| 51339         | DACT1        | dapper, antagonist of beta-<br>catenin, homolog 1<br>(Xenopus laevis)                                 | 7.45  | 9.23  | 1.59 | 7.13<br>E-16 | 2.44<br>E-14 |
| 255743        | NPNT         | nephronectin                                                                                          | 6.60  | 8.65  | 1.57 | 1.05<br>E-14 | 2.75<br>E-13 |
| 23612         | PHLDA3       | pleckstrin homology-like<br>domain, family A, member<br>3                                             | 8.81  | 10.41 | 1.57 | 1.93<br>E-15 | 5.91<br>E-14 |
| 54843         | SYTL2        | synaptotagmin-like 2                                                                                  | 9.47  | 11.02 | 1.57 | 1.58<br>E-15 | 4.90<br>E-14 |
| 124152        | IQCK         | IQ motif containing K                                                                                 | 8.38  | 10.02 | 1.57 | 5.66<br>E-16 | 1.97<br>E-14 |
| 54715         | RBFOX1       | RNA binding protein, fox-<br>1 homolog (C. elegans) 1                                                 | 6.59  | 8.63  | 1.57 | 2.45<br>E-16 | 9.19<br>E-15 |
| 203           | AK1          | adenylate kinase 1                                                                                    | 8.28  | 9.92  | 1.57 | 5.76<br>E-15 | 1.58<br>E-13 |
| 221937        | FOXK1        | forkhead box K1                                                                                       | 8.16  | 9.81  | 1.56 | 3.88<br>E-13 | 6.97<br>E-12 |
| 57664         | PLEKHA<br>4  | pleckstrin homology<br>domain containing, family<br>A (phosphoinositide<br>binding specific) member 4 | 7.69  | 9.41  | 1.56 | 5.90<br>E-16 | 2.05<br>E-14 |
| 5269          | SERPINB<br>6 | serpin peptidase inhibitor,<br>clade B (ovalbumin),<br>member 6                                       | 11.51 | 13.16 | 1.56 | 1.31<br>E-16 | 5.25<br>E-15 |
| 6520          | SLC3A2       | solute carrier family 3<br>(activators of dibasic and                                                 | 8.34  | 9.98  | 1.56 | 2.09         | 2.54         |

|        |           |                                                                     |       |       |      |              |              |
|--------|-----------|---------------------------------------------------------------------|-------|-------|------|--------------|--------------|
|        |           | neutral amino acid transport), member 2                             |       |       |      | E-11         | E-10         |
| 56940  | DUSP22    | dual specificity phosphatase 22                                     | 8.30  | 9.94  | 1.56 | 1.81<br>E-14 | 4.48<br>E-13 |
| 255488 | RNF144B   | ring finger protein 144B                                            | 6.44  | 8.52  | 1.56 | 2.59<br>E-15 | 7.66<br>E-14 |
| 25878  | MXRA5     | matrix-remodelling associated 5                                     | 8.39  | 10.01 | 1.56 | 8.84<br>E-12 | 1.17<br>E-10 |
| 29995  | LMCD1     | LIM and cysteine-rich domains 1                                     | 8.49  | 10.10 | 1.55 | 1.49<br>E-15 | 4.67<br>E-14 |
| 728734 | LOC728734 | nuclear pore complex-interacting protein-like 3-like                | 9.10  | 10.67 | 1.55 | 3.48<br>E-13 | 6.32<br>E-12 |
| 6286   | S100P     | S100 calcium binding protein P                                      | 6.26  | 8.39  | 1.55 | 5.62<br>E-09 | 4.32<br>E-08 |
| 81603  | TRIM8     | tripartite motif containing 8                                       | 10.66 | 12.24 | 1.55 | 1.01<br>E-15 | 3.33<br>E-14 |
| 9644   | SH3PXD2A  | SH3 and PX domains 2A                                               | 9.80  | 11.33 | 1.54 | 2.15<br>E-12 | 3.28<br>E-11 |
| 3799   | KIF5B     | kinesin family member 5B                                            | 8.93  | 10.49 | 1.54 | 1.27<br>E-13 | 2.58<br>E-12 |
| 64112  | MOAP1     | modulator of apoptosis 1                                            | 7.94  | 9.58  | 1.54 | 2.53<br>E-15 | 7.51<br>E-14 |
| 9220   | TIAF1     | TGFB1-induced anti-apoptotic factor 1                               | 8.57  | 10.14 | 1.53 | 7.62<br>E-14 | 1.66<br>E-12 |
| 26512  | INTS6     | integrator complex subunit 6                                        | 6.84  | 8.73  | 1.52 | 2.79<br>E-13 | 5.18<br>E-12 |
| 8019   | BRD3      | bromodomain containing 3                                            | 8.94  | 10.49 | 1.52 | 5.02<br>E-13 | 8.77<br>E-12 |
| 340348 | TSPAN33   | tetraspanin 33                                                      | 6.53  | 8.54  | 1.52 | 2.28<br>E-15 | 6.82<br>E-14 |
| 55640  | FLVCR2    | feline leukemia virus subgroup C cellular receptor family, member 2 | 7.90  | 9.54  | 1.52 | 1.54<br>E-16 | 6.02<br>E-15 |
| 5664   | PSEN2     | presenilin 2 (Alzheimer disease 4)                                  | 7.67  | 9.35  | 1.52 | 6.29<br>E-15 | 1.70<br>E-13 |
| 6307   | SC4MOL    | sterol-C4-methyl oxidase-like                                       | 9.27  | 10.80 | 1.52 | 1.25<br>E-10 | 1.31<br>E-09 |
| 3006   | HIST1H1C  | histone cluster 1, H1c                                              | 8.13  | 9.75  | 1.52 | 1.44<br>E-13 | 2.89<br>E-12 |
| 8445   | DYRK2     | dual-specificity tyrosine-(Y)-phosphorylation regulated kinase 2    | 7.61  | 9.29  | 1.52 | 1.71<br>E-14 | 4.26<br>E-13 |
| 285193 | DUSP28    | dual specificity phosphatase 28                                     | 7.97  | 9.59  | 1.51 | 3.35<br>E-15 | 9.65<br>E-14 |
| 6920   | TCEA3     | transcription elongation factor A (SII), 3                          | 9.41  | 10.92 | 1.51 | 5.16<br>E-13 | 9.00<br>E-12 |
| 716    | C1S       | complement component 1,                                             | 6.85  | 8.71  | 1.51 | 2.95         | 7.02         |

|        |          |                                                                                 |       |       |      |              |              |
|--------|----------|---------------------------------------------------------------------------------|-------|-------|------|--------------|--------------|
|        |          | s subcomponent                                                                  |       |       |      | E-14         | E-13         |
| 5660   | PSAP     | prosaposin                                                                      | 11.57 | 13.18 | 1.51 | 3.02<br>E-16 | 1.11<br>E-14 |
| 3638   | INSIG1   | insulin induced gene 1                                                          | 9.66  | 11.15 | 1.51 | 8.26<br>E-11 | 9.03<br>E-10 |
| 6709   | SPTAN1   | spectrin, alpha, non-erythrocytic 1 (alpha-fodrin)                              | 8.89  | 10.41 | 1.51 | 1.05<br>E-11 | 1.36<br>E-10 |
| 6638   | SNRPN    | small nuclear ribonucleoprotein polypeptide N                                   | 9.78  | 11.27 | 1.51 | 5.66<br>E-15 | 1.55<br>E-13 |
| 26010  | SPATS2L  | spermatogenesis associated, serine-rich 2-like                                  | 11.01 | 12.54 | 1.50 | 1.04<br>E-14 | 2.71<br>E-13 |
| 256281 | NUDT14   | nudix (nucleoside diphosphate linked moiety X)-type motif 14                    | 8.53  | 10.08 | 1.50 | 6.15<br>E-12 | 8.41<br>E-11 |
| 7325   | UBE2E2   | ubiquitin-conjugating enzyme E2E 2 (UBC4/5 homolog, yeast)                      | 9.62  | 11.10 | 1.50 | 1.19<br>E-14 | 3.07<br>E-13 |
| 7273   | TTN      | titin                                                                           | 6.32  | 8.36  | 1.50 | 3.94<br>E-13 | 7.06<br>E-12 |
| 8926   | SNURF    | SNRPN upstream reading frame                                                    | 9.93  | 11.40 | 1.49 | 3.24<br>E-15 | 9.39<br>E-14 |
| 10500  | SEMA6C   | sema domain, transmembrane domain (TM), and cytoplasmic domain, (semaphorin) 6C | 6.50  | 8.49  | 1.49 | 1.52<br>E-14 | 3.84<br>E-13 |
| 54536  | EXOC6    | exocyst complex component 6                                                     | 7.52  | 9.19  | 1.49 | 2.74<br>E-15 | 8.06<br>E-14 |
| 6196   | RPS6KA2  | ribosomal protein S6 kinase, 90kDa, polypeptide 2                               | 9.02  | 10.53 | 1.49 | 1.61<br>E-13 | 3.19<br>E-12 |
| 53632  | PRKAG3   | protein kinase, AMP-activated, gamma 3 non-catalytic subunit                    | 6.46  | 8.46  | 1.49 | 4.96<br>E-16 | 1.76<br>E-14 |
| 166336 | PRICKLE2 | prickle homolog 2 (Drosophila)                                                  | 8.51  | 10.05 | 1.48 | 2.70<br>E-14 | 6.47<br>E-13 |
| 7158   | TP53BP1  | tumor protein p53 binding protein 1                                             | 8.33  | 9.89  | 1.48 | 9.62<br>E-14 | 2.03<br>E-12 |
| 9361   | LONP1    | lon peptidase 1, mitochondrial                                                  | 8.93  | 10.43 | 1.47 | 2.14<br>E-13 | 4.08<br>E-12 |
| 11149  | BVES     | blood vessel epicardial substance                                               | 6.39  | 8.39  | 1.47 | 1.40<br>E-14 | 3.55<br>E-13 |
| 3655   | ITGA6    | integrin, alpha 6                                                               | 7.26  | 8.96  | 1.47 | 1.82<br>E-14 | 4.51<br>E-13 |
| 84940  | CORO6    | coronin 6                                                                       | 7.69  | 9.31  | 1.47 | 9.11<br>E-13 | 1.52<br>E-11 |
| 10079  | ATP9A    | ATPase, class II, type 9A                                                       | 8.45  | 9.98  | 1.46 | 8.52<br>E-14 | 1.82<br>E-12 |

|        |           |                                                                             |       |       |      |              |              |
|--------|-----------|-----------------------------------------------------------------------------|-------|-------|------|--------------|--------------|
| 10493  | VAT1      | vesicle amine transport protein 1 homolog (T. californica)                  | 9.37  | 10.83 | 1.46 | 2.58<br>E-13 | 4.82<br>E-12 |
| 28992  | MACRO D1  | MACRO domain containing 1                                                   | 7.78  | 9.37  | 1.45 | 6.98<br>E-15 | 1.87<br>E-13 |
| 55228  | PNMAL1    | PNMA-like 1                                                                 | 8.32  | 9.84  | 1.45 | 1.37<br>E-14 | 3.49<br>E-13 |
| 352954 | GATS      | GATS, stromal antigen 3 opposite strand                                     | 6.76  | 8.60  | 1.45 | 2.00<br>E-15 | 6.09<br>E-14 |
| 152926 | PPM1K     | protein phosphatase, Mg <sup>2+</sup> /Mn <sup>2+</sup> dependent, 1K       | 6.84  | 8.65  | 1.45 | 1.64<br>E-15 | 5.07<br>E-14 |
| 3908   | LAMA2     | laminin, alpha 2                                                            | 7.47  | 9.10  | 1.44 | 5.61<br>E-14 | 1.25<br>E-12 |
| 81606  | LBH       | limb bud and heart development homolog (mouse)                              | 9.16  | 10.61 | 1.44 | 1.14<br>E-15 | 3.69<br>E-14 |
| 8076   | MFAP5     | microfibrillar associated protein 5                                         | 9.70  | 11.13 | 1.44 | 1.02<br>E-14 | 2.67<br>E-13 |
| 23462  | HEY1      | hairy/enhancer-of-split related with YRPW motif 1                           | 6.90  | 8.68  | 1.44 | 1.65<br>E-14 | 4.13<br>E-13 |
| 60370  | AVPI1     | arginine vasopressin-induced 1                                              | 9.50  | 10.94 | 1.44 | 9.25<br>E-14 | 1.97<br>E-12 |
| 144165 | PRICKLE 1 | prickle homolog 1 (Drosophila)                                              | 7.79  | 9.37  | 1.44 | 3.83<br>E-15 | 1.09<br>E-13 |
| 84676  | TRIM63    | tripartite motif containing 63                                              | 6.66  | 8.53  | 1.44 | 1.14<br>E-13 | 2.33<br>E-12 |
| 8851   | CDK5R1    | cyclin-dependent kinase 5, regulatory subunit 1 (p35)                       | 8.21  | 9.72  | 1.43 | 1.44<br>E-12 | 2.28<br>E-11 |
| 23558  | WBP2      | WW domain binding protein 2                                                 | 10.65 | 12.11 | 1.43 | 4.15<br>E-14 | 9.54<br>E-13 |
| 8605   | PLA2G4C   | phospholipase A2, group IVC (cytosolic, calcium-independent)                | 6.76  | 8.58  | 1.43 | 6.99<br>E-14 | 1.53<br>E-12 |
| 54813  | KLHL28    | kelch-like 28 (Drosophila)                                                  | 7.25  | 8.89  | 1.43 | 1.38<br>E-15 | 4.37<br>E-14 |
| 25903  | OLFML2 B  | olfactomedin-like 2B                                                        | 6.75  | 8.57  | 1.42 | 2.58<br>E-13 | 4.81<br>E-12 |
| 79156  | PLEKHF1   | pleckstrin homology domain containing, family F (with FYVE domain) member 1 | 7.60  | 9.17  | 1.41 | 3.76<br>E-12 | 5.38<br>E-11 |
| 5920   | RARRES 3  | retinoic acid receptor responder (tazarotene induced) 3                     | 6.63  | 8.48  | 1.41 | 7.12<br>E-11 | 7.88<br>E-10 |
| 23452  | ANGPTL 2  | angiopoietin-like 2                                                         | 8.29  | 9.77  | 1.41 | 4.93<br>E-12 | 6.88<br>E-11 |
| 5348   | FXVD1     | FXVD domain containing ion transport regulator 1                            | 6.66  | 8.50  | 1.41 | 1.31<br>E-12 | 2.10<br>E-11 |

|        |           |                                                                      |       |       |      |              |              |
|--------|-----------|----------------------------------------------------------------------|-------|-------|------|--------------|--------------|
| 81619  | TSPAN14   | tetraspanin 14                                                       | 7.23  | 8.86  | 1.41 | 1.05<br>E-13 | 2.18<br>E-12 |
| 54749  | EPDR1     | ependymin related protein 1 (zebrafish)                              | 10.34 | 11.76 | 1.41 | 5.97<br>E-15 | 1.63<br>E-13 |
| 79090  | TRAPPC6A  | trafficking protein particle complex 6A                              | 7.59  | 9.15  | 1.41 | 3.92<br>E-13 | 7.03<br>E-12 |
| 6016   | RIT1      | Ras-like without CAAX 1                                              | 8.59  | 10.04 | 1.41 | 2.58<br>E-14 | 6.19<br>E-13 |
| 801    | CALM1     | calmodulin 1 (phosphorylase kinase, delta)                           | 11.28 | 12.75 | 1.41 | 7.94<br>E-15 | 2.11<br>E-13 |
| 59     | ACTA2     | actin, alpha 2, smooth muscle, aorta                                 | 11.99 | 13.48 | 1.40 | 3.38<br>E-15 | 9.72<br>E-14 |
| 144363 | LYRM5     | LYR motif containing 5                                               | 9.03  | 10.45 | 1.40 | 5.80<br>E-13 | 1.00<br>E-11 |
| 57214  | KIAA1199  | KIAA1199                                                             | 9.00  | 10.43 | 1.40 | 1.15<br>E-11 | 1.48<br>E-10 |
| 9181   | ARHGEF2   | Rho/Rac guanine nucleotide exchange factor (GEF) 2                   | 11.56 | 13.04 | 1.40 | 5.19<br>E-15 | 1.44<br>E-13 |
| 84561  | SLC12A8   | solute carrier family 12 (potassium/chloride transporters), member 8 | 6.88  | 8.62  | 1.40 | 3.24<br>E-13 | 5.92<br>E-12 |
| 9846   | GAB2      | GRB2-associated binding protein 2                                    | 7.84  | 9.37  | 1.40 | 2.03<br>E-14 | 4.97<br>E-13 |
| 6272   | SORT1     | sortilin 1                                                           | 9.69  | 11.07 | 1.40 | 4.57<br>E-14 | 1.04<br>E-12 |
| 81493  | SYNC      | syncoilin, intermediate filament protein                             | 8.33  | 9.79  | 1.39 | 4.75<br>E-13 | 8.35<br>E-12 |
| 9873   | FCHSD2    | FCH and double SH3 domains 2                                         | 7.68  | 9.21  | 1.39 | 1.42<br>E-13 | 2.86<br>E-12 |
| 8334   | HIST1H2AC | histone cluster 1, H2ac                                              | 6.67  | 8.49  | 1.39 | 1.40<br>E-13 | 2.83<br>E-12 |
| 51313  | FAM198B   | family with sequence similarity 198, member B                        | 7.48  | 9.05  | 1.39 | 8.38<br>E-13 | 1.40<br>E-11 |
| 51155  | HN1       | hematological and neurological expressed 1                           | 9.96  | 11.34 | 1.39 | 7.90<br>E-13 | 1.33<br>E-11 |
| 26508  | HEYL      | hairy/enhancer-of-split related with YRPW motif-like                 | 9.31  | 10.70 | 1.39 | 1.63<br>E-11 | 2.04<br>E-10 |
| 4199   | ME1       | malic enzyme 1, NADP(+)-dependent, cytosolic                         | 8.11  | 9.59  | 1.39 | 5.03<br>E-14 | 1.14<br>E-12 |
| 10468  | FST       | follicle-stimulating hormone receptor 1                              | 9.35  | 10.73 | 1.39 | 2.54<br>E-15 | 7.53<br>E-14 |
| 3949   | LDLR      | low density lipoprotein receptor                                     | 10.58 | 12.00 | 1.39 | 7.73<br>E-11 | 8.49<br>E-10 |
| 55294  | FBXW7     | F-box and WD repeat domain containing 7                              | 7.38  | 8.96  | 1.39 | 2.11<br>E-14 | 5.14<br>E-13 |

|        |          |                                                                                              |       |       |      |      |      |
|--------|----------|----------------------------------------------------------------------------------------------|-------|-------|------|------|------|
| 3727   | JUND     | jun D proto-oncogene                                                                         | 10.96 | 12.39 | 1.39 | 4.84 | 1.35 |
|        |          |                                                                                              |       |       |      | E-15 | E-13 |
| 56704  | JPH1     | junctophilin 1                                                                               | 6.21  | 8.15  | 1.38 | 9.85 | 2.58 |
|        |          |                                                                                              |       |       |      | E-15 | E-13 |
| 30011  | SH3KBP1  | SH3-domain kinase binding protein 1                                                          | 6.74  | 8.51  | 1.38 | 3.51 | 8.26 |
|        |          |                                                                                              |       |       |      | E-14 | E-13 |
| 2181   | ACSL3    | acyl-CoA synthetase long-chain family member 3                                               | 9.67  | 11.03 | 1.37 | 8.18 | 1.37 |
|        |          |                                                                                              |       |       |      | E-13 | E-11 |
| 56907  | SPIRE1   | spire homolog 1 (Drosophila)                                                                 | 9.59  | 10.96 | 1.37 | 1.84 | 4.54 |
|        |          |                                                                                              |       |       |      | E-14 | E-13 |
| 151126 | ZNF385B  | zinc finger protein 385B                                                                     | 6.55  | 8.40  | 1.37 | 1.83 | 3.58 |
|        |          |                                                                                              |       |       |      | E-13 | E-12 |
| 29948  | OSGIN1   | oxidative stress induced growth inhibitor 1                                                  | 8.68  | 10.10 | 1.37 | 8.89 | 7.97 |
|        |          |                                                                                              |       |       |      | E-10 | E-09 |
| 79443  | FYCO1    | FYVE and coiled-coil domain containing 1                                                     | 8.05  | 9.52  | 1.37 | 1.72 | 3.38 |
|        |          |                                                                                              |       |       |      | E-13 | E-12 |
| 8209   | C21orf33 | chromosome 21 open reading frame 33                                                          | 10.20 | 11.56 | 1.37 | 1.17 | 3.04 |
|        |          |                                                                                              |       |       |      | E-14 | E-13 |
| 22906  | TRAK1    | trafficking protein, kinesin binding 1                                                       | 8.22  | 9.66  | 1.37 | 9.52 | 2.01 |
|        |          |                                                                                              |       |       |      | E-14 | E-12 |
| 400916 | CHCHD10  | coiled-coil-helix-coiled-coil-helix domain containing 10                                     | 9.64  | 10.99 | 1.36 | 1.13 | 2.93 |
|        |          |                                                                                              |       |       |      | E-14 | E-13 |
| 54897  | CASZ1    | castor zinc finger 1                                                                         | 6.46  | 8.32  | 1.36 | 1.31 | 4.17 |
|        |          |                                                                                              |       |       |      | E-15 | E-14 |
| 1859   | DYRK1A   | dual-specificity tyrosine-(Y)-phosphorylation regulated kinase 1A                            | 8.46  | 9.88  | 1.36 | 1.01 | 1.66 |
|        |          |                                                                                              |       |       |      | E-12 | E-11 |
| 10147  | SUGP2    | SURP and G patch domain containing 2                                                         | 8.76  | 10.15 | 1.36 | 2.39 | 7.13 |
|        |          |                                                                                              |       |       |      | E-15 | E-14 |
| 6868   | ADAM17   | ADAM metallopeptidase domain 17                                                              | 8.38  | 9.80  | 1.36 | 2.58 | 3.83 |
|        |          |                                                                                              |       |       |      | E-12 | E-11 |
| 388403 | YPEL2    | yippee-like 2 (Drosophila)                                                                   | 6.71  | 8.47  | 1.35 | 8.20 | 1.77 |
|        |          |                                                                                              |       |       |      | E-14 | E-12 |
| 734    | OSGIN2   | oxidative stress induced growth inhibitor family member 2                                    | 7.65  | 9.14  | 1.35 | 2.52 | 4.72 |
|        |          |                                                                                              |       |       |      | E-13 | E-12 |
| 2887   | GRB10    | growth factor receptor-bound protein 10                                                      | 7.95  | 9.41  | 1.35 | 4.01 | 7.18 |
|        |          |                                                                                              |       |       |      | E-13 | E-12 |
| 59338  | PLEKHA1  | pleckstrin homology domain containing, family A (phosphoinositide binding specific) member 1 | 7.96  | 9.42  | 1.35 | 1.69 | 4.22 |
|        |          |                                                                                              |       |       |      | E-14 | E-13 |
| 2009   | EML1     | echinoderm microtubule associated protein like 1                                             | 8.32  | 9.74  | 1.35 | 1.69 | 4.22 |
|        |          |                                                                                              |       |       |      | E-14 | E-13 |
| 4155   | MBP      | myelin basic protein                                                                         | 6.30  | 8.18  | 1.35 | 6.11 | 6.85 |
|        |          |                                                                                              |       |       |      | E-11 | E-10 |
| 3005   | H1F0     | H1 histone family, member 0                                                                  | 9.57  | 10.90 | 1.35 | 3.02 | 8.83 |



|        |                |                                                                                                                                                               |       |       |      |              |              |
|--------|----------------|---------------------------------------------------------------------------------------------------------------------------------------------------------------|-------|-------|------|--------------|--------------|
|        |                |                                                                                                                                                               |       |       |      | E-15         | E-14         |
| 150864 | FAM117<br>B    | family with sequence<br>similarity 117, member B                                                                                                              | 7.32  | 8.87  | 1.34 | 7.14<br>E-15 | 1.91<br>E-13 |
| 22796  | COG2           | component of oligomeric<br>golgi complex 2                                                                                                                    | 8.29  | 9.69  | 1.34 | 1.08<br>E-14 | 2.82<br>E-13 |
| 8531   | CSDA           | cold shock domain protein<br>A                                                                                                                                | 12.44 | 13.91 | 1.34 | 4.83<br>E-13 | 8.45<br>E-12 |
| 6510   | SLC1A5         | solute carrier family 1<br>(neutral amino acid<br>transporter), member 5                                                                                      | 8.63  | 10.02 | 1.34 | 1.07<br>E-08 | 7.83<br>E-08 |
| 64333  | ARHGAP<br>9    | Rho GTPase activating<br>protein 9                                                                                                                            | 6.72  | 8.46  | 1.34 | 1.38<br>E-12 | 2.20<br>E-11 |
| 224    | ALDH3A<br>2    | aldehyde dehydrogenase 3<br>family, member A2                                                                                                                 | 8.70  | 10.09 | 1.34 | 1.44<br>E-13 | 2.88<br>E-12 |
| 79720  | VPS37B         | vacuolar protein sorting 37<br>homolog B ( <i>S. cerevisiae</i> )                                                                                             | 9.07  | 10.42 | 1.34 | 5.59<br>E-14 | 1.25<br>E-12 |
| 8644   | AKR1C3         | aldo-keto reductase family<br>1, member C3 (3-alpha<br>hydroxysteroid<br>dehydrogenase, type II)                                                              | 10.20 | 11.51 | 1.34 | 2.77<br>E-13 | 5.15<br>E-12 |
| 2222   | FDFT1          | farnesyl-diphosphate<br>farnesyltransferase 1                                                                                                                 | 8.97  | 10.34 | 1.34 | 1.09<br>E-11 | 1.41<br>E-10 |
| 1109   | AKR1C4         | aldo-keto reductase family<br>1, member C4<br>(chlordecone reductase; 3-<br>alpha hydroxysteroid<br>dehydrogenase, type I;<br>dihydrodiol dehydrogenase<br>4) | 8.75  | 10.13 | 1.33 | 6.16<br>E-14 | 1.37<br>E-12 |
| 9066   | SYT7           | synaptotagmin VII                                                                                                                                             | 6.80  | 8.49  | 1.33 | 4.51<br>E-08 | 2.95<br>E-07 |
| 7328   | UBE2H          | ubiquitin-conjugating<br>enzyme E2H (UBC8<br>homolog, yeast)                                                                                                  | 8.50  | 9.88  | 1.33 | 3.19<br>E-13 | 5.85<br>E-12 |
| 1573   | CYP2J2         | cytochrome P450, family<br>2, subfamily J, polypeptide<br>2                                                                                                   | 6.54  | 8.34  | 1.33 | 7.51<br>E-15 | 2.00<br>E-13 |
| 23099  | ZBTB43         | zinc finger and BTB<br>domain containing 43                                                                                                                   | 7.87  | 9.31  | 1.32 | 4.64<br>E-13 | 8.17<br>E-12 |
| 8777   | MPDZ           | multiple PDZ domain<br>protein                                                                                                                                | 8.10  | 9.51  | 1.32 | 4.56<br>E-13 | 8.06<br>E-12 |
| 114915 | NCRNA0<br>0219 | non-protein coding RNA<br>219                                                                                                                                 | 9.36  | 10.68 | 1.31 | 3.87<br>E-13 | 6.97<br>E-12 |
| 10659  | CELF2          | CUGBP, Elav-like family<br>member 2                                                                                                                           | 7.57  | 9.04  | 1.31 | 2.15<br>E-12 | 3.28<br>E-11 |
| 8087   | FXR1           | fragile X mental<br>retardation, autosomal<br>homolog 1                                                                                                       | 10.92 | 12.27 | 1.31 | 2.82<br>E-12 | 4.15<br>E-11 |
| 10311  | DSCR3          | Down syndrome critical<br>region gene 3                                                                                                                       | 8.89  | 10.24 | 1.31 | 2.05<br>E-13 | 3.94<br>E-12 |

|        |            |                                                                       |       |       |      |              |              |
|--------|------------|-----------------------------------------------------------------------|-------|-------|------|--------------|--------------|
| 98     | ACYP2      | acylphosphatase 2, muscle type                                        | 8.45  | 9.81  | 1.31 | 2.25<br>E-13 | 4.28<br>E-12 |
| 9236   | CCPG1      | cell cycle progression 1                                              | 8.28  | 9.65  | 1.30 | 3.50<br>E-12 | 5.05<br>E-11 |
| 51465  | UBE2J1     | ubiquitin-conjugating enzyme E2, J1 (UBC6 homolog, yeast)             | 8.98  | 10.32 | 1.30 | 1.51<br>E-13 | 3.01<br>E-12 |
| 9209   | LRRFIP2    | leucine rich repeat (in FLII) interacting protein 2                   | 6.24  | 8.09  | 1.30 | 1.01<br>E-12 | 1.66<br>E-11 |
| 287    | ANK2       | ankyrin 2, neuronal                                                   | 6.75  | 8.43  | 1.30 | 4.42<br>E-14 | 1.01<br>E-12 |
| 4908   | NTF3       | neurotrophin 3                                                        | 6.69  | 8.40  | 1.30 | 9.36<br>E-13 | 1.55<br>E-11 |
| 11345  | GABARA PL2 | GABA(A) receptor-associated protein-like 2                            | 10.98 | 12.32 | 1.30 | 8.58<br>E-14 | 1.84<br>E-12 |
| 3714   | JAG2       | jagged 2                                                              | 7.03  | 8.60  | 1.30 | 9.79<br>E-14 | 2.06<br>E-12 |
| 7750   | ZMYM2      | zinc finger, MYM-type 2                                               | 7.83  | 9.25  | 1.30 | 1.01<br>E-13 | 2.12<br>E-12 |
| 55034  | MOCOS      | molybdenum cofactor sulfurase                                         | 8.28  | 9.64  | 1.30 | 1.48<br>E-09 | 1.27<br>E-08 |
| 1717   | DHCR7      | 7-dehydrocholesterol reductase                                        | 8.21  | 9.58  | 1.29 | 1.61<br>E-08 | 1.14<br>E-07 |
| 23596  | OPN3       | opsin 3                                                               | 8.02  | 9.41  | 1.29 | 2.07<br>E-13 | 3.97<br>E-12 |
| 7043   | TGFB3      | transforming growth factor, beta 3                                    | 6.45  | 8.24  | 1.29 | 1.80<br>E-13 | 3.54<br>E-12 |
| 1629   | DBT        | dihydrolipoamide branched chain transacylase E2                       | 8.87  | 10.20 | 1.29 | 4.08<br>E-14 | 9.41<br>E-13 |
| 677800 | SNORA1 2   | small nucleolar RNA, H/ACA box 12                                     | 7.91  | 9.31  | 1.29 | 1.54<br>E-13 | 3.06<br>E-12 |
| 440270 | GOLGA8 B   | golgin A8 family, member B                                            | 8.54  | 9.88  | 1.29 | 5.76<br>E-13 | 9.95<br>E-12 |
| 178    | AGL        | amylo-alpha-1, 6-glucosidase, 4-alpha-glucanotransferase              | 7.47  | 8.93  | 1.29 | 3.75<br>E-13 | 6.77<br>E-12 |
| 7145   | TNS1       | tensin 1                                                              | 8.17  | 9.54  | 1.28 | 5.87<br>E-12 | 8.06<br>E-11 |
| 85461  | TANC1      | tetratricopeptide repeat, ankyrin repeat and coiled-coil containing 1 | 7.41  | 8.88  | 1.28 | 6.65<br>E-12 | 9.04<br>E-11 |
| 2194   | FASN       | fatty acid synthase                                                   | 10.39 | 11.68 | 1.28 | 1.55<br>E-08 | 1.10<br>E-07 |
| 4205   | MEF2A      | myocyte enhancer factor 2A                                            | 7.66  | 9.09  | 1.28 | 9.35<br>E-13 | 1.55<br>E-11 |
| 10628  | TXNIP      | thioredoxin interacting protein                                       | 10.79 | 12.11 | 1.28 | 3.65<br>E-13 | 6.62<br>E-12 |
| 4076   | CAPRIN1    | cell cycle associated                                                 | 8.91  | 10.23 | 1.28 | 1.52         | 3.84         |

|        |                |                                                                                              |       |       |      |              |              |
|--------|----------------|----------------------------------------------------------------------------------------------|-------|-------|------|--------------|--------------|
|        |                | protein 1                                                                                    |       |       |      | E-14         | E-13         |
| 55719  | FAM178<br>A    | family with sequence<br>similarity 178, member A                                             | 8.81  | 10.13 | 1.28 | 1.05<br>E-12 | 1.71<br>E-11 |
| 6309   | SC5DL          | sterol-C5-desaturase<br>(ERG3 delta-5-desaturase<br>homolog, <i>S. cerevisiae</i> )-<br>like | 9.07  | 10.37 | 1.28 | 8.07<br>E-10 | 7.28<br>E-09 |
| 51660  | BRP44L         | brain protein 44-like                                                                        | 8.95  | 10.26 | 1.27 | 1.04<br>E-13 | 2.16<br>E-12 |
| 8495   | PPFIBP2        | PTPRF interacting protein,<br>binding protein 2 (liprin<br>beta 2)                           | 6.44  | 8.21  | 1.27 | 1.36<br>E-12 | 2.16<br>E-11 |
| 441951 | NCRNA0<br>0275 | non-protein coding RNA<br>275                                                                | 11.58 | 12.91 | 1.27 | 3.05<br>E-14 | 7.23<br>E-13 |
| 10570  | DPYSL4         | dihydropyrimidinase-like 4                                                                   | 9.04  | 10.34 | 1.27 | 2.46<br>E-13 | 4.63<br>E-12 |
| 1281   | COL3A1         | collagen, type III, alpha 1                                                                  | 10.37 | 11.66 | 1.27 | 1.11<br>E-12 | 1.80<br>E-11 |
| 10765  | KDM5B          | lysine (K)-specific<br>demethylase 5B                                                        | 8.48  | 9.80  | 1.27 | 1.14<br>E-13 | 2.34<br>E-12 |
| 10443  | N4BP2L2        | NEDD4 binding protein 2-<br>like 2                                                           | 8.25  | 9.59  | 1.27 | 1.49<br>E-13 | 2.97<br>E-12 |
| 65249  | ZSWIM4         | zinc finger, SWIM-type<br>containing 4                                                       | 7.93  | 9.32  | 1.27 | 4.88<br>E-13 | 8.55<br>E-12 |
| 8522   | GAS7           | growth arrest-specific 7                                                                     | 6.29  | 8.09  | 1.27 | 1.20<br>E-13 | 2.45<br>E-12 |
| 6773   | STAT2          | signal transducer and<br>activator of transcription 2,<br>113kDa                             | 9.40  | 10.67 | 1.27 | 8.40<br>E-13 | 1.41<br>E-11 |
| 387914 | SHISA2         | shisa homolog 2 ( <i>Xenopus<br/>laevis</i> )                                                | 10.12 | 11.36 | 1.27 | 3.20<br>E-12 | 4.66<br>E-11 |
| 1612   | DAPK1          | death-associated protein<br>kinase 1                                                         | 7.03  | 8.57  | 1.27 | 1.77<br>E-12 | 2.75<br>E-11 |
| 57161  | PELI2          | pellino homolog 2<br>( <i>Drosophila</i> )                                                   | 6.37  | 8.15  | 1.27 | 7.80<br>E-15 | 2.07<br>E-13 |
| 3759   | KCNJ2          | potassium inwardly-<br>rectifying channel,<br>subfamily J, member 2                          | 6.48  | 8.23  | 1.27 | 8.94<br>E-14 | 1.91<br>E-12 |
| 66000  | TMEM10<br>8    | transmembrane protein 108                                                                    | 8.22  | 9.56  | 1.27 | 8.11<br>E-13 | 1.36<br>E-11 |
| 6301   | SARS           | seryl-tRNA synthetase                                                                        | 9.51  | 10.78 | 1.27 | 2.68<br>E-12 | 3.97<br>E-11 |
| 5723   | PSPH           | phosphoserine phosphatase                                                                    | 8.36  | 9.68  | 1.27 | 4.69<br>E-08 | 3.06<br>E-07 |
| 31     | ACACA          | acetyl-CoA carboxylase<br>alpha                                                              | 8.23  | 9.57  | 1.26 | 9.24<br>E-12 | 1.21<br>E-10 |
| 8527   | DGKD           | diacylglycerol kinase, delta<br>130kDa                                                       | 7.13  | 8.64  | 1.26 | 4.47<br>E-14 | 1.02<br>E-12 |

|        |          |                                                                                            |       |       |      |              |              |
|--------|----------|--------------------------------------------------------------------------------------------|-------|-------|------|--------------|--------------|
| 1778   | DYNC1H1  | dynein, cytoplasmic 1, heavy chain 1                                                       | 9.23  | 10.49 | 1.26 | 2.22<br>E-09 | 1.85<br>E-08 |
| 53346  | TM6SF1   | transmembrane 6 superfamily member 1                                                       | 6.62  | 8.31  | 1.26 | 3.44<br>E-09 | 2.75<br>E-08 |
| 9056   | SLC7A7   | solute carrier family 7 (cationic amino acid transporter, y <sup>+</sup> system), member 7 | 7.07  | 8.58  | 1.26 | 6.15<br>E-11 | 6.89<br>E-10 |
| 10577  | NPC2     | Niemann-Pick disease, type C2                                                              | 11.20 | 12.48 | 1.25 | 5.53<br>E-12 | 7.62<br>E-11 |
| 10600  | USP16    | ubiquitin specific peptidase 16                                                            | 6.70  | 8.36  | 1.25 | 6.27<br>E-14 | 1.39<br>E-12 |
| 55924  | C1orf183 | chromosome 1 open reading frame 183                                                        | 6.56  | 8.27  | 1.25 | 1.01<br>E-13 | 2.11<br>E-12 |
| 2766   | GMPR     | guanosine monophosphate reductase                                                          | 7.00  | 8.52  | 1.25 | 2.29<br>E-13 | 4.33<br>E-12 |
| 80790  | CMIP     | c-Maf-inducing protein                                                                     | 10.00 | 11.21 | 1.25 | 7.40<br>E-14 | 1.61<br>E-12 |
| 8975   | USP13    | ubiquitin specific peptidase 13 (isopeptidase T-3)                                         | 8.38  | 9.68  | 1.25 | 1.76<br>E-13 | 3.45<br>E-12 |
| 23645  | PPP1R15A | protein phosphatase 1, regulatory (inhibitor) subunit 15A                                  | 10.19 | 11.40 | 1.25 | 2.39<br>E-13 | 4.51<br>E-12 |
| 51646  | YPEL5    | yippee-like 5 (Drosophila)                                                                 | 9.56  | 10.81 | 1.25 | 1.08<br>E-13 | 2.23<br>E-12 |
| 147906 | DACT3    | dapper, antagonist of beta-catenin, homolog 3 (Xenopus laevis)                             | 6.69  | 8.34  | 1.25 | 3.59<br>E-13 | 6.50<br>E-12 |
| 389125 | MUSTN1   | musculoskeletal, embryonic nuclear protein 1                                               | 6.69  | 8.33  | 1.24 | 8.25<br>E-14 | 1.78<br>E-12 |
| 5226   | PGD      | phosphogluconate dehydrogenase                                                             | 10.96 | 12.24 | 1.24 | 6.20<br>E-13 | 1.06<br>E-11 |
| 162394 | SLFN5    | schlafen family member 5                                                                   | 7.76  | 9.13  | 1.24 | 1.83<br>E-09 | 1.54<br>E-08 |
| 4921   | DDR2     | discoidin domain receptor tyrosine kinase 2                                                | 8.51  | 9.79  | 1.23 | 1.07<br>E-10 | 1.15<br>E-09 |
| 54873  | PALMD    | palmdelphin                                                                                | 7.80  | 9.16  | 1.23 | 1.43<br>E-13 | 2.87<br>E-12 |
| 55084  | SOBP     | sine oculis binding protein homolog (Drosophila)                                           | 6.56  | 8.25  | 1.23 | 7.83<br>E-10 | 7.10<br>E-09 |
| 1495   | CTNNA1   | catenin (cadherin-associated protein), alpha 1, 102kDa                                     | 10.90 | 12.16 | 1.23 | 5.55<br>E-14 | 1.24<br>E-12 |
| 2634   | GBP2     | guanylate binding protein 2, interferon-inducible                                          | 8.25  | 9.55  | 1.23 | 2.23<br>E-12 | 3.38<br>E-11 |
| 204    | AK2      | adenylate kinase 2                                                                         | 10.69 | 11.94 | 1.23 | 7.84<br>E-13 | 1.32<br>E-11 |
| 51438  | MAGEC2   | melanoma antigen family                                                                    | 6.50  | 8.20  | 1.23 | 6.10         | 5.62         |

|        |          |                                                                    |       |       |      |              |              |
|--------|----------|--------------------------------------------------------------------|-------|-------|------|--------------|--------------|
|        |          | C, 2                                                               |       |       |      | E-10         | E-09         |
| 10580  | SORBS1   | sorbin and SH3 domain containing 1                                 | 6.65  | 8.30  | 1.23 | 1.69<br>E-13 | 3.33<br>E-12 |
| 84216  | TMEM117  | transmembrane protein 117                                          | 7.41  | 8.82  | 1.23 | 6.27<br>E-14 | 1.39<br>E-12 |
| 8544   | PIR      | pirin (iron-binding nuclear protein)                               | 7.77  | 9.12  | 1.23 | 3.90<br>E-12 | 5.57<br>E-11 |
| 341    | APOC1    | apolipoprotein C-I                                                 | 7.04  | 8.52  | 1.22 | 8.30<br>E-09 | 6.20<br>E-08 |
| 84814  | PPAPDC3  | phosphatidic acid phosphatase type 2 domain containing 3           | 8.17  | 9.48  | 1.22 | 4.02<br>E-14 | 9.32<br>E-13 |
| 63908  | NAPB     | N-ethylmaleimide-sensitive factor attachment protein, beta         | 7.98  | 9.31  | 1.22 | 1.45<br>E-13 | 2.90<br>E-12 |
| 3831   | KLC1     | kinesin light chain 1                                              | 9.43  | 10.65 | 1.22 | 1.01<br>E-12 | 1.67<br>E-11 |
| 55852  | TEX2     | testis expressed 2                                                 | 8.90  | 10.15 | 1.22 | 6.07<br>E-14 | 1.35<br>E-12 |
| 7707   | ZNF148   | zinc finger protein 148                                            | 8.95  | 10.20 | 1.22 | 7.67<br>E-12 | 1.03<br>E-10 |
| 66008  | TRAK2    | trafficking protein, kinesin binding 2                             | 10.26 | 11.48 | 1.22 | 1.42<br>E-10 | 1.48<br>E-09 |
| 10253  | SPRY2    | sprouty homolog 2 (Drosophila)                                     | 9.42  | 10.64 | 1.22 | 1.51<br>E-13 | 3.00<br>E-12 |
| 116987 | AGAP1    | ArfGAP with GTPase domain, ankyrin repeat and PH domain 1          | 8.30  | 9.58  | 1.22 | 4.23<br>E-14 | 9.70<br>E-13 |
| 58497  | PRUNE    | prune homolog (Drosophila)                                         | 7.51  | 8.89  | 1.22 | 2.41<br>E-14 | 5.78<br>E-13 |
| 23077  | MYCBP2   | MYC binding protein 2                                              | 7.45  | 8.83  | 1.21 | 3.92<br>E-10 | 3.74<br>E-09 |
| 401237 | FLJ22536 | hypothetical locus LOC401237                                       | 6.80  | 8.37  | 1.21 | 1.02<br>E-13 | 2.13<br>E-12 |
| 55915  | LANCL2   | LanC lantibiotic synthetase component C-like 2 (bacterial)         | 8.12  | 9.42  | 1.21 | 1.98<br>E-13 | 3.82<br>E-12 |
| 2254   | FGF9     | fibroblast growth factor 9 (glia-activating factor)                | 6.82  | 8.38  | 1.21 | 1.80<br>E-12 | 2.79<br>E-11 |
| 89801  | PPP1R3F  | protein phosphatase 1, regulatory (inhibitor) subunit 3F           | 6.96  | 8.46  | 1.21 | 3.69<br>E-13 | 6.67<br>E-12 |
| 55151  | TMEM38B  | transmembrane protein 38B                                          | 7.63  | 8.98  | 1.21 | 3.29<br>E-12 | 4.78<br>E-11 |
| 1601   | DAB2     | disabled homolog 2, mitogen-responsive phosphoprotein (Drosophila) | 10.02 | 11.19 | 1.21 | 2.40<br>E-11 | 2.88<br>E-10 |
| 10043  | TOM1     | target of myb1 (chicken)                                           | 9.13  | 10.35 | 1.21 | 1.50         | 2.36         |

|        |             |                                                                                              |       |       |      |      |      |
|--------|-------------|----------------------------------------------------------------------------------------------|-------|-------|------|------|------|
|        |             |                                                                                              |       |       |      | E-12 | E-11 |
| 10763  | NES         | nestin                                                                                       | 12.20 | 13.49 | 1.21 | 9.66 | 1.26 |
|        |             |                                                                                              |       |       |      | E-12 | E-10 |
| 3422   | IDI1        | isopentenyl-diphosphate<br>delta isomerase 1                                                 | 8.09  | 9.39  | 1.21 | 3.41 | 3.30 |
|        |             |                                                                                              |       |       |      | E-10 | E-09 |
| 7296   | TXNRD1      | thioredoxin reductase 1                                                                      | 10.71 | 11.94 | 1.21 | 3.53 | 4.11 |
|        |             |                                                                                              |       |       |      | E-11 | E-10 |
| 160518 | DENND5<br>B | DENN/MADD domain<br>containing 5B                                                            | 7.29  | 8.69  | 1.20 | 1.51 | 3.01 |
|        |             |                                                                                              |       |       |      | E-13 | E-12 |
| 22933  | SIRT2       | sirtuin 2                                                                                    | 7.77  | 9.10  | 1.20 | 2.03 | 3.92 |
|        |             |                                                                                              |       |       |      | E-13 | E-12 |
| 4097   | MAFG        | v-maf musculoaponeurotic<br>fibrosarcoma oncogene<br>homolog G (avian)                       | 7.48  | 8.85  | 1.20 | 1.21 | 2.48 |
|        |             |                                                                                              |       |       |      | E-13 | E-12 |
| 55227  | LRRC1       | leucine rich repeat<br>containing 1                                                          | 7.73  | 9.07  | 1.20 | 3.05 | 4.45 |
|        |             |                                                                                              |       |       |      | E-12 | E-11 |
| 3376   | IARS        | isoleucyl-tRNA synthetase                                                                    | 10.08 | 11.26 | 1.20 | 1.05 | 1.36 |
|        |             |                                                                                              |       |       |      | E-11 | E-10 |
| 125050 | RN7SK       | RNA, 7SK small nuclear                                                                       | 6.99  | 8.46  | 1.20 | 8.93 | 1.49 |
|        |             |                                                                                              |       |       |      | E-13 | E-11 |
| 1634   | DCN         | decorin                                                                                      | 7.93  | 9.23  | 1.20 | 2.98 | 3.53 |
|        |             |                                                                                              |       |       |      | E-11 | E-10 |
| 25937  | WWTR1       | WW domain containing<br>transcription regulator 1                                            | 6.95  | 8.44  | 1.20 | 1.07 | 2.20 |
|        |             |                                                                                              |       |       |      | E-13 | E-12 |
| 6913   | TBX15       | T-box 15                                                                                     | 7.49  | 8.85  | 1.20 | 1.13 | 1.46 |
|        |             |                                                                                              |       |       |      | E-11 | E-10 |
| 1031   | CDKN2C      | cyclin-dependent kinase<br>inhibitor 2C (p18, inhibits<br>CDK4)                              | 8.45  | 9.69  | 1.20 | 9.02 | 1.50 |
|        |             |                                                                                              |       |       |      | E-13 | E-11 |
| 9200   | PTPLA       | protein tyrosine<br>phosphatase-like (proline<br>instead of catalytic<br>arginine), member A | 10.23 | 11.40 | 1.20 | 9.90 | 1.64 |
|        |             |                                                                                              |       |       |      | E-13 | E-11 |
| 6472   | SHMT2       | serine<br>hydroxymethyltransferase<br>2 (mitochondrial)                                      | 11.29 | 12.51 | 1.19 | 1.87 | 3.64 |
|        |             |                                                                                              |       |       |      | E-13 | E-12 |
| 90203  | SNX21       | sorting nexin family<br>member 21                                                            | 7.78  | 9.10  | 1.19 | 6.39 | 1.09 |
|        |             |                                                                                              |       |       |      | E-13 | E-11 |
| 90     | ACVR1       | activin A receptor, type I                                                                   | 9.47  | 10.67 | 1.19 | 2.54 | 3.78 |
|        |             |                                                                                              |       |       |      | E-12 | E-11 |
| 183    | AGT         | angiotensinogen (serpin<br>peptidase inhibitor, clade<br>A, member 8)                        | 6.35  | 8.04  | 1.19 | 4.90 | 1.11 |
|        |             |                                                                                              |       |       |      | E-14 | E-12 |
| 51621  | KLF13       | Kruppel-like factor 13                                                                       | 8.69  | 9.93  | 1.19 | 4.43 | 7.85 |
|        |             |                                                                                              |       |       |      | E-13 | E-12 |
| 8555   | CDC14B      | CDC14 cell division cycle<br>14 homolog B (S.<br>cerevisiae)                                 | 7.85  | 9.16  | 1.19 | 7.25 | 1.23 |
|        |             |                                                                                              |       |       |      | E-13 | E-11 |
| 7324   | UBE2E1      | ubiquitin-conjugating<br>enzyme E2E 1 (UBC4/5                                                | 10.84 | 12.05 | 1.19 | 9.53 | 1.58 |

|        |           |                                                                                  |       |       |      |              |              |
|--------|-----------|----------------------------------------------------------------------------------|-------|-------|------|--------------|--------------|
|        |           | homolog, yeast)                                                                  |       |       |      | E-13         | E-11         |
| 401152 | C4orf3    | chromosome 4 open reading frame 3                                                | 9.71  | 10.89 | 1.19 | 2.99<br>E-13 | 5.53<br>E-12 |
| 2273   | FHL1      | four and a half LIM domains 1                                                    | 9.49  | 10.68 | 1.19 | 1.08<br>E-12 | 1.75<br>E-11 |
| 23630  | KCNE1L    | KCNE1-like                                                                       | 6.78  | 8.33  | 1.19 | 5.64<br>E-13 | 9.75<br>E-12 |
| 25798  | BRI3      | brain protein I3                                                                 | 11.03 | 12.27 | 1.19 | 4.91<br>E-12 | 6.87<br>E-11 |
| 3125   | HLA-DRB3  | major histocompatibility complex, class II, DR beta 3                            | 8.05  | 9.34  | 1.19 | 1.03<br>E-12 | 1.70<br>E-11 |
| 6774   | STAT3     | signal transducer and activator of transcription 3 (acute-phase response factor) | 8.43  | 9.67  | 1.19 | 3.97<br>E-12 | 5.65<br>E-11 |
| 51523  | CXXC5     | CXXC finger protein 5                                                            | 11.38 | 12.60 | 1.19 | 4.64<br>E-13 | 8.17<br>E-12 |
| 2180   | ACSL1     | acyl-CoA synthetase long-chain family member 1                                   | 7.59  | 8.91  | 1.18 | 5.63<br>E-13 | 9.74<br>E-12 |
| 6445   | SGCG      | sarcoglycan, gamma (35kDa dystrophin-associated glycoprotein)                    | 6.36  | 8.04  | 1.18 | 1.84<br>E-13 | 3.59<br>E-12 |
| 1842   | ECM2      | extracellular matrix protein 2, female organ and adipocyte specific              | 6.34  | 8.02  | 1.18 | 7.61<br>E-11 | 8.37<br>E-10 |
| 84557  | MAP1LC3A  | microtubule-associated protein 1 light chain 3 alpha                             | 10.20 | 11.35 | 1.18 | 4.58<br>E-13 | 8.09<br>E-12 |
| 122809 | SOCS4     | suppressor of cytokine signaling 4                                               | 7.17  | 8.58  | 1.18 | 1.73<br>E-12 | 2.69<br>E-11 |
| 63876  | PKNOX2    | PBX/knotted 1 homeobox 2                                                         | 7.96  | 9.24  | 1.18 | 7.66<br>E-14 | 1.66<br>E-12 |
| 1013   | CDH15     | cadherin 15, type 1, M-cadherin (myotubule)                                      | 11.96 | 13.20 | 1.17 | 1.36<br>E-11 | 1.73<br>E-10 |
| 3017   | HIST1H2BD | histone cluster 1, H2bd                                                          | 6.42  | 8.07  | 1.17 | 7.40<br>E-14 | 1.61<br>E-12 |
| 6167   | RPL37     | ribosomal protein L37                                                            | 7.68  | 8.99  | 1.17 | 2.53<br>E-11 | 3.02<br>E-10 |
| 818    | CAMK2G    | calcium/calmodulin-dependent protein kinase II gamma                             | 8.35  | 9.58  | 1.17 | 7.45<br>E-13 | 1.26<br>E-11 |
| 1959   | EGR2      | early growth response 2                                                          | 6.62  | 8.22  | 1.17 | 6.07<br>E-11 | 6.81<br>E-10 |
| 27190  | IL17B     | interleukin 17B                                                                  | 6.27  | 7.95  | 1.17 | 1.46<br>E-11 | 1.84<br>E-10 |
| 115    | ADCY9     | adenylate cyclase 9                                                              | 7.19  | 8.58  | 1.17 | 4.05<br>E-14 | 9.37<br>E-13 |
| 115207 | KCTD12    | potassium channel tetramerisation domain                                         | 8.61  | 9.83  | 1.17 | 5.11         | 5.82         |

|               |               |                                                                                                      |       |       |      |              |              |
|---------------|---------------|------------------------------------------------------------------------------------------------------|-------|-------|------|--------------|--------------|
|               |               | containing 12                                                                                        |       |       |      | E-11         | E-10         |
| 100129<br>885 | SCXA          | scleraxis homolog A<br>(mouse)                                                                       | 6.68  | 8.25  | 1.17 | 2.00<br>E-12 | 3.08<br>E-11 |
| 3689          | ITGB2         | integrin, beta 2<br>(complement component 3<br>receptor 3 and 4 subunit)                             | 7.95  | 9.22  | 1.17 | 1.54<br>E-13 | 3.06<br>E-12 |
| 114902        | C1QTNF5       | C1q and tumor necrosis<br>factor related protein 5                                                   | 8.02  | 9.28  | 1.16 | 1.20<br>E-11 | 1.54<br>E-10 |
| 10513         | APPBP2        | amyloid beta precursor<br>protein (cytoplasmic tail)<br>binding protein 2                            | 8.77  | 9.97  | 1.16 | 1.86<br>E-13 | 3.62<br>E-12 |
| 291           | SLC25A4       | solute carrier family 25<br>(mitochondrial carrier;<br>adenine nucleotide<br>translocator), member 4 | 9.94  | 11.08 | 1.16 | 3.38<br>E-11 | 3.95<br>E-10 |
| 27231         | ITGB1BP<br>3  | integrin beta 1 binding<br>protein 3                                                                 | 6.58  | 8.17  | 1.16 | 3.09<br>E-13 | 5.70<br>E-12 |
| 351           | APP           | amyloid beta (A4)<br>precursor protein                                                               | 9.37  | 10.53 | 1.15 | 2.38<br>E-10 | 2.36<br>E-09 |
| 2805          | GOT1          | glutamic-oxaloacetic<br>transaminase 1, soluble<br>(aspartate aminotransferase<br>1)                 | 9.96  | 11.09 | 1.15 | 7.26<br>E-11 | 8.03<br>E-10 |
| 23062         | GGA2          | golgi-associated, gamma<br>adaptin ear containing,<br>ARF binding protein 2                          | 7.53  | 8.83  | 1.15 | 1.86<br>E-13 | 3.62<br>E-12 |
| 119032        | C10orf32      | chromosome 10 open<br>reading frame 32                                                               | 7.97  | 9.22  | 1.15 | 2.14<br>E-13 | 4.08<br>E-12 |
| 1051          | CEBPB         | CCAAT/enhancer binding<br>protein (C/EBP), beta                                                      | 11.03 | 12.22 | 1.15 | 7.11<br>E-11 | 7.88<br>E-10 |
| 119710        | C11orf74      | chromosome 11 open<br>reading frame 74                                                               | 9.51  | 10.66 | 1.15 | 3.21<br>E-12 | 4.67<br>E-11 |
| 1054          | CEBPG         | CCAAT/enhancer binding<br>protein (C/EBP), gamma                                                     | 8.68  | 9.87  | 1.15 | 4.76<br>E-09 | 3.71<br>E-08 |
| 80232         | WDR26         | WD repeat domain 26                                                                                  | 8.18  | 9.41  | 1.15 | 4.00<br>E-12 | 5.69<br>E-11 |
| 23332         | CLASP1        | cytoplasmic linker<br>associated protein 1                                                           | 8.35  | 9.55  | 1.14 | 4.75<br>E-12 | 6.66<br>E-11 |
| 9127          | P2RX6         | purinergic receptor P2X,<br>ligand-gated ion channel, 6                                              | 7.88  | 9.13  | 1.14 | 1.81<br>E-10 | 1.84<br>E-09 |
| 112752        | C14orf17<br>9 | chromosome 14 open<br>reading frame 179                                                              | 8.73  | 9.92  | 1.14 | 1.42<br>E-12 | 2.26<br>E-11 |
| 10464         | PIBF1         | progesterone<br>immunomodulatory<br>binding factor 1                                                 | 7.47  | 8.77  | 1.14 | 8.42<br>E-12 | 1.12<br>E-10 |
| 9581          | PREPL         | prolyl endopeptidase-like                                                                            | 7.45  | 8.75  | 1.14 | 7.26<br>E-11 | 8.03<br>E-10 |
| 55298         | RNF121        | ring finger protein 121                                                                              | 9.25  | 10.40 | 1.14 | 1.26<br>E-11 | 1.61<br>E-10 |



|               |              |                                                                                                                |       |       |      |              |              |
|---------------|--------------|----------------------------------------------------------------------------------------------------------------|-------|-------|------|--------------|--------------|
| 126969        | SLC44A3      | solute carrier family 44, member 3                                                                             | 7.01  | 8.41  | 1.14 | 1.27<br>E-11 | 1.62<br>E-10 |
| 114876        | OSBPL1<br>A  | oxysterol binding protein-like 1A                                                                              | 8.55  | 9.73  | 1.14 | 2.45<br>E-12 | 3.67<br>E-11 |
| 57609         | DIP2B        | DIP2 disco-interacting protein 2 homolog B (Drosophila)                                                        | 8.00  | 9.23  | 1.14 | 8.19<br>E-11 | 8.97<br>E-10 |
| 54507         | ADAMTS<br>L4 | ADAMTS-like 4                                                                                                  | 7.57  | 8.84  | 1.13 | 6.99<br>E-13 | 1.19<br>E-11 |
| 7108          | TM7SF2       | transmembrane 7 superfamily member 2                                                                           | 6.50  | 8.09  | 1.13 | 3.48<br>E-10 | 3.36<br>E-09 |
| 9788          | MTSS1        | metastasis suppressor 1                                                                                        | 7.72  | 8.98  | 1.13 | 3.92<br>E-13 | 7.03<br>E-12 |
| 57493         | HEG1         | HEG homolog 1 (zebrafish)                                                                                      | 8.54  | 9.71  | 1.13 | 7.77<br>E-10 | 7.05<br>E-09 |
| 196483        | FAM86A       | family with sequence similarity 86, member A                                                                   | 6.61  | 8.16  | 1.13 | 3.57<br>E-11 | 4.16<br>E-10 |
| 10087         | COL4A3<br>BP | collagen, type IV, alpha 3 (Goodpasture antigen) binding protein                                               | 6.96  | 8.37  | 1.13 | 9.01<br>E-11 | 9.79<br>E-10 |
| 9215          | LARGE        | like-glycosyltransferase                                                                                       | 7.92  | 9.15  | 1.13 | 4.35<br>E-13 | 7.72<br>E-12 |
| 91461         | PKDCC        | protein kinase domain containing, cytoplasmic homolog (mouse)                                                  | 6.85  | 8.31  | 1.13 | 2.37<br>E-11 | 2.85<br>E-10 |
| 2064          | ERBB2        | v-erb-b2 erythroblastic leukemia viral oncogene homolog 2, neuro/glioblastoma derived oncogene homolog (avian) | 9.20  | 10.33 | 1.13 | 1.30<br>E-12 | 2.07<br>E-11 |
| 50854         | C6orf48      | chromosome 6 open reading frame 48                                                                             | 11.73 | 12.89 | 1.12 | 2.06<br>E-12 | 3.16<br>E-11 |
| 55573         | CDV3         | CDV3 homolog (mouse)                                                                                           | 10.50 | 11.62 | 1.12 | 3.05<br>E-13 | 5.63<br>E-12 |
| 143458        | LDLRAD<br>3  | low density lipoprotein receptor class A domain containing 3                                                   | 7.25  | 8.58  | 1.12 | 3.69<br>E-12 | 5.29<br>E-11 |
| 7188          | TRAF5        | TNF receptor-associated factor 5                                                                               | 7.19  | 8.52  | 1.12 | 6.88<br>E-13 | 1.17<br>E-11 |
| 100133<br>941 | CD24         | CD24 molecule                                                                                                  | 7.41  | 8.70  | 1.12 | 3.01<br>E-12 | 4.40<br>E-11 |
| 10133         | OPTN         | optineurin                                                                                                     | 8.49  | 9.65  | 1.11 | 1.00<br>E-11 | 1.30<br>E-10 |
| 166614        | DCLK2        | doublecortin-like kinase 2                                                                                     | 6.93  | 8.34  | 1.11 | 4.64<br>E-11 | 5.32<br>E-10 |
| 3913          | LAMB2        | laminin, beta 2 (laminin S)                                                                                    | 8.13  | 9.33  | 1.11 | 7.73<br>E-13 | 1.30<br>E-11 |
| 3992          | FADS1        | fatty acid desaturase 1                                                                                        | 9.70  | 10.81 | 1.11 | 2.02<br>E-09 | 1.69<br>E-08 |

|        |          |                                                                         |       |       |      |              |              |
|--------|----------|-------------------------------------------------------------------------|-------|-------|------|--------------|--------------|
| 26018  | LRIG1    | leucine-rich repeats and immunoglobulin-like domains 1                  | 6.78  | 8.24  | 1.11 | 1.64<br>E-12 | 2.56<br>E-11 |
| 23513  | SCRIB    | scribbled homolog (Drosophila)                                          | 9.22  | 10.34 | 1.11 | 2.94<br>E-13 | 5.44<br>E-12 |
| 79929  | MAP6D1   | MAP6 domain containing 1                                                | 8.21  | 9.39  | 1.10 | 2.85<br>E-12 | 4.19<br>E-11 |
| 80024  | SLC24A6  | solute carrier family 24 (sodium/potassium/calcium exchanger), member 6 | 7.94  | 9.13  | 1.10 | 2.26<br>E-13 | 4.29<br>E-12 |
| 135112 | NCOA7    | nuclear receptor coactivator 7                                          | 7.81  | 9.03  | 1.10 | 1.01<br>E-13 | 2.12<br>E-12 |
| 1523   | CUX1     | cut-like homeobox 1                                                     | 7.52  | 8.78  | 1.10 | 5.44<br>E-10 | 5.07<br>E-09 |
| 56985  | C17orf48 | chromosome 17 open reading frame 48                                     | 7.94  | 9.14  | 1.10 | 1.71<br>E-12 | 2.66<br>E-11 |
| 25831  | HECTD1   | HECT domain containing 1                                                | 9.37  | 10.47 | 1.10 | 3.77<br>E-10 | 3.61<br>E-09 |
| 4192   | MDK      | midkine (neurite growth-promoting factor 2)                             | 10.17 | 11.24 | 1.10 | 1.79<br>E-10 | 1.83<br>E-09 |
| 201164 | PLD6     | phospholipase D family, member 6                                        | 7.74  | 8.96  | 1.10 | 2.26<br>E-11 | 2.73<br>E-10 |
| 54993  | ZSCAN2   | zinc finger and SCAN domain containing 2                                | 7.66  | 8.89  | 1.10 | 2.52<br>E-12 | 3.76<br>E-11 |
| 23162  | MAPK8IP3 | mitogen-activated protein kinase 8 interacting protein 3                | 7.86  | 9.07  | 1.10 | 5.28<br>E-12 | 7.31<br>E-11 |
| 79901  | CYBRD1   | cytochrome b reductase 1                                                | 10.29 | 11.37 | 1.10 | 5.62<br>E-13 | 9.73<br>E-12 |
| 55323  | LARP6    | La ribonucleoprotein domain family, member 6                            | 8.81  | 9.94  | 1.10 | 2.79<br>E-07 | 1.56<br>E-06 |
| 8671   | SLC4A4   | solute carrier family 4, sodium bicarbonate cotransporter, member 4     | 6.71  | 8.18  | 1.09 | 9.52<br>E-11 | 1.03<br>E-09 |
| 1756   | DMD      | dystrophin                                                              | 6.70  | 8.17  | 1.09 | 2.30<br>E-13 | 4.35<br>E-12 |
| 8874   | ARHGEF7  | Rho guanine nucleotide exchange factor (GEF) 7                          | 9.05  | 10.17 | 1.09 | 1.22<br>E-11 | 1.56<br>E-10 |
| 10742  | RAI2     | retinoic acid induced 2                                                 | 6.63  | 8.13  | 1.09 | 1.63<br>E-11 | 2.04<br>E-10 |
| 3720   | JARID2   | jumonji, AT rich interactive domain 2                                   | 7.93  | 9.13  | 1.09 | 2.25<br>E-12 | 3.40<br>E-11 |
| 84268  | RPAIN    | RPA interacting protein                                                 | 10.03 | 11.10 | 1.09 | 1.03<br>E-11 | 1.34<br>E-10 |
| 9931   | HELZ     | helicase with zinc finger                                               | 7.40  | 8.67  | 1.08 | 1.17<br>E-10 | 1.24<br>E-09 |
| 51207  | DUSP13   | dual specificity phosphatase 13                                         | 7.65  | 8.86  | 1.08 | 7.19<br>E-11 | 7.95<br>E-10 |

|        |          |                                                                                |       |       |      |              |              |
|--------|----------|--------------------------------------------------------------------------------|-------|-------|------|--------------|--------------|
| 259217 | HSPA12A  | heat shock 70kDa protein 12A                                                   | 8.15  | 9.31  | 1.08 | 6.12<br>E-13 | 1.05<br>E-11 |
| 3029   | HAGH     | hydroxyacylglutathione hydrolase                                               | 9.49  | 10.58 | 1.08 | 1.40<br>E-12 | 2.22<br>E-11 |
| 78999  | LRFN4    | leucine rich repeat and fibronectin type III domain containing 4               | 7.41  | 8.67  | 1.08 | 2.18<br>E-12 | 3.32<br>E-11 |
| 115294 | PCMTD1   | protein-L-isoaspartate (D-aspartate) O-methyltransferase domain containing 1   | 7.98  | 9.16  | 1.08 | 9.54<br>E-12 | 1.25<br>E-10 |
| 8707   | B3GALT2  | UDP-Gal:betaGlcNAc beta 1,3-galactosyltransferase, polypeptide 2               | 7.88  | 9.07  | 1.08 | 2.38<br>E-11 | 2.86<br>E-10 |
| 23387  | SIK3     | SIK family kinase 3                                                            | 8.26  | 9.40  | 1.07 | 1.68<br>E-11 | 2.08<br>E-10 |
| 114789 | SLC25A25 | solute carrier family 25 (mitochondrial carrier; phosphate carrier), member 25 | 8.83  | 9.94  | 1.07 | 7.32<br>E-13 | 1.24<br>E-11 |
| 9915   | ARNT2    | aryl-hydrocarbon receptor nuclear translocator 2                               | 8.15  | 9.30  | 1.07 | 6.28<br>E-10 | 5.78<br>E-09 |
| 113146 | AHNAK2   | AHNAK nucleoprotein 2                                                          | 7.97  | 9.14  | 1.07 | 4.76<br>E-07 | 2.56<br>E-06 |
| 55508  | SLC35E3  | solute carrier family 35, member E3                                            | 8.86  | 9.97  | 1.07 | 3.47<br>E-13 | 6.31<br>E-12 |
| 29903  | CCDC106  | coiled-coil domain containing 106                                              | 8.32  | 9.45  | 1.07 | 2.56<br>E-12 | 3.81<br>E-11 |
| 83707  | TRPT1    | tRNA phosphotransferase 1                                                      | 9.72  | 10.80 | 1.07 | 2.09<br>E-12 | 3.19<br>E-11 |
| 90161  | HS6ST2   | heparan sulfate 6-O-sulfotransferase 2                                         | 6.99  | 8.33  | 1.07 | 4.28<br>E-10 | 4.06<br>E-09 |
| 4239   | MFAP4    | microfibrillar-associated protein 4                                            | 6.80  | 8.21  | 1.07 | 8.87<br>E-12 | 1.17<br>E-10 |
| 1153   | CIRBP    | cold inducible RNA binding protein                                             | 11.92 | 13.03 | 1.07 | 2.87<br>E-11 | 3.40<br>E-10 |
| 9240   | PNMA1    | paraneoplastic antigen MA1                                                     | 8.58  | 9.68  | 1.07 | 1.79<br>E-12 | 2.77<br>E-11 |
| 445    | ASS1     | argininosuccinate synthase 1                                                   | 10.35 | 11.41 | 1.07 | 4.00<br>E-12 | 5.69<br>E-11 |
| 5495   | PPM1B    | protein phosphatase, Mg <sup>2+</sup> /Mn <sup>2+</sup> dependent, 1B          | 8.53  | 9.63  | 1.07 | 7.08<br>E-11 | 7.85<br>E-10 |
| 9771   | RAPGEF5  | Rap guanine nucleotide exchange factor (GEF) 5                                 | 6.62  | 8.09  | 1.06 | 8.53<br>E-11 | 9.30<br>E-10 |
| 84939  | MUM1     | melanoma associated antigen (mutated) 1                                        | 9.04  | 10.14 | 1.06 | 9.84<br>E-12 | 1.28<br>E-10 |
| 23352  | UBR4     | ubiquitin protein ligase E3 component n-recogin 4                              | 7.95  | 9.12  | 1.06 | 4.99<br>E-10 | 4.68<br>E-09 |

|        |           |                                                                              |       |       |      |              |              |
|--------|-----------|------------------------------------------------------------------------------|-------|-------|------|--------------|--------------|
| 23270  | TSPYL4    | TSPY-like 4                                                                  | 7.39  | 8.63  | 1.06 | 8.60<br>E-13 | 1.44<br>E-11 |
| 91694  | LONRF1    | LON peptidase N-terminal domain and ring finger 1                            | 6.94  | 8.29  | 1.06 | 6.88<br>E-13 | 1.17<br>E-11 |
| 79573  | TTC13     | tetratricopeptide repeat domain 13                                           | 8.21  | 9.35  | 1.06 | 4.71<br>E-12 | 6.62<br>E-11 |
| 79745  | CLIP4     | CAP-GLY domain containing linker protein family, member 4                    | 7.75  | 8.93  | 1.06 | 1.65<br>E-11 | 2.05<br>E-10 |
| 11096  | ADAMTS 5  | ADAM metallopeptidase with thrombospondin type 1 motif, 5                    | 6.58  | 8.06  | 1.06 | 2.23<br>E-12 | 3.38<br>E-11 |
| 10801  | 9-Sep     | septin 9                                                                     | 12.66 | 13.84 | 1.06 | 1.09<br>E-12 | 1.77<br>E-11 |
| 389538 | MGC7208 0 | MGC72080 pseudogene                                                          | 8.00  | 9.15  | 1.06 | 3.08<br>E-12 | 4.49<br>E-11 |
| 1185   | CLCN6     | chloride channel 6                                                           | 7.28  | 8.52  | 1.06 | 1.72<br>E-12 | 2.67<br>E-11 |
| 3475   | IFRD1     | interferon-related developmental regulator 1                                 | 8.22  | 9.36  | 1.06 | 2.90<br>E-08 | 1.96<br>E-07 |
| 9903   | KLHL21    | kelch-like 21 (Drosophila)                                                   | 7.62  | 8.80  | 1.06 | 3.32<br>E-12 | 4.81<br>E-11 |
| 1993   | ELAVL2    | ELAV (embryonic lethal, abnormal vision, Drosophila)-like 2 (Hu antigen B)   | 6.79  | 8.18  | 1.05 | 3.00<br>E-11 | 3.54<br>E-10 |
| 2934   | GSN       | gelsolin                                                                     | 8.96  | 10.05 | 1.05 | 3.28<br>E-11 | 3.84<br>E-10 |
| 6249   | CLIP1     | CAP-GLY domain containing linker protein 1                                   | 6.80  | 8.19  | 1.05 | 3.46<br>E-12 | 5.00<br>E-11 |
| 57633  | LRRN1     | leucine rich repeat neuronal 1                                               | 6.89  | 8.24  | 1.05 | 1.94<br>E-11 | 2.37<br>E-10 |
| 6509   | SLC1A4    | solute carrier family 1 (glutamate/neutral amino acid transporter), member 4 | 6.55  | 8.03  | 1.05 | 3.78<br>E-10 | 3.62<br>E-09 |
| 3814   | KISS1     | KiSS-1 metastasis-suppressor                                                 | 6.91  | 8.26  | 1.05 | 8.92<br>E-12 | 1.18<br>E-10 |
| 1134   | CHRNA1    | cholinergic receptor, nicotinic, alpha 1 (muscle)                            | 9.29  | 10.34 | 1.05 | 1.27<br>E-09 | 1.11<br>E-08 |
| 157922 | CAMSAP 1  | calmodulin regulated spectrin-associated protein 1                           | 8.28  | 9.39  | 1.05 | 1.02<br>E-11 | 1.33<br>E-10 |
| 9821   | RB1CC1    | RB1-inducible coiled-coil 1                                                  | 8.79  | 9.86  | 1.05 | 6.33<br>E-12 | 8.63<br>E-11 |
| 10904  | BLCAP     | bladder cancer associated protein                                            | 9.62  | 10.67 | 1.04 | 5.94<br>E-11 | 6.68<br>E-10 |
| 80728  | ARHGAP 39 | Rho GTPase activating protein 39                                             | 7.46  | 8.66  | 1.04 | 1.30<br>E-12 | 2.08<br>E-11 |

|               |                  |                                                                                         |      |       |      |              |              |
|---------------|------------------|-----------------------------------------------------------------------------------------|------|-------|------|--------------|--------------|
| 100132<br>247 | LOC1001<br>32247 | nuclear pore complex<br>interacting protein related<br>gene                             | 8.65 | 9.75  | 1.04 | 2.15<br>E-11 | 2.60<br>E-10 |
| 23564         | DDAH2            | dimethylarginine<br>dimethylaminohydrolase 2                                            | 9.39 | 10.43 | 1.04 | 3.69<br>E-12 | 5.29<br>E-11 |
| 10277         | UBE4B            | ubiquitination factor E4B<br>(UFD2 homolog, yeast)                                      | 8.55 | 9.63  | 1.04 | 1.71<br>E-10 | 1.75<br>E-09 |
| 604           | BCL6             | B-cell CLL/lymphoma 6                                                                   | 8.73 | 9.81  | 1.04 | 4.45<br>E-13 | 7.87<br>E-12 |
| 79085         | SLC25A2<br>3     | solute carrier family 25<br>(mitochondrial carrier;<br>phosphate carrier), member<br>23 | 7.92 | 9.06  | 1.04 | 6.68<br>E-11 | 7.44<br>E-10 |
| 23380         | SRGAP2           | SLIT-ROBO Rho GTPase<br>activating protein 2                                            | 7.04 | 8.32  | 1.04 | 1.20<br>E-11 | 1.54<br>E-10 |
| 2             | A2M              | alpha-2-macroglobulin                                                                   | 6.21 | 7.75  | 1.04 | 6.68<br>E-13 | 1.14<br>E-11 |
| 9284          | NPIP             | nuclear pore complex<br>interacting protein                                             | 8.48 | 9.57  | 1.04 | 2.92<br>E-12 | 4.28<br>E-11 |
| 6235          | RPS29            | ribosomal protein S29                                                                   | 8.48 | 9.57  | 1.04 | 1.35<br>E-09 | 1.17<br>E-08 |
| 815           | CAMK2A           | calcium/calmodulin-<br>dependent protein kinase II<br>alpha                             | 6.38 | 7.88  | 1.04 | 1.13<br>E-11 | 1.45<br>E-10 |
| 5108          | PCM1             | pericentriolar material 1                                                               | 8.93 | 10.00 | 1.04 | 7.77<br>E-12 | 1.04<br>E-10 |
| 7844          | RNF103           | ring finger protein 103                                                                 | 8.75 | 9.83  | 1.03 | 2.10<br>E-10 | 2.10<br>E-09 |
| 337867        | UBAC2            | UBA domain containing 2                                                                 | 8.96 | 10.04 | 1.03 | 9.79<br>E-12 | 1.28<br>E-10 |
| 26053         | AUTS2            | autism susceptibility<br>candidate 2                                                    | 9.08 | 10.14 | 1.03 | 3.31<br>E-12 | 4.80<br>E-11 |
| 11278         | KLF12            | Kruppel-like factor 12                                                                  | 7.81 | 8.96  | 1.03 | 1.20<br>E-10 | 1.27<br>E-09 |
| 11075         | STMN2            | stathmin-like 2                                                                         | 6.49 | 7.96  | 1.03 | 1.50<br>E-11 | 1.89<br>E-10 |
| 253782        | LASS6            | LAG1 homolog, ceramide<br>synthase 6                                                    | 9.53 | 10.56 | 1.03 | 4.63<br>E-09 | 3.62<br>E-08 |
| 8543          | LMO4             | LIM domain only 4                                                                       | 9.16 | 10.21 | 1.03 | 3.21<br>E-08 | 2.16<br>E-07 |
| 23112         | TNRC6B           | trinucleotide repeat<br>containing 6B                                                   | 7.97 | 9.10  | 1.03 | 1.40<br>E-07 | 8.29<br>E-07 |
| 57184         | C15orf17         | chromosome 15 open<br>reading frame 17                                                  | 8.18 | 9.29  | 1.03 | 5.78<br>E-12 | 7.95<br>E-11 |
| 55527         | FEM1A            | fem-1 homolog a (C.<br>elegans)                                                         | 9.37 | 10.40 | 1.03 | 3.00<br>E-12 | 4.40<br>E-11 |
| 376267        | RAB15            | RAB15, member RAS<br>onocogene family                                                   | 7.42 | 8.61  | 1.03 | 7.83<br>E-12 | 1.05<br>E-10 |

|           |          |                                                           |       |       |      |              |              |
|-----------|----------|-----------------------------------------------------------|-------|-------|------|--------------|--------------|
| 127495    | LRRC39   | leucine rich repeat containing 39                         | 6.60  | 8.03  | 1.03 | 1.27<br>E-11 | 1.62<br>E-10 |
| 84617     | TUBB6    | tubulin, beta 6                                           | 11.13 | 12.21 | 1.03 | 3.07<br>E-09 | 2.48<br>E-08 |
| 1108      | CHD4     | chromodomain helicase DNA binding protein 4               | 9.84  | 10.86 | 1.02 | 3.95<br>E-11 | 4.57<br>E-10 |
| 7058      | THBS2    | thrombospondin 2                                          | 7.23  | 8.44  | 1.02 | 2.10<br>E-11 | 2.55<br>E-10 |
| 23644     | EDC4     | enhancer of mRNA decapping 4                              | 9.15  | 10.19 | 1.02 | 1.60<br>E-10 | 1.64<br>E-09 |
| 80205     | CHD9     | chromodomain helicase DNA binding protein 9               | 9.09  | 10.14 | 1.02 | 2.13<br>E-07 | 1.21<br>E-06 |
| 2617      | GARS     | glycyl-tRNA synthetase                                    | 12.16 | 13.24 | 1.02 | 7.14<br>E-09 | 5.40<br>E-08 |
| 353116    | RILPL1   | Rab interacting lysosomal protein-like 1                  | 8.95  | 10.00 | 1.02 | 2.66<br>E-11 | 3.17<br>E-10 |
| 96459     | FNIP1    | folliculin interacting protein 1                          | 8.03  | 9.14  | 1.02 | 8.82<br>E-12 | 1.17<br>E-10 |
| 79924     | ADM2     | adrenomedullin 2                                          | 6.88  | 8.20  | 1.02 | 2.67<br>E-08 | 1.81<br>E-07 |
| 5364      | PLXNB1   | plexin B1                                                 | 6.98  | 8.27  | 1.02 | 6.22<br>E-13 | 1.06<br>E-11 |
| 85457     | KIAA1737 | KIAA1737                                                  | 7.70  | 8.84  | 1.02 | 8.51<br>E-13 | 1.42<br>E-11 |
| 100113407 | TMEM170B | transmembrane protein 170B                                | 6.83  | 8.16  | 1.01 | 1.94<br>E-12 | 2.99<br>E-11 |
| 6938      | TCF12    | transcription factor 12                                   | 8.61  | 9.66  | 1.01 | 1.85<br>E-11 | 2.27<br>E-10 |
| 51118     | UTP11L   | UTP11-like, U3 small nucleolar ribonucleoprotein, (yeast) | 10.50 | 11.50 | 1.01 | 2.73<br>E-12 | 4.03<br>E-11 |
| 91947     | ARRDC4   | arrestin domain containing 4                              | 7.05  | 8.31  | 1.01 | 9.49<br>E-12 | 1.24<br>E-10 |
| 51466     | EVL      | Enah/Vasp-like                                            | 10.56 | 11.57 | 1.01 | 8.88<br>E-12 | 1.17<br>E-10 |
| 84085     | FBXO30   | F-box protein 30                                          | 8.09  | 9.18  | 1.01 | 2.49<br>E-11 | 2.99<br>E-10 |
| 64121     | RRAGC    | Ras-related GTP binding C                                 | 8.78  | 9.82  | 1.01 | 6.26<br>E-11 | 7.01<br>E-10 |
| 5336      | PLCG2    | phospholipase C, gamma 2 (phosphatidylinositol-specific)  | 6.77  | 8.12  | 1.01 | 8.56<br>E-12 | 1.14<br>E-10 |
| 374882    | TMEM205  | transmembrane protein 205                                 | 9.96  | 10.95 | 1.01 | 9.08<br>E-11 | 9.85<br>E-10 |
| 94134     | ARHGAP12 | Rho GTPase activating protein 12                          | 8.42  | 9.48  | 1.01 | 2.66<br>E-11 | 3.16<br>E-10 |
| 4780      | NFE2L2   | nuclear factor (erythroid-derived 2)-like 2               | 9.22  | 10.24 | 1.01 | 4.66         | 4.38         |

|        |           |                                                                           |       |       |       |              |              |
|--------|-----------|---------------------------------------------------------------------------|-------|-------|-------|--------------|--------------|
| 57679  | ALS2      | amyotrophic lateral sclerosis 2 (juvenile)                                | 8.89  | 9.93  | 1.01  | E-10<br>E-12 | E-09<br>E-11 |
| 84033  | OBSCN     | obscurin, cytoskeletal calmodulin and titin-interacting RhoGEF            | 6.45  | 7.89  | 1.01  | 1.79<br>E-11 | 2.20<br>E-10 |
| 51804  | SIX4      | SIX homeobox 4                                                            | 8.74  | 9.78  | 1.01  | 2.31<br>E-12 | 3.47<br>E-11 |
| 476    | ATP1A1    | ATPase, Na <sup>+</sup> /K <sup>+</sup> transporting, alpha 1 polypeptide | 9.46  | 10.47 | 1.00  | 1.12<br>E-11 | 1.44<br>E-10 |
| 63941  | NECAB3    | N-terminal EF-hand calcium binding protein 3                              | 6.96  | 8.24  | 1.00  | 1.52<br>E-10 | 1.57<br>E-09 |
| 6442   | SGCA      | sarcoglycan, alpha (50kDa dystrophin-associated glycoprotein)             | 9.83  | 10.83 | 1.00  | 1.62<br>E-11 | 2.02<br>E-10 |
| 114991 | ZNF618    | zinc finger protein 618                                                   | 7.69  | 8.80  | 1.00  | 1.49<br>E-11 | 1.88<br>E-10 |
| 5613   | PRKX      | protein kinase, X-linked                                                  | 7.54  | 8.55  | 0.88  | 2.81<br>E-11 | 3.33<br>E-10 |
| 613037 | LOC613037 | nuclear pore complex interacting protein pseudogene                       | 8.32  | 9.23  | 0.86  | 1.79<br>E-09 | 1.51<br>E-08 |
| 991    | CDC20     | cell division cycle 20 homolog (S. cerevisiae)                            | 12.45 | 6.62  | -5.31 | 2.59<br>E-27 | 6.23<br>E-24 |
| 3397   | ID1       | inhibitor of DNA binding 1, dominant negative helix-loop-helix protein    | 12.56 | 6.88  | -5.29 | 1.16<br>E-26 | 1.79<br>E-23 |
| 9768   | KIAA0101  | KIAA0101                                                                  | 11.93 | 6.46  | -4.88 | 2.27<br>E-27 | 6.15<br>E-24 |
| 22943  | DKK1      | dickkopf homolog 1 (Xenopus laevis)                                       | 12.67 | 7.73  | -4.75 | 2.01<br>E-25 | 1.74<br>E-22 |
| 4885   | NPTX2     | neuronal pentraxin II                                                     | 13.59 | 8.97  | -4.45 | 6.37<br>E-26 | 6.89<br>E-23 |
| 11065  | UBE2C     | ubiquitin-conjugating enzyme E2C                                          | 11.57 | 6.75  | -4.40 | 2.30<br>E-26 | 3.11<br>E-23 |
| 7153   | TOP2A     | topoisomerase (DNA) II alpha 170kDa                                       | 11.38 | 6.47  | -4.36 | 1.85<br>E-24 | 9.74<br>E-22 |
| 51129  | ANGPTL4   | angiopoietin-like 4                                                       | 11.35 | 6.50  | -4.31 | 1.85<br>E-25 | 1.67<br>E-22 |
| 4071   | TM4SF1    | transmembrane 4 L six family member 1                                     | 11.65 | 7.10  | -4.26 | 3.47<br>E-24 | 1.53<br>E-21 |
| 3887   | KRT81     | keratin 81                                                                | 11.32 | 6.74  | -4.16 | 1.11<br>E-24 | 6.49<br>E-22 |
| 9133   | CCNB2     | cyclin B2                                                                 | 11.17 | 6.62  | -4.07 | 2.34<br>E-24 | 1.18<br>E-21 |

|        |           |                                                                                               |       |       |       |              |              |
|--------|-----------|-----------------------------------------------------------------------------------------------|-------|-------|-------|--------------|--------------|
| 3399   | ID3       | inhibitor of DNA binding 3, dominant negative helix-loop-helix protein                        | 13.13 | 9.04  | -4.02 | 7.62<br>E-24 | 2.94<br>E-21 |
| 5054   | SERPIN E1 | serpin peptidase inhibitor, clade E (nexin, plasminogen activator inhibitor type 1), member 1 | 13.79 | 9.83  | -3.83 | 1.38<br>E-18 | 9.15<br>E-17 |
| 9055   | PRC1      | protein regulator of cytokinesis 1                                                            | 11.33 | 7.29  | -3.82 | 2.26<br>E-24 | 1.17<br>E-21 |
| 4617   | MYF5      | myogenic factor 5                                                                             | 11.98 | 8.08  | -3.79 | 6.22<br>E-23 | 1.67<br>E-20 |
| 4907   | NT5E      | 5'-nucleotidase, ecto (CD73)                                                                  | 11.60 | 7.70  | -3.76 | 2.98<br>E-24 | 1.43<br>E-21 |
| 51203  | NUSAP 1   | nucleolar and spindle associated protein 1                                                    | 10.82 | 6.57  | -3.73 | 6.27<br>E-23 | 1.67<br>E-20 |
| 55165  | CEP55     | centrosomal protein 55kDa                                                                     | 10.82 | 6.70  | -3.66 | 1.30<br>E-24 | 7.39<br>E-22 |
| 4493   | MT1E      | metallothionein 1E                                                                            | 14.17 | 10.37 | -3.66 | 7.34<br>E-20 | 7.34<br>E-18 |
| 26255  | PTTG3P    | pituitary tumor-transforming 3 (pseudogene)                                                   | 11.30 | 7.48  | -3.64 | 5.46<br>E-22 | 1.05<br>E-19 |
| 1164   | CKS2      | CDC28 protein kinase regulatory subunit 2                                                     | 11.74 | 8.00  | -3.63 | 8.21<br>E-24 | 3.01<br>E-21 |
| 55872  | PBK       | PDZ binding kinase                                                                            | 10.53 | 6.31  | -3.62 | 8.18<br>E-24 | 3.01<br>E-21 |
| 5021   | OXTR      | oxytocin receptor                                                                             | 12.11 | 8.52  | -3.52 | 1.07<br>E-22 | 2.56<br>E-20 |
| 1033   | CDKN3     | cyclin-dependent kinase inhibitor 3                                                           | 10.68 | 6.85  | -3.44 | 2.53<br>E-21 | 3.75<br>E-19 |
| 7083   | TK1       | thymidine kinase 1, soluble                                                                   | 10.65 | 6.80  | -3.44 | 9.91<br>E-22 | 1.73<br>E-19 |
| 196792 | FAM24 B   | family with sequence similarity 24, member B                                                  | 11.08 | 7.47  | -3.43 | 5.71<br>E-23 | 1.62<br>E-20 |
| 11010  | GLIPR1    | GLI pathogenesis-related 1                                                                    | 11.31 | 7.77  | -3.42 | 3.81<br>E-20 | 4.18<br>E-18 |
| 332    | BIRC5     | baculoviral IAP repeat containing 5                                                           | 10.60 | 6.77  | -3.41 | 2.96<br>E-23 | 9.13<br>E-21 |
| 8436   | SDPR      | serum deprivation response                                                                    | 11.46 | 8.00  | -3.36 | 4.09<br>E-22 | 8.03<br>E-20 |
| 890    | CCNA2     | cyclin A2                                                                                     | 10.78 | 7.13  | -3.36 | 1.43<br>E-22 | 3.19<br>E-20 |
| 10112  | KIF20A    | kinesin family                                                                                | 10.45 | 6.66  | -3.29 | 4.14         | 8.07         |



|        |         |                                                        |       |      |       |              |              |
|--------|---------|--------------------------------------------------------|-------|------|-------|--------------|--------------|
|        |         | member 20A                                             |       |      |       | E-22         | E-20         |
| 7298   | TYMS    | thymidylate synthetase                                 | 11.44 | 8.07 | -3.28 | 1.07<br>E-20 | 1.34<br>E-18 |
| 9232   | PTTG1   | pituitary tumor-transforming 1                         | 11.37 | 8.03 | -3.25 | 9.06<br>E-23 | 2.33<br>E-20 |
| 4499   | MT1M    | metallothionein 1M                                     | 10.93 | 7.53 | -3.23 | 1.62<br>E-20 | 1.95<br>E-18 |
| 6790   | AURKA   | aurora kinase A                                        | 10.93 | 7.52 | -3.23 | 1.28<br>E-22 | 2.91<br>E-20 |
| 1906   | EDN1    | endothelin 1                                           | 10.32 | 6.61 | -3.20 | 3.50<br>E-23 | 1.05<br>E-20 |
| 64151  | NCAPG   | non-SMC condensin I complex, subunit G                 | 10.16 | 6.37 | -3.20 | 1.56<br>E-21 | 2.47<br>E-19 |
| 3833   | KIFC1   | kinesin family member C1                               | 10.22 | 6.44 | -3.20 | 2.70<br>E-23 | 8.46<br>E-21 |
| 9787   | DLGAP5  | discs, large (Drosophila) homolog-associated protein 5 | 10.27 | 6.54 | -3.19 | 7.50<br>E-22 | 1.39<br>E-19 |
| 5552   | SRGN    | serglycin                                              | 12.48 | 9.26 | -3.19 | 9.24<br>E-19 | 6.44<br>E-17 |
| 113130 | CDCA5   | cell division cycle associated 5                       | 10.51 | 6.96 | -3.19 | 2.32<br>E-22 | 4.86<br>E-20 |
| 4495   | MT1G    | metallothionein 1G                                     | 10.61 | 7.15 | -3.18 | 4.37<br>E-19 | 3.36<br>E-17 |
| 79019  | CENPM   | centromere protein M                                   | 10.20 | 6.45 | -3.16 | 2.02<br>E-22 | 4.32<br>E-20 |
| 9404   | LPXN    | leupaxin                                               | 11.12 | 7.85 | -3.16 | 5.17<br>E-20 | 5.48<br>E-18 |
| 9833   | MELK    | maternal embryonic leucine zipper kinase               | 10.57 | 7.16 | -3.14 | 7.09<br>E-23 | 1.87<br>E-20 |
| 857    | CAV1    | caveolin 1, caveolae protein, 22kDa                    | 12.44 | 9.28 | -3.13 | 2.56<br>E-22 | 5.33<br>E-20 |
| 55355  | HJURP   | Holliday junction recognition protein                  | 10.14 | 6.51 | -3.07 | 1.76<br>E-21 | 2.72<br>E-19 |
| 11013  | TMSB15A | thymosin beta 15a                                      | 10.76 | 7.50 | -3.07 | 8.28<br>E-21 | 1.09<br>E-18 |
| 8318   | CDC45   | cell division cycle 45 homolog (S. cerevisiae)         | 10.07 | 6.43 | -3.06 | 2.36<br>E-21 | 3.54<br>E-19 |
| 9212   | AURKB   | aurora kinase B                                        | 10.03 | 6.40 | -3.05 | 7.45<br>E-22 | 1.39<br>E-19 |
| 9319   | TRIP13  | thyroid hormone receptor interactor 13                 | 10.51 | 7.21 | -3.03 | 2.55<br>E-21 | 3.75<br>E-19 |
| 51659  | GINS2   | GINS complex subunit 2 (Psf2 homolog)                  | 10.78 | 7.60 | -3.02 | 1.22<br>E-22 | 2.88<br>E-20 |

|        |             |                                                                              |       |       |       |              |              |
|--------|-------------|------------------------------------------------------------------------------|-------|-------|-------|--------------|--------------|
| 7424   | VEGFC       | vascular endothelial growth factor C                                         | 10.99 | 7.86  | -3.02 | 8.20<br>E-23 | 2.14<br>E-20 |
| 983    | CDK1        | cyclin-dependent kinase 1                                                    | 10.12 | 6.62  | -2.99 | 6.25<br>E-20 | 6.40<br>E-18 |
| 150468 | CKAP2<br>L  | cytoskeleton associated protein 2-like                                       | 9.91  | 6.32  | -2.99 | 9.17<br>E-23 | 2.33<br>E-20 |
| 23671  | TMEFF<br>2  | transmembrane protein with EGF-like and two follistatin-like domains 2       | 10.59 | 7.41  | -2.98 | 1.07<br>E-21 | 1.84<br>E-19 |
| 54908  | CCDC9<br>9  | coiled-coil domain containing 99                                             | 10.54 | 7.42  | -2.91 | 4.87<br>E-20 | 5.19<br>E-18 |
| 83879  | CDCA7       | cell division cycle associated 7                                             | 10.43 | 7.28  | -2.90 | 6.92<br>E-21 | 9.12<br>E-19 |
| 29127  | RACGA<br>P1 | Rac GTPase activating protein 1                                              | 10.27 | 7.06  | -2.89 | 9.30<br>E-22 | 1.65<br>E-19 |
| 55143  | CDCA8       | cell division cycle associated 8                                             | 10.04 | 6.72  | -2.85 | 5.88<br>E-22 | 1.12<br>E-19 |
| 56944  | OLFML<br>3  | olfactomedin-like 3                                                          | 11.54 | 8.67  | -2.85 | 1.08<br>E-18 | 7.46<br>E-17 |
| 72     | ACTG2       | actin, gamma 2, smooth muscle, enteric                                       | 10.03 | 6.73  | -2.85 | 5.81<br>E-20 | 6.00<br>E-18 |
| 5167   | ENPP1       | ectonucleotide pyrophosphatase/phosphodiesterase 1                           | 10.09 | 6.84  | -2.84 | 2.44<br>E-21 | 3.64<br>E-19 |
| 3491   | CYR61       | cysteine-rich, angiogenic inducer, 61                                        | 12.47 | 9.62  | -2.84 | 1.99<br>E-17 | 9.62<br>E-16 |
| 4489   | MT1A        | metallothionein 1A                                                           | 14.39 | 11.47 | -2.82 | 2.98<br>E-18 | 1.80<br>E-16 |
| 54478  | FAM64<br>A  | family with sequence similarity 64, member A                                 | 10.01 | 6.76  | -2.80 | 6.09<br>E-20 | 6.27<br>E-18 |
| 147841 | SPC24       | SPC24, NDC80 kinetochore complex component, homolog ( <i>S. cerevisiae</i> ) | 10.08 | 6.94  | -2.78 | 1.53<br>E-21 | 2.44<br>E-19 |
| 54443  | ANLN        | anillin, actin binding protein                                               | 9.78  | 6.50  | -2.72 | 2.72<br>E-21 | 3.97<br>E-19 |
| 131566 | DCBLD<br>2  | discoidin, CUB and LCCL domain containing 2                                  | 12.09 | 9.39  | -2.69 | 6.58<br>E-19 | 4.81<br>E-17 |
| 4501   | MT1X        | metallothionein 1X                                                           | 12.60 | 9.91  | -2.69 | 1.95<br>E-18 | 1.24<br>E-16 |
| 84913  | ATOH8       | atonal homolog 8                                                             | 9.88  | 6.78  | -2.66 | 8.76         | 1.58         |

|       |           |                                                          |       |       |       |              |              |
|-------|-----------|----------------------------------------------------------|-------|-------|-------|--------------|--------------|
|       |           | (Drosophila)                                             |       |       |       | E-22         | E-19         |
| 23204 | ARL6IP1   | ADP-ribosylation factor-like 6 interacting protein 1     | 12.29 | 9.62  | -2.65 | 1.08<br>E-19 | 1.01<br>E-17 |
| 2171  | FABP5     | fatty acid binding protein 5 (psoriasis-associated)      | 10.45 | 7.65  | -2.63 | 1.35<br>E-19 | 1.24<br>E-17 |
| 397   | ARHGDIB   | Rho GDP dissociation inhibitor (GDI) beta                | 9.70  | 6.53  | -2.63 | 1.52<br>E-21 | 2.44<br>E-19 |
| 22974 | TPX2      | TPX2, microtubule-associated, homolog (Xenopus laevis)   | 9.85  | 6.79  | -2.63 | 1.67<br>E-20 | 1.99<br>E-18 |
| 55723 | ASF1B     | ASF1 anti-silencing function 1 homolog B (S. cerevisiae) | 9.79  | 6.76  | -2.60 | 1.91<br>E-20 | 2.25<br>E-18 |
| 4085  | MAD2L1    | MAD2 mitotic arrest deficient-like 1 (yeast)             | 9.90  | 6.94  | -2.59 | 1.24<br>E-20 | 1.54<br>E-18 |
| 10974 | C10orf116 | chromosome 10 open reading frame 116                     | 10.86 | 8.21  | -2.58 | 1.40<br>E-15 | 4.41<br>E-14 |
| 3159  | HMGA1     | high mobility group AT-hook 1                            | 11.21 | 8.59  | -2.58 | 1.12<br>E-18 | 7.65<br>E-17 |
| 4502  | MT2A      | metallothionein 2A                                       | 14.64 | 12.00 | -2.58 | 1.78<br>E-21 | 2.73<br>E-19 |
| 57552 | NCEH1     | neutral cholesterol ester hydrolase 1                    | 10.31 | 7.55  | -2.57 | 2.89<br>E-21 | 4.19<br>E-19 |
| 5328  | PLAU      | plasminogen activator, urokinase                         | 13.17 | 10.57 | -2.56 | 1.38<br>E-16 | 5.50<br>E-15 |
| 25923 | ATL3      | atlastin GTPase 3                                        | 9.92  | 7.03  | -2.56 | 1.56<br>E-20 | 1.88<br>E-18 |
| 3161  | HMMR      | hyaluronan-mediated motility receptor (RHAMM)            | 9.47  | 6.34  | -2.53 | 1.31<br>E-19 | 1.20<br>E-17 |
| 10234 | LRRC17    | leucine rich repeat containing 17                        | 13.04 | 10.47 | -2.52 | 9.54<br>E-21 | 1.22<br>E-18 |
| 595   | CCND1     | cyclin D1                                                | 13.94 | 11.26 | -2.51 | 2.66<br>E-20 | 3.04<br>E-18 |
| 5999  | RGS4      | regulator of G-protein signaling 4                       | 11.15 | 8.63  | -2.49 | 3.70<br>E-19 | 2.93<br>E-17 |
| 3037  | HAS2      | hyaluronan synthase 2                                    | 9.92  | 7.15  | -2.48 | 3.89<br>E-19 | 3.04<br>E-17 |
| 8515  | ITGA10    | integrin, alpha 10                                       | 9.90  | 7.12  | -2.47 | 7.21<br>E-20 | 7.25<br>E-18 |
| 1163  | CKS1B     | CDC28 protein kinase regulatory subunit 1B               | 11.63 | 9.16  | -2.47 | 7.39<br>E-20 | 7.36<br>E-18 |
| 53827 | FXVD5     | FXVD domain containing ion                               | 11.26 | 8.79  | -2.45 | 1.99<br>E-18 | 1.25<br>E-16 |

|        |              |                                               |       |       |       |              |              |
|--------|--------------|-----------------------------------------------|-------|-------|-------|--------------|--------------|
|        |              | transport regulator 5                         |       |       |       |              |              |
| 5228   | PGF          | placental growth factor                       | 10.83 | 8.32  | -2.45 | 2.44<br>E-19 | 2.05<br>E-17 |
| 3575   | IL7R         | interleukin 7 receptor                        | 9.33  | 6.26  | -2.45 | 1.65<br>E-17 | 8.28<br>E-16 |
| 8407   | TAGLN<br>2   | transgelin 2                                  | 12.29 | 9.83  | -2.45 | 4.03<br>E-20 | 4.36<br>E-18 |
| 1058   | CENPA        | centromere protein A                          | 9.47  | 6.46  | -2.45 | 4.02<br>E-20 | 4.36<br>E-18 |
| 10383  | TUBB2<br>C   | tubulin, beta 2C                              | 12.68 | 10.21 | -2.43 | 5.44<br>E-19 | 4.05<br>E-17 |
| 26271  | FBXO5        | F-box protein 5                               | 10.15 | 7.53  | -2.43 | 6.42<br>E-19 | 4.71<br>E-17 |
| 11004  | KIF2C        | kinesin family member 2C                      | 9.60  | 6.71  | -2.43 | 9.95<br>E-20 | 9.51<br>E-18 |
| 84823  | LMNB2        | lamin B2                                      | 11.21 | 8.77  | -2.41 | 1.20<br>E-19 | 1.11<br>E-17 |
| 84141  | FAM17<br>6A  | family with sequence similarity 176, member A | 10.10 | 7.51  | -2.40 | 1.04<br>E-19 | 9.91<br>E-18 |
| 58504  | ARHGA<br>P22 | Rho GTPase activating protein 22              | 11.14 | 8.72  | -2.40 | 1.71<br>E-18 | 1.10<br>E-16 |
| 81610  | FAM83<br>D   | family with sequence similarity 83, member D  | 9.34  | 6.36  | -2.39 | 2.94<br>E-20 | 3.30<br>E-18 |
| 57559  | STAMB<br>PL1 | STAM binding protein-like 1                   | 10.14 | 7.57  | -2.39 | 2.08<br>E-19 | 1.80<br>E-17 |
| 79974  | C7orf58      | chromosome 7 open reading frame 58            | 10.17 | 7.60  | -2.39 | 4.30<br>E-18 | 2.47<br>E-16 |
| 558    | AXL          | AXL receptor tyrosine kinase                  | 11.11 | 8.71  | -2.39 | 2.51<br>E-18 | 1.54<br>E-16 |
| 83461  | CDCA3        | cell division cycle associated 3              | 9.35  | 6.38  | -2.38 | 5.43<br>E-20 | 5.67<br>E-18 |
| 55859  | BEX1         | brain expressed, X-linked 1                   | 9.60  | 6.80  | -2.38 | 6.95<br>E-20 | 7.05<br>E-18 |
| 5214   | PFKP         | phosphofructokinase, platelet                 | 11.30 | 8.93  | -2.36 | 3.97<br>E-19 | 3.08<br>E-17 |
| 387103 | CENPW        | centromere protein W                          | 10.29 | 7.80  | -2.35 | 3.65<br>E-18 | 2.17<br>E-16 |
| 5420   | PODXL        | podocalyxin-like                              | 11.16 | 8.79  | -2.35 | 7.19<br>E-20 | 7.25<br>E-18 |
| 1017   | CDK2         | cyclin-dependent kinase 2                     | 10.48 | 8.03  | -2.35 | 1.05<br>E-19 | 9.95<br>E-18 |
| 11130  | ZWINT        | ZW10 interactor                               | 9.53  | 6.77  | -2.33 | 2.06<br>E-20 | 2.41<br>E-18 |
| 290    | ANPEP        | alanyl (membrane)                             | 9.89  | 7.32  | -2.32 | 2.96         | 2.45         |

|        |           |                                                                     |       |       |       |              |              |
|--------|-----------|---------------------------------------------------------------------|-------|-------|-------|--------------|--------------|
|        |           | aminopeptidase                                                      |       |       |       | E-19         | E-17         |
| 10460  | TACC3     | transforming, acidic coiled-coil containing protein 3               | 9.37  | 6.50  | -2.32 | 7.26<br>E-19 | 5.25<br>E-17 |
| 699    | BUB1      | budding uninhibited by benzimidazoles 1 homolog (yeast)             | 9.21  | 6.30  | -2.31 | 2.04<br>E-19 | 1.78<br>E-17 |
| 55839  | CENPN     | centromere protein N                                                | 10.06 | 7.56  | -2.31 | 7.67<br>E-19 | 5.53<br>E-17 |
| 3832   | KIF11     | kinesin family member 11                                            | 9.31  | 6.47  | -2.28 | 7.76<br>E-20 | 7.66<br>E-18 |
| 6241   | RRM2      | ribonucleotide reductase M2                                         | 9.23  | 6.37  | -2.28 | 2.22<br>E-20 | 2.59<br>E-18 |
| 7272   | TTK       | TTK protein kinase                                                  | 9.45  | 6.72  | -2.27 | 9.58<br>E-20 | 9.29<br>E-18 |
| 3927   | LASP1     | LIM and SH3 protein 1                                               | 13.23 | 10.89 | -2.27 | 1.53<br>E-17 | 7.75<br>E-16 |
| 81620  | CDT1      | chromatin licensing and DNA replication factor 1                    | 9.23  | 6.38  | -2.26 | 1.83<br>E-19 | 1.62<br>E-17 |
| 10733  | PLK4      | polo-like kinase 4                                                  | 9.35  | 6.55  | -2.26 | 1.32<br>E-18 | 8.82<br>E-17 |
| 1075   | CTSC      | cathepsin C                                                         | 10.06 | 7.64  | -2.25 | 2.68<br>E-19 | 2.24<br>E-17 |
| 50861  | STMN3     | stathmin-like 3                                                     | 10.89 | 8.61  | -2.24 | 3.17<br>E-19 | 2.60<br>E-17 |
| 9582   | APOBE C3B | apolipoprotein B mRNA editing enzyme, catalytic polypeptide-like 3B | 9.17  | 6.34  | -2.24 | 5.43<br>E-20 | 5.67<br>E-18 |
| 302    | ANXA2     | annexin A2                                                          | 10.63 | 8.34  | -2.24 | 7.02<br>E-19 | 5.09<br>E-17 |
| 58538  | MPP4      | membrane protein, palmitoylated 4 (MAGUK p55 subfamily member 4)    | 9.22  | 6.42  | -2.23 | 6.90<br>E-19 | 5.03<br>E-17 |
| 203068 | TUBB      | tubulin, beta                                                       | 13.48 | 11.11 | -2.23 | 4.96<br>E-18 | 2.79<br>E-16 |
| 249    | ALPL      | alkaline phosphatase, liver/bone/kidney                             | 12.91 | 10.62 | -2.22 | 1.12<br>E-15 | 3.64<br>E-14 |
| 2192   | FBLN1     | fibulin 1                                                           | 11.26 | 9.03  | -2.22 | 9.05<br>E-19 | 6.35<br>E-17 |
| 7025   | NR2F1     | nuclear receptor subfamily 2, group F, member 1                     | 9.87  | 7.48  | -2.19 | 2.56<br>E-18 | 1.56<br>E-16 |
| 10487  | CAP1      | CAP, adenylate                                                      | 13.40 | 11.10 | -2.19 | 5.92         | 3.29         |

|        |              |                                                                                |       |      |       |              |              |
|--------|--------------|--------------------------------------------------------------------------------|-------|------|-------|--------------|--------------|
|        |              | cyclase-associated protein 1 (yeast)                                           |       |      |       | E-18         | E-16         |
| 6591   | SNAI2        | snail homolog 2 (Drosophila)                                                   | 11.26 | 9.07 | -2.18 | 4.47<br>E-18 | 2.56<br>E-16 |
| 25886  | POC1A        | POC1 centriolar protein homolog A (Chlamydomonas)                              | 9.99  | 7.64 | -2.18 | 1.38<br>E-19 | 1.26<br>E-17 |
| 55771  | PRR11        | proline rich 11                                                                | 9.17  | 6.42 | -2.18 | 1.17<br>E-17 | 6.16<br>E-16 |
| 960    | CD44         | CD44 molecule (Indian blood group)                                             | 10.36 | 8.10 | -2.18 | 8.62<br>E-19 | 6.11<br>E-17 |
| 4173   | MCM4         | minichromosome maintenance complex component 4                                 | 10.43 | 8.17 | -2.17 | 2.34<br>E-18 | 1.44<br>E-16 |
| 5010   | CLDN1<br>1   | claudin 11                                                                     | 9.71  | 7.30 | -2.17 | 4.50<br>E-17 | 1.97<br>E-15 |
| 57574  | 4-Mar        | membrane-associated ring finger (C3HC4) 4                                      | 9.58  | 7.13 | -2.16 | 1.21<br>E-18 | 8.18<br>E-17 |
| 1295   | COL8A<br>1   | collagen, type VIII, alpha 1                                                   | 11.26 | 9.10 | -2.16 | 9.29<br>E-18 | 4.98<br>E-16 |
| 7035   | TFPI         | tissue factor pathway inhibitor (lipoprotein-associated coagulation inhibitor) | 11.11 | 8.95 | -2.16 | 3.84<br>E-18 | 2.25<br>E-16 |
| 23234  | DNAJC<br>9   | DnaJ (Hsp40) homolog, subfamily C, member 9                                    | 11.46 | 9.31 | -2.16 | 4.76<br>E-18 | 2.69<br>E-16 |
| 259266 | ASPM         | asp (abnormal spindle) homolog, microcephaly associated (Drosophila)           | 9.38  | 6.81 | -2.16 | 6.74<br>E-17 | 2.84<br>E-15 |
| 79783  | C7orf10      | chromosome 7 open reading frame 10                                             | 10.52 | 8.30 | -2.16 | 3.30<br>E-19 | 2.69<br>E-17 |
| 6611   | SMS          | spermine synthase                                                              | 12.01 | 9.85 | -2.15 | 3.34<br>E-19 | 2.70<br>E-17 |
| 899    | CCNF         | cyclin F                                                                       | 9.83  | 7.47 | -2.15 | 3.72<br>E-18 | 2.21<br>E-16 |
| 214    | ALCA<br>M    | activated leukocyte cell adhesion molecule                                     | 10.84 | 8.67 | -2.15 | 1.25<br>E-18 | 8.44<br>E-17 |
| 11339  | OIP5         | Opa interacting protein 5                                                      | 9.23  | 6.57 | -2.14 | 5.05<br>E-18 | 2.83<br>E-16 |
| 8771   | TNFRS<br>F6B | tumor necrosis factor receptor superfamily, member 6b, decoy                   | 9.53  | 7.09 | -2.14 | 6.73<br>E-17 | 2.84<br>E-15 |
| 1535   | CYBA         | cytochrome b-245,                                                              | 9.91  | 7.62 | -2.12 | 9.51         | 3.17         |

|        |              |                                                          |       |       |       |              |              |
|--------|--------------|----------------------------------------------------------|-------|-------|-------|--------------|--------------|
|        |              | alpha polypeptide                                        |       |       |       | E-16         | E-14         |
| 122769 | LRR1         | leucine rich repeat protein 1                            | 9.98  | 7.70  | -2.12 | 1.25<br>E-18 | 8.42<br>E-17 |
| 51200  | CPA4         | carboxypeptidase A4                                      | 9.24  | 6.67  | -2.10 | 1.28<br>E-17 | 6.68<br>E-16 |
| 10051  | SMC4         | structural maintenance of chromosomes 4                  | 10.21 | 8.00  | -2.09 | 5.39<br>E-19 | 4.03<br>E-17 |
| 23576  | DDAH1        | dimethylarginine dimethylaminohydrolase 1                | 10.81 | 8.71  | -2.07 | 2.98<br>E-14 | 7.08<br>E-13 |
| 9590   | AKAP1<br>2   | A kinase (PRKA) anchor protein 12                        | 9.97  | 7.75  | -2.07 | 2.70<br>E-18 | 1.64<br>E-16 |
| 9585   | KIF20B       | kinesin family member 20B                                | 9.59  | 7.28  | -2.06 | 3.77<br>E-18 | 2.22<br>E-16 |
| 57228  | SMAGP        | small cell adhesion glycoprotein                         | 10.20 | 8.01  | -2.06 | 4.27<br>E-18 | 2.46<br>E-16 |
| 10535  | RNASE<br>H2A | ribonuclease H2, subunit A                               | 9.62  | 7.34  | -2.05 | 3.32<br>E-19 | 2.69<br>E-17 |
| 23762  | OSBP2        | oxysterol binding protein 2                              | 9.75  | 7.51  | -2.04 | 1.50<br>E-18 | 9.87<br>E-17 |
| 84058  | WDR54        | WD repeat domain 54                                      | 10.81 | 8.75  | -2.04 | 3.06<br>E-17 | 1.41<br>E-15 |
| 3487   | IGFBP4       | insulin-like growth factor binding protein 4             | 10.50 | 8.40  | -2.04 | 2.57<br>E-17 | 1.22<br>E-15 |
| 63901  | FAM11<br>1A  | family with sequence similarity 111, member A            | 10.09 | 7.96  | -2.02 | 4.50<br>E-18 | 2.57<br>E-16 |
| 3489   | IGFBP6       | insulin-like growth factor binding protein 6             | 10.28 | 8.19  | -2.01 | 8.36<br>E-16 | 2.81<br>E-14 |
| 2791   | GNG11        | guanine nucleotide binding protein (G protein), gamma 11 | 12.00 | 9.98  | -2.01 | 1.17<br>E-17 | 6.16<br>E-16 |
| 25927  | CNRIP1       | cannabinoid receptor interacting protein 1               | 10.56 | 8.51  | -2.01 | 1.83<br>E-18 | 1.16<br>E-16 |
| 5891   | RAGE         | renal tumor antigen                                      | 10.06 | 7.93  | -2.00 | 4.68<br>E-18 | 2.66<br>E-16 |
| 116832 | RPL39L       | ribosomal protein L39-like                               | 9.86  | 7.71  | -1.99 | 7.08<br>E-18 | 3.90<br>E-16 |
| 4176   | MCM7         | minichromosome maintenance complex component 7           | 12.00 | 10.00 | -1.99 | 2.32<br>E-17 | 1.11<br>E-15 |
| 7070   | THY1         | Thy-1 cell surface antigen                               | 11.62 | 9.65  | -1.98 | 1.18<br>E-14 | 3.06<br>E-13 |
| 84650  | EBPL         | emopamil binding                                         | 10.00 | 7.89  | -1.97 | 8.08         | 4.38         |

|       |          |                                                            |       |       |       |              |              |
|-------|----------|------------------------------------------------------------|-------|-------|-------|--------------|--------------|
|       |          | protein-like                                               |       |       |       | E-18         | E-16         |
| 9493  | KIF23    | kinesin family member 23                                   | 9.45  | 7.22  | -1.97 | 7.71<br>E-17 | 3.21<br>E-15 |
| 6675  | UAP1     | UDP-N-acetylglucosamine pyrophosphorylase 1                | 10.21 | 8.14  | -1.97 | 8.51<br>E-14 | 1.82<br>E-12 |
| 23589 | CARHS P1 | calcium regulated heat stable protein 1, 24kDa             | 11.91 | 9.93  | -1.97 | 1.75<br>E-17 | 8.64<br>E-16 |
| 55055 | ZWILC H  | Zwilch, kinetochore associated, homolog (Drosophila)       | 10.32 | 8.30  | -1.96 | 4.00<br>E-18 | 2.34<br>E-16 |
| 23446 | SLC44A 1 | solute carrier family 44, member 1                         | 10.99 | 9.03  | -1.96 | 1.06<br>E-17 | 5.62<br>E-16 |
| 1062  | CENPE    | centromere protein E, 312kDa                               | 9.27  | 6.96  | -1.96 | 7.83<br>E-18 | 4.25<br>E-16 |
| 993   | CDC25 A  | cell division cycle 25 homolog A (S. pombe)                | 8.92  | 6.41  | -1.96 | 3.45<br>E-17 | 1.55<br>E-15 |
| 22936 | ELL2     | elongation factor, RNA polymerase II, 2                    | 9.76  | 7.65  | -1.95 | 1.29<br>E-15 | 4.13<br>E-14 |
| 3885  | KRT34    | keratin 34                                                 | 9.12  | 6.75  | -1.95 | 5.44<br>E-17 | 2.35<br>E-15 |
| 6001  | RGS10    | regulator of G-protein signaling 10                        | 9.83  | 7.76  | -1.93 | 3.51<br>E-17 | 1.56<br>E-15 |
| 8061  | FOSL1    | FOS-like antigen 1                                         | 9.26  | 7.01  | -1.92 | 2.03<br>E-17 | 9.82<br>E-16 |
| 2202  | EFEMP 1  | EGF containing fibulin-like extracellular matrix protein 1 | 11.16 | 9.25  | -1.92 | 5.18<br>E-17 | 2.24<br>E-15 |
| 2274  | FHL2     | four and a half LIM domains 2                              | 12.41 | 10.46 | -1.92 | 2.18<br>E-13 | 4.16<br>E-12 |
| 4172  | MCM3     | minichromosome maintenance complex component 3             | 11.53 | 9.62  | -1.92 | 1.49<br>E-18 | 9.80<br>E-17 |
| 55159 | RFWD3    | ring finger and WD repeat domain 3                         | 9.94  | 7.90  | -1.91 | 8.82<br>E-17 | 3.63<br>E-15 |
| 26147 | PHF19    | PHD finger protein 19                                      | 9.14  | 6.86  | -1.90 | 7.55<br>E-18 | 4.12<br>E-16 |
| 2189  | FANCG    | Fanconi anemia, complementation group G                    | 9.38  | 7.21  | -1.90 | 3.94<br>E-17 | 1.74<br>E-15 |
| 805   | CALM2    | calmodulin 2 (phosphorylase kinase, delta)                 | 13.79 | 11.76 | -1.90 | 1.03<br>E-15 | 3.39<br>E-14 |
| 9156  | EXO1     | exonuclease 1                                              | 8.89  | 6.46  | -1.89 | 1.66         | 8.32         |



|        |              |                                                                                   |       |       |       |                      |                      |
|--------|--------------|-----------------------------------------------------------------------------------|-------|-------|-------|----------------------|----------------------|
| 11015  | KDELR3       | KDEL (Lys-Asp-Glu-Leu) endoplasmic reticulum protein retention receptor 3         | 10.07 | 8.08  | -1.89 | E-17<br>1.34<br>E-17 | E-16<br>6.96<br>E-16 |
| 81831  | NETO2        | neuropilin (NRP) and tolloid (TLL)-like 2                                         | 9.65  | 7.57  | -1.89 | 6.00<br>E-15         | 1.63<br>E-13         |
| 1111   | CHEK1        | CHK1 checkpoint homolog ( <i>S. pombe</i> )                                       | 8.96  | 6.59  | -1.89 | 1.06<br>E-17         | 5.63<br>E-16         |
| 891    | CCNB1        | cyclin B1                                                                         | 9.03  | 6.70  | -1.88 | 2.84<br>E-16         | 1.05<br>E-14         |
| 8914   | TIMEL<br>ESS | timeless homolog ( <i>Drosophila</i> )                                            | 9.97  | 7.96  | -1.88 | 2.60<br>E-17         | 1.23<br>E-15         |
| 2305   | FOXM1        | forkhead box M1                                                                   | 8.90  | 6.50  | -1.87 | 1.48<br>E-15         | 4.64<br>E-14         |
| 157313 | CDCA2        | cell division cycle associated 2                                                  | 8.82  | 6.39  | -1.87 | 2.00<br>E-18         | 1.26<br>E-16         |
| 6574   | SLC20A1      | solute carrier family 20 (phosphate transporter), member 1                        | 12.62 | 10.73 | -1.87 | 1.45<br>E-15         | 4.54<br>E-14         |
| 6119   | RPA3         | replication protein A3, 14kDa                                                     | 11.19 | 9.33  | -1.87 | 2.68<br>E-17         | 1.26<br>E-15         |
| 4174   | MCM5         | minichromosome maintenance complex component 5                                    | 9.59  | 7.53  | -1.86 | 1.13<br>E-16         | 4.59<br>E-15         |
| 10635  | RAD51<br>AP1 | RAD51 associated protein 1                                                        | 9.14  | 6.93  | -1.86 | 3.46<br>E-17         | 1.55<br>E-15         |
| 130576 | LYPD6<br>B   | LY6/PLAUR domain containing 6B                                                    | 10.37 | 8.46  | -1.86 | 7.50<br>E-16         | 2.56<br>E-14         |
| 197259 | MLKL         | mixed lineage kinase domain-like                                                  | 9.04  | 6.78  | -1.86 | 1.37<br>E-16         | 5.47<br>E-15         |
| 6446   | SGK1         | serum/glucocorticoid regulated kinase 1                                           | 10.24 | 8.32  | -1.86 | 2.50<br>E-13         | 4.68<br>E-12         |
| 2237   | FEN1         | flap structure-specific endonuclease 1                                            | 11.11 | 9.27  | -1.85 | 1.01<br>E-15         | 3.33<br>E-14         |
| 2289   | FKBP5        | FK506 binding protein 5                                                           | 11.04 | 9.20  | -1.85 | 2.94<br>E-17         | 1.37<br>E-15         |
| 3148   | HMGB2        | high-mobility group box 2                                                         | 10.41 | 8.52  | -1.84 | 7.14<br>E-15         | 1.91<br>E-13         |
| 6624   | FSCN1        | fascin homolog 1, actin-bundling protein ( <i>Strongylocentrotus purpuratus</i> ) | 13.14 | 11.22 | -1.84 | 2.40<br>E-16         | 9.07<br>E-15         |
| 1515   | CTSL2        | cathepsin L2                                                                      | 9.23  | 7.09  | -1.84 | 3.60<br>E-18         | 2.15<br>E-16         |
| 4751   | NEK2         | NIMA (never in                                                                    | 8.75  | 6.36  | -1.84 | 1.70                 | 6.57                 |

|       |           |                                                                        |       |       |       |              |              |
|-------|-----------|------------------------------------------------------------------------|-------|-------|-------|--------------|--------------|
|       |           | mitosis gene a)-related kinase 2                                       |       |       |       | E-16         | E-15         |
| 51303 | FKBP11    | FK506 binding protein 11, 19 kDa                                       | 10.01 | 8.06  | -1.83 | 1.42<br>E-16 | 5.63<br>E-15 |
| 55320 | MIS18B P1 | MIS18 binding protein 1                                                | 9.22  | 7.09  | -1.83 | 1.03<br>E-16 | 4.20<br>E-15 |
| 9123  | SLC16A 3  | solute carrier family 16, member 3 (monocarboxylic acid transporter 4) | 12.59 | 10.74 | -1.83 | 1.86<br>E-13 | 3.62<br>E-12 |
| 2201  | FBN2      | fibrillin 2                                                            | 9.93  | 7.98  | -1.83 | 2.24<br>E-13 | 4.26<br>E-12 |
| 83442 | SH3BG RL3 | SH3 domain binding glutamic acid-rich protein like 3                   | 12.03 | 10.20 | -1.83 | 6.07<br>E-17 | 2.59<br>E-15 |
| 8412  | BCAR3     | breast cancer anti-estrogen resistance 3                               | 10.75 | 8.91  | -1.82 | 9.47<br>E-17 | 3.88<br>E-15 |
| 6240  | RRM1      | ribonucleotide reductase M1                                            | 11.82 | 10.00 | -1.82 | 2.28<br>E-17 | 1.09<br>E-15 |
| 7057  | THBS1     | thrombospondin 1                                                       | 12.72 | 10.86 | -1.82 | 5.37<br>E-15 | 1.48<br>E-13 |
| 7106  | TSPAN 4   | tetraspanin 4                                                          | 10.11 | 8.21  | -1.82 | 1.11<br>E-15 | 3.61<br>E-14 |
| 1305  | COL13 A1  | collagen, type XIII, alpha 1                                           | 9.03  | 6.84  | -1.81 | 6.43<br>E-17 | 2.73<br>E-15 |
| 3939  | LDHA      | lactate dehydrogenase A                                                | 14.02 | 12.06 | -1.81 | 1.98<br>E-17 | 9.60<br>E-16 |
| 5427  | POLE2     | polymerase (DNA directed), epsilon 2 (p59 subunit)                     | 9.06  | 6.89  | -1.81 | 7.73<br>E-18 | 4.21<br>E-16 |
| 2297  | FOXD1     | forkhead box D1                                                        | 10.90 | 9.09  | -1.81 | 3.13<br>E-14 | 7.41<br>E-13 |
| 24137 | KIF4A     | kinesin family member 4A                                               | 8.68  | 6.31  | -1.81 | 3.05<br>E-17 | 1.41<br>E-15 |
| 29108 | PYCAR D   | PYD and CARD domain containing                                         | 9.60  | 7.63  | -1.80 | 3.33<br>E-16 | 1.22<br>E-14 |
| 316   | AOX1      | aldehyde oxidase 1                                                     | 8.92  | 6.68  | -1.80 | 7.01<br>E-16 | 2.41<br>E-14 |
| 3838  | KPNA2     | karyopherin alpha 2 (RAG cohort 1, importin alpha 1)                   | 10.03 | 8.14  | -1.79 | 2.13<br>E-16 | 8.13<br>E-15 |
| 3835  | KIF22     | kinesin family member 22                                               | 9.93  | 8.03  | -1.79 | 2.72<br>E-17 | 1.28<br>E-15 |
| 4001  | LMNB1     | lamin B1                                                               | 8.99  | 6.82  | -1.79 | 1.71<br>E-16 | 6.60<br>E-15 |
| 51512 | GTSE1     | G-2 and S-phase                                                        | 8.86  | 6.57  | -1.79 | 1.80         | 8.84         |

|        |           |                                                                                         |       |      |       |              |              |
|--------|-----------|-----------------------------------------------------------------------------------------|-------|------|-------|--------------|--------------|
|        |           | expressed 1                                                                             |       |      |       | E-17         | E-16         |
| 54733  | SLC35F2   | solute carrier family 35, member F2                                                     | 8.97  | 6.78 | -1.79 | 2.97<br>E-17 | 1.38<br>E-15 |
| 1948   | EFNB2     | ephrin-B2                                                                               | 10.25 | 8.41 | -1.79 | 6.51<br>E-17 | 2.76<br>E-15 |
| 2022   | ENG       | endoglin                                                                                | 10.12 | 8.26 | -1.78 | 2.07<br>E-15 | 6.27<br>E-14 |
| 303    | ANXA2P1   | annexin A2 pseudogene 1                                                                 | 9.92  | 8.03 | -1.78 | 4.59<br>E-14 | 1.04<br>E-12 |
| 5880   | RAC2      | ras-related C3 botulinum toxin substrate 2 (rho family, small GTP binding protein Rac2) | 8.74  | 6.43 | -1.77 | 1.71<br>E-17 | 8.53<br>E-16 |
| 55038  | CDCA4     | cell division cycle associated 4                                                        | 9.41  | 7.43 | -1.77 | 4.67<br>E-18 | 2.66<br>E-16 |
| 147372 | CCBE1     | collagen and calcium binding EGF domains 1                                              | 9.21  | 7.16 | -1.77 | 1.86<br>E-16 | 7.12<br>E-15 |
| 6491   | STIL      | SCL/TAL1 interrupting locus                                                             | 8.84  | 6.57 | -1.77 | 9.03<br>E-18 | 4.87<br>E-16 |
| 6839   | SUV39H1   | suppressor of variegation 3-9 homolog 1 (Drosophila)                                    | 9.33  | 7.34 | -1.77 | 9.09<br>E-18 | 4.89<br>E-16 |
| 1063   | CENPF     | centromere protein F, 350/400kDa (mitosin)                                              | 9.04  | 6.92 | -1.77 | 1.31<br>E-13 | 2.65<br>E-12 |
| 148741 | ANKRD35   | ankyrin repeat domain 35                                                                | 9.65  | 7.73 | -1.76 | 1.28<br>E-15 | 4.09<br>E-14 |
| 653888 | LOC653888 | actin-related protein 2/3 complex subunit 1B-like                                       | 9.63  | 7.71 | -1.76 | 3.01<br>E-17 | 1.39<br>E-15 |
| 7052   | TGM2      | transglutaminase 2 (C polypeptide, protein-glutamine-gamma-glutamyltransferase)         | 9.69  | 7.79 | -1.76 | 1.18<br>E-14 | 3.06<br>E-13 |
| 55388  | MCM10     | minichromosome maintenance complex component 10                                         | 8.78  | 6.50 | -1.76 | 2.41<br>E-16 | 9.12<br>E-15 |
| 133    | ADM       | adrenomedullin                                                                          | 11.64 | 9.91 | -1.76 | 2.31<br>E-16 | 8.79<br>E-15 |
| 353142 | LCE3A     | late cornified envelope 3A                                                              | 8.75  | 6.47 | -1.76 | 2.54<br>E-15 | 7.53<br>E-14 |
| 5557   | PRIM1     | primase, DNA, polypeptide 1 (49kDa)                                                     | 9.20  | 7.19 | -1.75 | 2.76<br>E-17 | 1.29<br>E-15 |
| 7171   | TPM4      | tropomyosin 4                                                                           | 11.09 | 9.36 | -1.75 | 9.94         | 2.09         |

|        |              |                                                                        |       |       |       |              |              |
|--------|--------------|------------------------------------------------------------------------|-------|-------|-------|--------------|--------------|
|        |              |                                                                        |       |       |       | E-14         | E-12         |
| 29089  | UBE2T        | ubiquitin-conjugating enzyme E2T (putative)                            | 10.33 | 8.53  | -1.75 | 1.84<br>E-15 | 5.66<br>E-14 |
| 11098  | PRSS23       | protease, serine, 23                                                   | 11.02 | 9.28  | -1.74 | 7.38<br>E-17 | 3.09<br>E-15 |
| 23603  | CORO1<br>C   | coronin, actin binding protein, 1C                                     | 10.57 | 8.80  | -1.74 | 5.54<br>E-16 | 1.94<br>E-14 |
| 7048   | TGFBR<br>2   | transforming growth factor, beta receptor II (70/80kDa)                | 12.40 | 10.62 | -1.74 | 8.14<br>E-16 | 2.75<br>E-14 |
| 25976  | TIPARP       | TCDD-inducible poly(ADP-ribose) polymerase                             | 10.67 | 8.91  | -1.73 | 3.07<br>E-15 | 8.96<br>E-14 |
| 2014   | EMP3         | epithelial membrane protein 3                                          | 13.56 | 11.70 | -1.73 | 2.31<br>E-13 | 4.36<br>E-12 |
| 8710   | SERPIN<br>B7 | serpin peptidase inhibitor, clade B (ovalbumin), member 7              | 8.80  | 6.57  | -1.73 | 4.54<br>E-15 | 1.28<br>E-13 |
| 79622  | SNRNP<br>25  | small nuclear ribonucleoprotein 25kDa (U11/U12)                        | 10.89 | 9.16  | -1.73 | 2.61<br>E-16 | 9.71<br>E-15 |
| 4175   | MCM6         | minichromosome maintenance complex component 6                         | 10.96 | 9.24  | -1.73 | 2.08<br>E-13 | 3.99<br>E-12 |
| 6627   | SNRPA<br>1   | small nuclear ribonucleoprotein polypeptide A'                         | 11.32 | 9.62  | -1.72 | 2.25<br>E-15 | 6.74<br>E-14 |
| 81848  | SPRY4        | sprouty homolog 4 (Drosophila)                                         | 9.59  | 7.72  | -1.72 | 4.68<br>E-17 | 2.05<br>E-15 |
| 64859  | OBFC2<br>A   | oligonucleotide/oligosaccharide-binding fold containing 2A             | 9.93  | 8.12  | -1.71 | 1.60<br>E-17 | 8.06<br>E-16 |
| 143888 | KDEL2        | KDEL (Lys-Asp-Glu-Leu) containing 2                                    | 9.76  | 7.93  | -1.71 | 9.92<br>E-16 | 3.29<br>E-14 |
| 8836   | GGH          | gamma-glutamyl hydrolase (conjugase, folylpolygammaglutamyl hydrolase) | 10.40 | 8.66  | -1.70 | 1.65<br>E-16 | 6.36<br>E-15 |
| 9928   | KIF14        | kinesin family member 14                                               | 8.84  | 6.71  | -1.70 | 2.18<br>E-16 | 8.31<br>E-15 |
| 1192   | CLIC1        | chloride intracellular channel 1                                       | 13.17 | 11.42 | -1.70 | 4.81<br>E-17 | 2.10<br>E-15 |
| 130497 | OSR1         | odd-skipped related 1 (Drosophila)                                     | 9.07  | 7.10  | -1.69 | 1.00<br>E-16 | 4.11<br>E-15 |
| 4860   | PNP          | purine nucleoside                                                      | 8.96  | 6.93  | -1.69 | 1.15         | 3.70         |

|        |               |                                                                           |       |       |       |              |              |
|--------|---------------|---------------------------------------------------------------------------|-------|-------|-------|--------------|--------------|
|        |               | phosphorylase                                                             |       |       |       | E-15         | E-14         |
| 4521   | NUDT1         | nudix (nucleoside diphosphate linked moiety X)-type motif 1               | 10.16 | 8.40  | -1.69 | 1.32<br>E-15 | 4.18<br>E-14 |
| 3065   | HDAC1         | histone deacetylase 1                                                     | 11.40 | 9.72  | -1.69 | 3.39<br>E-17 | 1.53<br>E-15 |
| 10024  | TROAP         | trophinin associated protein (tastin)                                     | 8.77  | 6.62  | -1.68 | 3.17<br>E-17 | 1.44<br>E-15 |
| 220042 | C11orf8<br>2  | chromosome 11 open reading frame 82                                       | 8.99  | 7.00  | -1.68 | 3.17<br>E-17 | 1.44<br>E-15 |
| 8673   | VAMP8         | vesicle-associated membrane protein 8 (endobrevin)                        | 9.96  | 8.19  | -1.68 | 1.90<br>E-13 | 3.68<br>E-12 |
| 7291   | TWIST1        | twist homolog 1 (Drosophila)                                              | 9.71  | 7.91  | -1.67 | 2.24<br>E-13 | 4.26<br>E-12 |
| 388610 | TRNP1         | TMF1-regulated nuclear protein 1                                          | 9.55  | 7.73  | -1.67 | 1.05<br>E-16 | 4.27<br>E-15 |
| 65062  | ALS2C<br>R4   | amyotrophic lateral sclerosis 2 (juvenile) chromosome region, candidate 4 | 10.42 | 8.71  | -1.67 | 4.97<br>E-16 | 1.77<br>E-14 |
| 5111   | PCNA          | proliferating cell nuclear antigen                                        | 10.57 | 8.89  | -1.66 | 1.82<br>E-14 | 4.50<br>E-13 |
| 388121 | TNFAIP<br>8L3 | tumor necrosis factor, alpha-induced protein 8-like 3                     | 9.82  | 8.05  | -1.66 | 1.17<br>E-16 | 4.72<br>E-15 |
| 220134 | SKA1          | spindle and kinetochore associated complex subunit 1                      | 8.63  | 6.43  | -1.66 | 8.78<br>E-16 | 2.95<br>E-14 |
| 1894   | ECT2          | epithelial cell transforming sequence 2 oncogene                          | 9.36  | 7.51  | -1.66 | 7.35<br>E-14 | 1.61<br>E-12 |
| 811    | CALR          | calreticulin                                                              | 11.34 | 9.69  | -1.65 | 2.22<br>E-12 | 3.36<br>E-11 |
| 10403  | NDC80         | NDC80 homolog, kinetochore complex component (S. cerevisiae)              | 8.62  | 6.44  | -1.65 | 2.58<br>E-16 | 9.63<br>E-15 |
| 54892  | NCAPG<br>2    | non-SMC condensin II complex, subunit G2                                  | 9.20  | 7.34  | -1.65 | 5.02<br>E-16 | 1.78<br>E-14 |
| 8683   | SRSF9         | serine/arginine-rich splicing factor 9                                    | 12.34 | 10.68 | -1.64 | 7.90<br>E-17 | 3.27<br>E-15 |
| 8613   | PPAP2B        | phosphatidic acid phosphatase type 2B                                     | 10.10 | 8.41  | -1.63 | 5.88<br>E-16 | 2.04<br>E-14 |
| 123    | PLIN2         | perilipin 2                                                               | 11.39 | 9.77  | -1.62 | 8.58         | 3.54         |

|       |          |                                                                            |       |       |       |              |              |
|-------|----------|----------------------------------------------------------------------------|-------|-------|-------|--------------|--------------|
| 8614  | STC2     | stanniocalcin 2                                                            | 12.43 | 10.80 | -1.61 | 9.60<br>E-11 | E-17<br>E-09 |
| 23729 | SHPK     | sedoheptulokinase                                                          | 9.14  | 7.31  | -1.61 | 4.50<br>E-16 | 1.04<br>E-14 |
| 1465  | CSRP1    | cysteine and glycine-rich protein 1                                        | 11.64 | 10.06 | -1.61 | 1.78<br>E-12 | 2.76<br>E-11 |
| 5050  | PAFAH1B3 | platelet-activating factor acetylhydrolase 1b, catalytic subunit 3 (29kDa) | 10.17 | 8.50  | -1.61 | 1.10<br>E-15 | 3.60<br>E-14 |
| 1847  | DUSP5    | dual specificity phosphatase 5                                             | 10.20 | 8.54  | -1.61 | 5.58<br>E-15 | 1.53<br>E-13 |
| 8364  | HIST1H4C | histone cluster 1, H4c                                                     | 14.40 | 12.72 | -1.60 | 2.11<br>E-14 | 5.14<br>E-13 |
| 10903 | MTMR11   | myotubularin related protein 11                                            | 8.95  | 7.07  | -1.60 | 1.41<br>E-16 | 5.60<br>E-15 |
| 84675 | TRIM55   | tripartite motif containing 55                                             | 10.77 | 9.18  | -1.59 | 1.37<br>E-15 | 4.33<br>E-14 |
| 5984  | RFC4     | replication factor C (activator 1) 4, 37kDa                                | 10.01 | 8.35  | -1.59 | 1.61<br>E-15 | 4.99<br>E-14 |
| 5905  | RANGAP1  | Ran GTPase activating protein 1                                            | 11.28 | 9.70  | -1.59 | 4.60<br>E-14 | 1.04<br>E-12 |
| 3014  | H2AFX    | H2A histone family, member X                                               | 9.19  | 7.41  | -1.58 | 1.69<br>E-15 | 5.21<br>E-14 |
| 54206 | ERF11    | ERBB receptor feedback inhibitor 1                                         | 12.01 | 10.41 | -1.58 | 1.57<br>E-09 | 1.35<br>E-08 |
| 89958 | C9orf140 | chromosome 9 open reading frame 140                                        | 8.64  | 6.60  | -1.57 | 2.17<br>E-14 | 5.26<br>E-13 |
| 51435 | SCARA3   | scavenger receptor class A, member 3                                       | 8.61  | 6.54  | -1.57 | 6.13<br>E-15 | 1.66<br>E-13 |
| 276   | AMY1A    | amylase, alpha 1A (salivary)                                               | 9.35  | 7.62  | -1.57 | 2.81<br>E-15 | 8.25<br>E-14 |
| 9446  | GSTO1    | glutathione S-transferase omega 1                                          | 12.22 | 10.64 | -1.56 | 1.32<br>E-15 | 4.19<br>E-14 |
| 51393 | TRPV2    | transient receptor potential cation channel, subfamily V, member 2         | 9.38  | 7.66  | -1.56 | 1.44<br>E-14 | 3.66<br>E-13 |
| 5393  | EXOSC9   | exosome component 9                                                        | 10.38 | 8.79  | -1.56 | 2.25<br>E-15 | 6.74<br>E-14 |
| 5351  | PLOD1    | procollagen-lysine 1, 2-oxoglutarate 5-dioxygenase 1                       | 12.60 | 11.01 | -1.56 | 5.64<br>E-16 | 1.97<br>E-14 |
| 5902  | RANBP1   | RAN binding protein 1                                                      | 11.03 | 9.50  | -1.55 | 5.96<br>E-15 | 1.63<br>E-13 |

|       |              |                                                                                  |       |       |       |              |              |
|-------|--------------|----------------------------------------------------------------------------------|-------|-------|-------|--------------|--------------|
| 55707 | NECAP<br>2   | NECAP endocytosis<br>associated 2                                                | 9.93  | 8.31  | -1.55 | 2.46<br>E-16 | 9.19<br>E-15 |
| 1490  | CTGF         | connective tissue<br>growth factor                                               | 13.23 | 11.64 | -1.54 | 5.04<br>E-10 | 4.71<br>E-09 |
| 9955  | HS3ST3<br>A1 | heparan sulfate<br>(glucosamine) 3-O-<br>sulfotransferase 3A1                    | 9.78  | 8.14  | -1.54 | 6.75<br>E-16 | 2.33<br>E-14 |
| 71    | ACTG1        | actin, gamma 1                                                                   | 14.20 | 12.54 | -1.54 | 1.23<br>E-12 | 1.98<br>E-11 |
| 64105 | CENPK        | centromere protein K                                                             | 8.67  | 6.72  | -1.54 | 4.85<br>E-15 | 1.36<br>E-13 |
| 64943 | NT5DC<br>2   | 5'-nucleotidase<br>domain containing 2                                           | 9.73  | 8.10  | -1.53 | 3.84<br>E-15 | 1.10<br>E-13 |
| 9918  | NCAPD<br>2   | non-SMC condensin I<br>complex, subunit D2                                       | 10.18 | 8.59  | -1.53 | 9.28<br>E-14 | 1.97<br>E-12 |
| 5725  | PTBP1        | polypyrimidine tract<br>binding protein 1                                        | 13.02 | 11.43 | -1.53 | 1.52<br>E-15 | 4.73<br>E-14 |
| 1174  | AP1S1        | adaptor-related protein<br>complex 1, sigma 1<br>subunit                         | 9.98  | 8.38  | -1.53 | 2.00<br>E-14 | 4.90<br>E-13 |
| 6385  | SDC4         | syndecan 4                                                                       | 9.64  | 8.00  | -1.53 | 7.73<br>E-13 | 1.30<br>E-11 |
| 3329  | HSPD1        | heat shock 60kDa<br>protein 1 (chaperonin)                                       | 12.34 | 10.79 | -1.53 | 6.42<br>E-15 | 1.73<br>E-13 |
| 85012 | TCEAL<br>3   | transcription<br>elongation factor A<br>(SII)-like 3                             | 11.43 | 9.92  | -1.52 | 2.10<br>E-13 | 4.02<br>E-12 |
| 3398  | ID2          | inhibitor of DNA<br>binding 2, dominant<br>negative helix-loop-<br>helix protein | 10.32 | 8.77  | -1.52 | 2.89<br>E-15 | 8.48<br>E-14 |
| 90853 | SPOCD<br>1   | SPOC domain<br>containing 1                                                      | 9.48  | 7.83  | -1.52 | 6.30<br>E-15 | 1.70<br>E-13 |
| 55635 | DEPDC<br>1   | DEP domain<br>containing 1                                                       | 8.62  | 6.67  | -1.52 | 2.16<br>E-14 | 5.25<br>E-13 |
| 11164 | NUDT5        | nudix (nucleoside<br>diphosphate linked<br>moiety X)-type motif<br>5             | 10.86 | 9.37  | -1.51 | 5.14<br>E-16 | 1.82<br>E-14 |
| 5985  | RFC5         | replication factor C<br>(activator 1) 5,<br>36.5kDa                              | 9.48  | 7.84  | -1.51 | 4.17<br>E-15 | 1.18<br>E-13 |
| 5329  | PLAUR        | plasminogen activator,<br>urokinase receptor                                     | 9.46  | 7.82  | -1.50 | 4.23<br>E-15 | 1.20<br>E-13 |
| 8208  | CHAF1<br>B   | chromatin assembly<br>factor 1, subunit B                                        | 8.53  | 6.54  | -1.49 | 3.39<br>E-16 | 1.24<br>E-14 |

| (p60)  |              |                                                        |       |      |       |              |              |
|--------|--------------|--------------------------------------------------------|-------|------|-------|--------------|--------------|
| 51192  | CKLF         | chemokine-like factor                                  | 11.38 | 9.90 | -1.49 | 5.36<br>E-15 | 1.48<br>E-13 |
| 93659  | CGB5         | chorionic gonadotropin, beta polypeptide 5             | 8.47  | 6.48 | -1.49 | 1.30<br>E-14 | 3.31<br>E-13 |
| 26578  | OSTF1        | osteoclast stimulating factor 1                        | 10.05 | 8.51 | -1.49 | 2.42<br>E-16 | 9.12<br>E-15 |
| 114800 | CCDC8<br>5A  | coiled-coil domain containing 85A                      | 8.36  | 6.35 | -1.49 | 1.18<br>E-15 | 3.79<br>E-14 |
| 55732  | C1orf11<br>2 | chromosome 1 open reading frame 112                    | 8.75  | 6.94 | -1.49 | 2.82<br>E-16 | 1.04<br>E-14 |
| 5223   | PGAM1        | phosphoglycerate mutase 1 (brain)                      | 10.54 | 9.04 | -1.49 | 2.85<br>E-13 | 5.28<br>E-12 |
| 619571 | SNORD<br>96A | small nucleolar RNA, C/D box 96A                       | 8.79  | 7.00 | -1.48 | 3.47<br>E-14 | 8.17<br>E-13 |
| 154    | ADRB2        | adrenergic, beta-2-, receptor, surface                 | 9.03  | 7.35 | -1.48 | 6.99<br>E-15 | 1.87<br>E-13 |
| 858    | CAV2         | caveolin 2                                             | 10.96 | 9.50 | -1.48 | 4.39<br>E-15 | 1.24<br>E-13 |
| 55010  | C12orf4<br>8 | chromosome 12 open reading frame 48                    | 8.60  | 6.70 | -1.47 | 1.16<br>E-14 | 3.00<br>E-13 |
| 5352   | PLOD2        | procollagen-lysine, 2-oxoglutarate 5-dioxygenase 2     | 9.36  | 7.74 | -1.47 | 2.46<br>E-12 | 3.67<br>E-11 |
| 2040   | STOM         | stomatin                                               | 10.05 | 8.53 | -1.47 | 5.55<br>E-14 | 1.24<br>E-12 |
| 353376 | TICAM<br>2   | toll-like receptor adaptor molecule 2                  | 9.14  | 7.49 | -1.47 | 4.77<br>E-15 | 1.34<br>E-13 |
| 286527 | TMSB1<br>5B  | thymosin beta 15B                                      | 10.72 | 9.25 | -1.47 | 3.72<br>E-16 | 1.35<br>E-14 |
| 29028  | ATAD2        | ATPase family, AAA domain containing 2                 | 8.60  | 6.71 | -1.47 | 1.67<br>E-14 | 4.19<br>E-13 |
| 88455  | ANKRD<br>13A | ankyrin repeat domain 13A                              | 11.21 | 9.76 | -1.47 | 2.11<br>E-14 | 5.13<br>E-13 |
| 4015   | LOX          | lysyl oxidase                                          | 9.56  | 7.97 | -1.47 | 3.26<br>E-13 | 5.95<br>E-12 |
| 10095  | ARPC1<br>B   | actin related protein 2/3 complex, subunit 1B, 41kDa   | 9.53  | 7.95 | -1.47 | 1.41<br>E-14 | 3.57<br>E-13 |
| 6320   | CLEC11<br>A  | C-type lectin domain family 11, member A               | 9.52  | 7.93 | -1.47 | 2.04<br>E-15 | 6.21<br>E-14 |
| 26872  | STEAP1       | six transmembrane epithelial antigen of the prostate 1 | 8.77  | 7.01 | -1.46 | 2.22<br>E-12 | 3.37<br>E-11 |
| 57415  | C3orf14      | chromosome 3 open                                      | 10.44 | 8.95 | -1.46 | 1.48         | 3.76         |



|        |           |                                                                                   |       |       |       |              |              |
|--------|-----------|-----------------------------------------------------------------------------------|-------|-------|-------|--------------|--------------|
|        |           | reading frame 14                                                                  |       |       |       | E-14         | E-13         |
| 329    | BIRC2     | baculoviral IAP repeat containing 2                                               | 10.80 | 9.35  | -1.46 | 1.11<br>E-13 | 2.28<br>E-12 |
| 51668  | HSPB11    | heat shock protein family B (small), member 11                                    | 10.90 | 9.44  | -1.46 | 1.00<br>E-13 | 2.11<br>E-12 |
| 26002  | MOXD1     | monooxygenase, DBH-like 1                                                         | 8.57  | 6.68  | -1.46 | 2.23<br>E-15 | 6.69<br>E-14 |
| 966    | CD59      | CD59 molecule, complement regulatory protein                                      | 9.82  | 8.31  | -1.45 | 9.55<br>E-15 | 2.51<br>E-13 |
| 10370  | CITED2    | Cbp/p300-interacting transactivator, with Glu/Asp-rich carboxy-terminal domain, 2 | 10.42 | 8.95  | -1.45 | 2.19<br>E-12 | 3.32<br>E-11 |
| 29956  | LASS2     | LAG1 homolog, ceramide synthase 2                                                 | 9.96  | 8.44  | -1.45 | 4.40<br>E-14 | 1.01<br>E-12 |
| 6542   | SLC7A2    | solute carrier family 7 (cationic amino acid transporter, y+ system), member 2    | 8.83  | 7.11  | -1.45 | 5.80<br>E-14 | 1.29<br>E-12 |
| 726    | CAPN5     | calpain 5                                                                         | 9.03  | 7.40  | -1.44 | 2.79<br>E-14 | 6.66<br>E-13 |
| 4982   | TNFRSF11B | tumor necrosis factor receptor superfamily, member 11b                            | 9.33  | 7.73  | -1.44 | 1.82<br>E-13 | 3.56<br>E-12 |
| 56604  | TUBB4Q    | tubulin, beta polypeptide 4, member Q                                             | 9.39  | 7.82  | -1.44 | 1.31<br>E-13 | 2.65<br>E-12 |
| 25941  | C18orf10  | chromosome 18 open reading frame 10                                               | 9.53  | 7.98  | -1.44 | 1.10<br>E-14 | 2.85<br>E-13 |
| 132299 | OCIAD2    | OCIAD domain containing 2                                                         | 8.57  | 6.71  | -1.44 | 1.27<br>E-13 | 2.58<br>E-12 |
| 8829   | NRP1      | neuropilin 1                                                                      | 10.49 | 9.03  | -1.43 | 2.27<br>E-12 | 3.42<br>E-11 |
| 84790  | TUBA1C    | tubulin, alpha 1c                                                                 | 13.93 | 12.37 | -1.43 | 1.40<br>E-14 | 3.55<br>E-13 |
| 29128  | UHRF1     | ubiquitin-like with PHD and ring finger domains 1                                 | 11.36 | 9.95  | -1.43 | 1.78<br>E-14 | 4.42<br>E-13 |
| 6781   | STC1      | stanniocalcin 1                                                                   | 8.78  | 7.06  | -1.43 | 1.69<br>E-15 | 5.21<br>E-14 |
| 2650   | GCNT1     | glucosaminyl (N-acetyl) transferase 1, core 2                                     | 8.82  | 7.13  | -1.43 | 2.78<br>E-14 | 6.65<br>E-13 |
| 1854   | DUT       | deoxyuridine                                                                      | 9.26  | 7.69  | -1.42 | 7.46         | 1.99         |

|        |          |                                                         |       |       |       |              |              |
|--------|----------|---------------------------------------------------------|-------|-------|-------|--------------|--------------|
|        |          | triphosphatase                                          |       |       |       | E-15         | E-13         |
| 2177   | FANCD2   | Fanconi anemia, complementation group D2                | 8.68  | 6.93  | -1.42 | 1.41<br>E-15 | 4.44<br>E-14 |
| 5355   | PLP2     | proteolipid protein 2 (colonic epithelium-enriched)     | 9.30  | 7.72  | -1.42 | 1.20<br>E-14 | 3.09<br>E-13 |
| 134285 | TMEM171  | transmembrane protein 171                               | 8.52  | 6.67  | -1.42 | 2.68<br>E-15 | 7.90<br>E-14 |
| 24147  | FJX1     | four jointed box 1 (Drosophila)                         | 10.01 | 8.53  | -1.42 | 1.74<br>E-14 | 4.33<br>E-13 |
| 9697   | TRAM2    | translocation associated membrane protein 2             | 10.58 | 9.16  | -1.42 | 3.78<br>E-14 | 8.80<br>E-13 |
| 131076 | CCDC58   | coiled-coil domain containing 58                        | 8.65  | 6.91  | -1.42 | 1.22<br>E-14 | 3.14<br>E-13 |
| 995    | CDC25C   | cell division cycle 25 homolog C (S. pombe)             | 8.31  | 6.37  | -1.41 | 8.18<br>E-15 | 2.16<br>E-13 |
| 7431   | VIM      | vimentin                                                | 14.37 | 12.85 | -1.41 | 1.25<br>E-14 | 3.21<br>E-13 |
| 161742 | SPRED1   | sprouty-related, EVH1 domain containing 1               | 10.49 | 9.06  | -1.41 | 9.38<br>E-16 | 3.13<br>E-14 |
| 53340  | SPA17    | sperm autoantigenic protein 17                          | 9.71  | 8.22  | -1.41 | 2.46<br>E-14 | 5.91<br>E-13 |
| 8601   | RGS20    | regulator of G-protein signaling 20                     | 8.51  | 6.68  | -1.40 | 7.17<br>E-15 | 1.92<br>E-13 |
| 7295   | TXN      | thioredoxin                                             | 13.43 | 11.94 | -1.40 | 3.81<br>E-15 | 1.09<br>E-13 |
| 57333  | RCN3     | reticulocalbin 3, EF-hand calcium binding domain        | 10.27 | 8.84  | -1.40 | 2.28<br>E-14 | 5.51<br>E-13 |
| 164284 | APCDD1L  | adenomatosis polyposis coli down-regulated 1-like       | 10.58 | 9.18  | -1.40 | 2.44<br>E-11 | 2.92<br>E-10 |
| 81624  | DIAPH3   | diaphanous homolog 3 (Drosophila)                       | 8.41  | 6.53  | -1.40 | 1.22<br>E-15 | 3.89<br>E-14 |
| 51495  | PTPLA D1 | protein tyrosine phosphatase-like A domain containing 1 | 11.24 | 9.86  | -1.40 | 3.16<br>E-15 | 9.17<br>E-14 |
| 5058   | PAK1     | p21 protein (Cdc42/Rac)-activated kinase 1              | 9.41  | 7.89  | -1.39 | 7.13<br>E-16 | 2.44<br>E-14 |
| 29015  | SLC43A3  | solute carrier family 43, member 3                      | 8.47  | 6.63  | -1.39 | 3.69<br>E-14 | 8.65<br>E-13 |
| 9060   | PAPSS2   | 3'-phosphoadenosine 5'-phosphosulfate                   | 9.08  | 7.52  | -1.39 | 1.93<br>E-14 | 4.74<br>E-13 |

|        |              |                                                  |       |       |       |              |              |
|--------|--------------|--------------------------------------------------|-------|-------|-------|--------------|--------------|
|        |              | synthase 2                                       |       |       |       |              |              |
| 2091   | FBL          | fibrillarlin                                     | 11.11 | 9.75  | -1.38 | 1.05<br>E-12 | 1.71<br>E-11 |
| 6470   | SHMT1        | serine<br>hydroxymethyltransferase 1 (soluble)   | 8.62  | 6.91  | -1.38 | 1.55<br>E-14 | 3.89<br>E-13 |
| 728378 | POTEF        | POTE ankyrin domain family, member F             | 14.17 | 12.68 | -1.38 | 7.56<br>E-15 | 2.01<br>E-13 |
| 78995  | C17orf5<br>3 | chromosome 17 open reading frame 53              | 8.71  | 7.04  | -1.38 | 3.04<br>E-14 | 7.23<br>E-13 |
| 5327   | PLAT         | plasminogen activator, tissue                    | 11.64 | 10.29 | -1.37 | 1.61<br>E-13 | 3.18<br>E-12 |
| 57407  | NMRA<br>L1   | NmrA-like family domain containing 1             | 9.85  | 8.41  | -1.37 | 1.84<br>E-13 | 3.59<br>E-12 |
| 7283   | TUBG1        | tubulin, gamma 1                                 | 11.03 | 9.67  | -1.37 | 1.03<br>E-13 | 2.14<br>E-12 |
| 79001  | VKORC<br>1   | vitamin K epoxide reductase complex, subunit 1   | 12.76 | 11.35 | -1.36 | 7.30<br>E-14 | 1.60<br>E-12 |
| 23594  | ORC6         | origin recognition complex, subunit 6            | 8.47  | 6.68  | -1.36 | 9.45<br>E-15 | 2.48<br>E-13 |
| 144455 | E2F7         | E2F transcription factor 7                       | 8.85  | 7.27  | -1.36 | 1.31<br>E-14 | 3.34<br>E-13 |
| 113174 | SAAL1        | serum amyloid A-like 1                           | 9.47  | 8.00  | -1.36 | 5.42<br>E-15 | 1.50<br>E-13 |
| 874    | CBR3         | carbonyl reductase 3                             | 8.68  | 7.03  | -1.36 | 3.09<br>E-13 | 5.70<br>E-12 |
| 6626   | SNRPA        | small nuclear ribonucleoprotein polypeptide A    | 9.72  | 8.30  | -1.35 | 2.27<br>E-14 | 5.48<br>E-13 |
| 5871   | MAP4K<br>2   | mitogen-activated protein kinase kinase kinase 2 | 9.02  | 7.49  | -1.35 | 2.19<br>E-13 | 4.17<br>E-12 |
| 10376  | TUBA1<br>B   | tubulin, alpha 1b                                | 14.24 | 12.80 | -1.35 | 1.04<br>E-12 | 1.70<br>E-11 |
| 10970  | CKAP4        | cytoskeleton-associated protein 4                | 12.12 | 10.76 | -1.35 | 3.78<br>E-12 | 5.41<br>E-11 |
| 6502   | SKP2         | S-phase kinase-associated protein 2 (p45)        | 10.85 | 9.51  | -1.35 | 2.83<br>E-13 | 5.25<br>E-12 |
| 3486   | IGFBP3       | insulin-like growth factor binding protein 3     | 12.12 | 10.76 | -1.35 | 5.00<br>E-09 | 3.88<br>E-08 |
| 3015   | H2AFZ        | H2A histone family, member Z                     | 13.85 | 12.39 | -1.35 | 6.02<br>E-12 | 8.26<br>E-11 |
| 8438   | RAD54        | RAD54-like (S.                                   | 8.31  | 6.46  | -1.35 | 2.98         | 8.72         |

|        |         |                                                                                                      |       |       |       |              |              |
|--------|---------|------------------------------------------------------------------------------------------------------|-------|-------|-------|--------------|--------------|
|        | L       | cerevisiae)                                                                                          |       |       |       | E-15         | E-14         |
| 1611   | DAP     | death-associated protein                                                                             | 9.64  | 8.21  | -1.34 | 1.59<br>E-14 | 4.00<br>E-13 |
| 9735   | KNTC1   | kinetochore associated 1                                                                             | 8.73  | 7.13  | -1.34 | 5.35<br>E-13 | 9.30<br>E-12 |
| 896    | CCND3   | cyclin D3                                                                                            | 11.56 | 10.24 | -1.34 | 3.76<br>E-14 | 8.78<br>E-13 |
| 7884   | SLBP    | stem-loop binding protein                                                                            | 10.24 | 8.86  | -1.34 | 2.83<br>E-14 | 6.74<br>E-13 |
| 10953  | TOMM34  | translocase of outer mitochondrial membrane 34                                                       | 10.65 | 9.32  | -1.34 | 2.81<br>E-12 | 4.14<br>E-11 |
| 10606  | PAICS   | phosphoribosylaminoimidazole carboxylase, phosphoribosylaminoimidazole succinocarboxamide synthetase | 11.47 | 10.15 | -1.34 | 4.08<br>E-14 | 9.41<br>E-13 |
| 6274   | S100A3  | S100 calcium binding protein A3                                                                      | 8.59  | 6.92  | -1.34 | 1.87<br>E-13 | 3.63<br>E-12 |
| 4833   | NME4    | non-metastatic cells 4, protein expressed in                                                         | 10.95 | 9.63  | -1.34 | 6.63<br>E-13 | 1.13<br>E-11 |
| 284996 | RNF149  | ring finger protein 149                                                                              | 10.79 | 9.46  | -1.33 | 8.40<br>E-15 | 2.22<br>E-13 |
| 9510   | ADAMTS1 | ADAM metalloproteinase with thrombospondin type 1 motif, 1                                           | 9.80  | 8.41  | -1.33 | 1.02<br>E-13 | 2.13<br>E-12 |
| 4016   | LOXL1   | lysyl oxidase-like 1                                                                                 | 9.88  | 8.49  | -1.33 | 2.38<br>E-11 | 2.86<br>E-10 |
| 2303   | FOXC2   | forkhead box C2 (MFH-1, mesenchyme forkhead 1)                                                       | 8.79  | 7.24  | -1.33 | 2.13<br>E-15 | 6.45<br>E-14 |
| 8801   | SUCLG2  | succinate-CoA ligase, GDP-forming, beta subunit                                                      | 10.00 | 8.63  | -1.32 | 3.12<br>E-13 | 5.75<br>E-12 |
| 262    | AMD1    | adenosylmethionine decarboxylase 1                                                                   | 10.23 | 8.87  | -1.32 | 5.46<br>E-15 | 1.50<br>E-13 |
| 6238   | RRBP1   | ribosome binding protein 1 homolog 180kDa (dog)                                                      | 11.70 | 10.39 | -1.32 | 1.46<br>E-13 | 2.92<br>E-12 |
| 54935  | DUSP23  | dual specificity phosphatase 23                                                                      | 10.72 | 9.41  | -1.32 | 5.90<br>E-13 | 1.01<br>E-11 |
| 221150 | SKA3    | spindle and kinetochore associated complex subunit 3                                                 | 8.24  | 6.43  | -1.32 | 1.20<br>E-14 | 3.08<br>E-13 |

|        |            |                                                                    |       |       |       |              |              |
|--------|------------|--------------------------------------------------------------------|-------|-------|-------|--------------|--------------|
| 278    | AMY1C      | amylase, alpha 1C (salivary)                                       | 12.50 | 11.16 | -1.32 | 1.26<br>E-12 | 2.02<br>E-11 |
| 377    | ARF3       | ADP-ribosylation factor 3                                          | 9.43  | 8.01  | -1.32 | 5.13<br>E-15 | 1.43<br>E-13 |
| 10098  | TSPAN 5    | tetraspanin 5                                                      | 10.45 | 9.12  | -1.31 | 1.50<br>E-12 | 2.37<br>E-11 |
| 353139 | LCE2A      | late cornified envelope 2A                                         | 8.28  | 6.48  | -1.31 | 1.05<br>E-14 | 2.75<br>E-13 |
| 3212   | HOXB2      | homeobox B2                                                        | 10.39 | 9.06  | -1.31 | 9.09<br>E-14 | 1.93<br>E-12 |
| 10785  | WDR4       | WD repeat domain 4                                                 | 9.81  | 8.44  | -1.31 | 3.74<br>E-14 | 8.74<br>E-13 |
| 7184   | HSP90B 1   | heat shock protein 90kDa beta (Grp94), member 1                    | 12.97 | 11.60 | -1.31 | 3.39<br>E-12 | 4.91<br>E-11 |
| 9088   | PKMYT 1    | protein kinase, membrane associated tyrosine/threonine 1           | 8.28  | 6.49  | -1.31 | 8.03<br>E-14 | 1.73<br>E-12 |
| 4616   | GADD4 5B   | growth arrest and DNA-damage-inducible, beta                       | 9.75  | 8.39  | -1.30 | 1.36<br>E-13 | 2.75<br>E-12 |
| 23531  | MMD        | monocyte to macrophage differentiation-associated                  | 9.10  | 7.66  | -1.30 | 3.71<br>E-14 | 8.69<br>E-13 |
| 64855  | FAM12 9B   | family with sequence similarity 129, member B                      | 10.84 | 9.55  | -1.30 | 3.22<br>E-12 | 4.68<br>E-11 |
| 728643 | LOC728 643 | heterogeneous nuclear ribonucleoprotein A1 pseudogene              | 10.07 | 8.74  | -1.30 | 1.54<br>E-10 | 1.58<br>E-09 |
| 6628   | SNRPB      | small nuclear ribonucleoprotein polypeptides B and B1              | 12.01 | 10.70 | -1.30 | 5.32<br>E-14 | 1.20<br>E-12 |
| 84844  | PHF5A      | PHD finger protein 5A                                              | 10.61 | 9.31  | -1.29 | 4.24<br>E-14 | 9.73<br>E-13 |
| 4218   | RAB8A      | RAB8A, member RAS oncogene family                                  | 10.88 | 9.59  | -1.29 | 2.08<br>E-14 | 5.09<br>E-13 |
| 60     | ACTB       | actin, beta                                                        | 14.75 | 13.48 | -1.29 | 3.92<br>E-13 | 7.03<br>E-12 |
| 143903 | LAYN       | layilin                                                            | 8.87  | 7.40  | -1.29 | 2.27<br>E-13 | 4.30<br>E-12 |
| 8482   | SEMA7 A    | semaphorin 7A, GPI membrane anchor (John Milton Hagen blood group) | 8.52  | 6.90  | -1.28 | 8.38<br>E-14 | 1.80<br>E-12 |

|        |         |                                                                                         |       |       |       |              |              |
|--------|---------|-----------------------------------------------------------------------------------------|-------|-------|-------|--------------|--------------|
| 2963   | GTF2F2  | general transcription factor IIF, polypeptide 2, 30kDa                                  | 10.99 | 9.73  | -1.28 | 6.88<br>E-14 | 1.51<br>E-12 |
| 205    | AK4     | adenylate kinase 4                                                                      | 8.99  | 7.55  | -1.28 | 8.03<br>E-12 | 1.07<br>E-10 |
| 29109  | FHOD1   | formin homology 2 domain containing 1                                                   | 8.67  | 7.14  | -1.28 | 1.26<br>E-13 | 2.56<br>E-12 |
| 55198  | APPL2   | adaptor protein, phosphotyrosine interaction, PH domain and leucine zipper containing 2 | 9.96  | 8.64  | -1.28 | 1.00<br>E-13 | 2.10<br>E-12 |
| 286016 | TPI1P2  | triosephosphate isomerase 1 pseudogene 2                                                | 10.12 | 8.80  | -1.27 | 8.83<br>E-13 | 1.47<br>E-11 |
| 1843   | DUSP1   | dual specificity phosphatase 1                                                          | 11.12 | 9.87  | -1.27 | 7.76<br>E-14 | 1.68<br>E-12 |
| 83982  | IFI27L2 | interferon, alpha-inducible protein 27-like 2                                           | 10.81 | 9.54  | -1.27 | 2.42<br>E-13 | 4.55<br>E-12 |
| 5935   | RBM3    | RNA binding motif (RNP1, RRM) protein 3                                                 | 10.65 | 9.39  | -1.27 | 5.86<br>E-13 | 1.01<br>E-11 |
| 50615  | IL21R   | interleukin 21 receptor                                                                 | 8.46  | 6.86  | -1.27 | 9.76<br>E-14 | 2.06<br>E-12 |
| 55240  | STEAP3  | STEAP family member 3                                                                   | 9.45  | 8.09  | -1.27 | 8.10<br>E-13 | 1.36<br>E-11 |
| 6275   | S100A4  | S100 calcium binding protein A4                                                         | 14.05 | 12.63 | -1.27 | 3.55<br>E-13 | 6.44<br>E-12 |
| 10721  | POLQ    | polymerase (DNA directed), theta                                                        | 8.37  | 6.70  | -1.26 | 9.28<br>E-12 | 1.22<br>E-10 |
| 7851   | MALL    | mal, T-cell differentiation protein-like                                                | 8.60  | 7.07  | -1.26 | 7.98<br>E-14 | 1.72<br>E-12 |
| 10491  | CRTAP   | cartilage associated protein                                                            | 9.63  | 8.31  | -1.26 | 1.64<br>E-11 | 2.04<br>E-10 |
| 7045   | TGFBI   | transforming growth factor, beta-induced, 68kDa                                         | 14.46 | 13.18 | -1.25 | 3.95<br>E-14 | 9.18<br>E-13 |
| 1479   | CSTF3   | cleavage stimulation factor, 3' pre-RNA, subunit 3, 77kDa                               | 9.98  | 8.69  | -1.25 | 2.77<br>E-13 | 5.15<br>E-12 |
| 151246 | SGOL2   | shugoshin-like 2 (S. pombe)                                                             | 8.54  | 6.99  | -1.25 | 3.91<br>E-13 | 7.03<br>E-12 |
| 3150   | HMGN1   | high-mobility group nucleosome binding                                                  | 11.52 | 10.28 | -1.25 | 9.03<br>E-14 | 1.93<br>E-12 |

|        |           | domain 1                                                                                  |       |       |       |      |      |
|--------|-----------|-------------------------------------------------------------------------------------------|-------|-------|-------|------|------|
| 5547   | PRCP      | prolylcarboxypeptidase (angiotensinase C)                                                 | 10.50 | 9.23  | -1.25 | 6.92 | 1.52 |
|        |           |                                                                                           |       |       |       | E-14 | E-12 |
| 5983   | RFC3      | replication factor C (activator 1) 3, 38kDa                                               | 8.59  | 7.07  | -1.25 | 4.21 | 7.48 |
|        |           |                                                                                           |       |       |       | E-13 | E-12 |
| 56776  | FMN2      | formin 2                                                                                  | 8.31  | 6.64  | -1.24 | 1.14 | 1.84 |
|        |           |                                                                                           |       |       |       | E-12 | E-11 |
| 84321  | THOC3     | THO complex 3                                                                             | 9.22  | 7.85  | -1.24 | 1.20 | 1.92 |
|        |           |                                                                                           |       |       |       | E-12 | E-11 |
| 808    | CALM3     | calmodulin 3 (phosphorylase kinase, delta)                                                | 13.12 | 11.85 | -1.24 | 2.74 | 6.55 |
|        |           |                                                                                           |       |       |       | E-14 | E-13 |
| 2023   | ENO1      | enolase 1, (alpha)                                                                        | 14.38 | 13.11 | -1.24 | 2.38 | 3.56 |
|        |           |                                                                                           |       |       |       | E-12 | E-11 |
| 10019  | SH2B3     | SH2B adaptor protein 3                                                                    | 10.90 | 9.66  | -1.24 | 4.26 | 6.01 |
|        |           |                                                                                           |       |       |       | E-12 | E-11 |
| 28988  | DBNL      | drebrin-like                                                                              | 11.14 | 9.93  | -1.24 | 1.84 | 2.85 |
|        |           |                                                                                           |       |       |       | E-12 | E-11 |
| 3710   | ITPR3     | inositol 1,4,5-triphosphate receptor, type 3                                              | 10.02 | 8.74  | -1.24 | 1.35 | 2.14 |
|        |           |                                                                                           |       |       |       | E-12 | E-11 |
| 4804   | NGFR      | nerve growth factor receptor                                                              | 8.98  | 7.59  | -1.24 | 1.96 | 3.01 |
|        |           |                                                                                           |       |       |       | E-12 | E-11 |
| 11343  | MGLL      | monoglyceride lipase                                                                      | 9.74  | 8.45  | -1.23 | 1.69 | 2.64 |
|        |           |                                                                                           |       |       |       | E-12 | E-11 |
| 8793   | TNFRSF10D | tumor necrosis factor receptor superfamily, member 10d, decoy with truncated death domain | 8.78  | 7.36  | -1.23 | 5.11 | 1.15 |
|        |           |                                                                                           |       |       |       | E-14 | E-12 |
| 51388  | NIP7      | nuclear import 7 homolog (S. cerevisiae)                                                  | 10.39 | 9.14  | -1.23 | 7.66 | 1.66 |
|        |           |                                                                                           |       |       |       | E-14 | E-12 |
| 23165  | NUP205    | nucleoporin 205kDa                                                                        | 9.78  | 8.50  | -1.23 | 1.34 | 2.71 |
|        |           |                                                                                           |       |       |       | E-13 | E-12 |
| 93081  | C13orf27  | chromosome 13 open reading frame 27                                                       | 9.29  | 7.93  | -1.23 | 1.70 | 2.10 |
|        |           |                                                                                           |       |       |       | E-11 | E-10 |
| 79077  | DCTP1     | dCTP pyrophosphatase 1                                                                    | 10.61 | 9.39  | -1.23 | 2.56 | 3.81 |
|        |           |                                                                                           |       |       |       | E-12 | E-11 |
| 440093 | H3F3C     | H3 histone, family 3C                                                                     | 11.27 | 10.07 | -1.23 | 1.92 | 2.96 |
|        |           |                                                                                           |       |       |       | E-12 | E-11 |
| 90411  | MCFD2     | multiple coagulation factor deficiency 2                                                  | 9.83  | 8.55  | -1.23 | 1.85 | 3.61 |
|        |           |                                                                                           |       |       |       | E-13 | E-12 |
| 64399  | HHIP      | hedgehog interacting protein                                                              | 8.28  | 6.61  | -1.23 | 1.03 | 2.13 |
|        |           |                                                                                           |       |       |       | E-13 | E-12 |
| 152189 | CMTM8     | CKLF-like MARVEL                                                                          | 9.09  | 7.72  | -1.23 | 2.18 | 5.28 |

|        |              |                                                                                          |       |       |       |              |              |
|--------|--------------|------------------------------------------------------------------------------------------|-------|-------|-------|--------------|--------------|
|        |              | transmembrane domain containing 8                                                        |       |       |       | E-14         | E-13         |
| 10589  | DRAP1        | DR1-associated protein 1 (negative cofactor 2 alpha)                                     | 11.91 | 10.67 | -1.23 | 1.59<br>E-12 | 2.50<br>E-11 |
| 23623  | RUSC1        | RUN and SH3 domain containing 1                                                          | 10.29 | 9.05  | -1.23 | 3.50<br>E-12 | 5.05<br>E-11 |
| 116028 | C16orf7<br>5 | chromosome 16 open reading frame 75                                                      | 8.47  | 6.94  | -1.23 | 9.04<br>E-14 | 1.93<br>E-12 |
| 92667  | C20orf7<br>2 | chromosome 20 open reading frame 72                                                      | 9.88  | 8.61  | -1.23 | 9.46<br>E-14 | 2.00<br>E-12 |
| 8853   | ASAP2        | ArfGAP with SH3 domain, ankyrin repeat and PH domain 2                                   | 10.46 | 9.22  | -1.23 | 2.46<br>E-12 | 3.67<br>E-11 |
| 54780  | NSMCE<br>4A  | non-SMC element 4 homolog A (S. cerevisiae)                                              | 9.93  | 8.66  | -1.23 | 6.72<br>E-14 | 1.48<br>E-12 |
| 6281   | S100A1<br>0  | S100 calcium binding protein A10                                                         | 13.41 | 12.11 | -1.23 | 5.61<br>E-13 | 9.73<br>E-12 |
| 10952  | SEC61B       | Sec61 beta subunit                                                                       | 12.31 | 11.05 | -1.22 | 1.52<br>E-10 | 1.57<br>E-09 |
| 10312  | TCIRG1       | T-cell, immune regulator 1, ATPase, H <sup>+</sup> transporting, lysosomal V0 subunit A3 | 8.40  | 6.84  | -1.22 | 3.86<br>E-12 | 5.51<br>E-11 |
| 51053  | GMNN         | geminin, DNA replication inhibitor                                                       | 8.67  | 7.23  | -1.22 | 1.00<br>E-12 | 1.65<br>E-11 |
| 305    | ANXA2<br>P3  | annexin A2 pseudogene 3                                                                  | 8.83  | 7.42  | -1.22 | 2.26<br>E-14 | 5.46<br>E-13 |
| 11137  | PWP1         | PWP1 homolog (S. cerevisiae)                                                             | 11.03 | 9.82  | -1.22 | 1.12<br>E-13 | 2.29<br>E-12 |
| 55276  | PGM2         | phosphoglucomutase 2                                                                     | 8.56  | 7.06  | -1.22 | 8.03<br>E-15 | 2.13<br>E-13 |
| 1969   | EPHA2        | EPH receptor A2                                                                          | 8.63  | 7.17  | -1.22 | 2.59<br>E-12 | 3.84<br>E-11 |
| 55215  | FANCI        | Fanconi anemia, complementation group I                                                  | 8.14  | 6.43  | -1.22 | 9.45<br>E-14 | 2.00<br>E-12 |
| 3251   | HPRT1        | hypoxanthine phosphoribosyltransferase 1                                                 | 10.73 | 9.51  | -1.22 | 6.51<br>E-14 | 1.44<br>E-12 |
| 6576   | SLC25A<br>1  | solute carrier family 25 (mitochondrial carrier; citrate                                 | 9.49  | 8.19  | -1.22 | 7.60<br>E-11 | 8.37<br>E-10 |



|        |             |                                                          |       |       |       |              |              |
|--------|-------------|----------------------------------------------------------|-------|-------|-------|--------------|--------------|
|        |             | transporter), member 1                                   |       |       |       |              |              |
| 7167   | TPI1        | triosephosphate isomerase 1                              | 13.58 | 12.26 | -1.22 | 3.89<br>E-12 | 5.55<br>E-11 |
| 65003  | MRPL1<br>1  | mitochondrial ribosomal protein L11                      | 9.94  | 8.68  | -1.22 | 2.15<br>E-12 | 3.28<br>E-11 |
| 4154   | MBNL1       | muscleblind-like (Drosophila)                            | 9.92  | 8.67  | -1.21 | 2.18<br>E-12 | 3.31<br>E-11 |
| 51228  | GLTP        | glycolipid transfer protein                              | 11.88 | 10.66 | -1.21 | 1.57<br>E-13 | 3.11<br>E-12 |
| 27341  | RRP7A       | ribosomal RNA processing 7 homolog A (S. cerevisiae)     | 10.85 | 9.64  | -1.21 | 1.68<br>E-13 | 3.32<br>E-12 |
| 574042 | SNORA<br>10 | small nucleolar RNA, H/ACA box 10                        | 8.70  | 7.29  | -1.21 | 1.44<br>E-12 | 2.28<br>E-11 |
| 5604   | MAP2K<br>1  | mitogen-activated protein kinase kinase 1                | 11.02 | 9.82  | -1.21 | 1.06<br>E-12 | 1.72<br>E-11 |
| 5358   | PLS3        | plastin 3                                                | 9.90  | 8.64  | -1.21 | 2.19<br>E-12 | 3.32<br>E-11 |
| 26035  | GLCE        | glucuronic acid epimerase                                | 9.29  | 7.96  | -1.21 | 8.50<br>E-14 | 1.82<br>E-12 |
| 10552  | ARPC1<br>A  | actin related protein 2/3 complex, subunit 1A, 41kDa     | 11.86 | 10.65 | -1.21 | 7.28<br>E-13 | 1.24<br>E-11 |
| 493    | ATP2B4      | ATPase, Ca <sup>++</sup> transporting, plasma membrane 4 | 8.74  | 7.34  | -1.21 | 1.24<br>E-11 | 1.59<br>E-10 |
| 10276  | NET1        | neuroepithelial cell transforming 1                      | 9.86  | 8.61  | -1.21 | 5.34<br>E-11 | 6.06<br>E-10 |
| 29980  | DONSO<br>N  | downstream neighbor of SON                               | 8.85  | 7.48  | -1.21 | 1.02<br>E-12 | 1.68<br>E-11 |
| 84168  | ANTXR<br>1  | anthrax toxin receptor 1                                 | 9.96  | 8.72  | -1.20 | 1.12<br>E-12 | 1.82<br>E-11 |
| 84057  | MND1        | meiotic nuclear divisions 1 homolog (S. cerevisiae)      | 8.10  | 6.42  | -1.20 | 9.36<br>E-14 | 1.99<br>E-12 |
| 5634   | PRPS2       | phosphoribosyl pyrophosphate synthetase 2                | 8.88  | 7.51  | -1.20 | 1.03<br>E-13 | 2.13<br>E-12 |
| 1002   | CDH4        | cadherin 4, type 1, R-cadherin (retinal)                 | 8.12  | 6.44  | -1.20 | 9.07<br>E-14 | 1.93<br>E-12 |
| 388962 | BOLA3       | bolA homolog 3 (E. coli)                                 | 11.18 | 10.00 | -1.20 | 1.17<br>E-12 | 1.89<br>E-11 |
| 10092  | ARPC5       | actin related protein 2/3 complex, subunit 5, 16kDa      | 11.82 | 10.61 | -1.20 | 3.64<br>E-11 | 4.23<br>E-10 |
| 30851  | TAX1B       | Tax1 (human T-cell                                       | 11.93 | 10.71 | -1.20 | 1.54         | 3.88         |

|        |              |                                                                                                     |       |       |       |              |              |
|--------|--------------|-----------------------------------------------------------------------------------------------------|-------|-------|-------|--------------|--------------|
|        | P3           | leukemia virus type I)<br>binding protein 3                                                         |       |       |       | E-14         | E-13         |
| 9397   | NMT2         | N-myristoyltransferase<br>2                                                                         | 9.28  | 7.96  | -1.20 | 1.14<br>E-12 | 1.85<br>E-11 |
| 7360   | UGP2         | UDP-glucose<br>pyrophosphorylase 2                                                                  | 9.31  | 8.00  | -1.20 | 2.93<br>E-12 | 4.29<br>E-11 |
| 4171   | MCM2         | minichromosome<br>maintenance complex<br>component 2                                                | 9.22  | 7.90  | -1.20 | 6.24<br>E-14 | 1.38<br>E-12 |
| 2771   | GNAI2        | guanine nucleotide<br>binding protein (G<br>protein), alpha<br>inhibiting activity<br>polypeptide 2 | 11.48 | 10.29 | -1.20 | 3.35<br>E-13 | 6.10<br>E-12 |
| 56005  | C19orf1<br>0 | chromosome 19 open<br>reading frame 10                                                              | 11.55 | 10.37 | -1.20 | 7.91<br>E-12 | 1.06<br>E-10 |
| 109    | ADCY3        | adenylate cyclase 3                                                                                 | 9.58  | 8.32  | -1.20 | 1.49<br>E-12 | 2.35<br>E-11 |
| 7280   | TUBB2<br>A   | tubulin, beta 2A                                                                                    | 9.99  | 8.75  | -1.19 | 4.49<br>E-14 | 1.02<br>E-12 |
| 79866  | C13orf3<br>4 | chromosome 13 open<br>reading frame 34                                                              | 8.60  | 7.16  | -1.19 | 1.93<br>E-11 | 2.37<br>E-10 |
| 51232  | CRIM1        | cysteine rich<br>transmembrane BMP<br>regulator 1 (chordin-<br>like)                                | 9.35  | 8.06  | -1.19 | 7.68<br>E-11 | 8.44<br>E-10 |
| 8826   | IQGAP1       | IQ motif containing<br>GTPase activating<br>protein 1                                               | 9.11  | 7.80  | -1.19 | 1.80<br>E-11 | 2.21<br>E-10 |
| 79980  | DSN1         | DSN1, MIND<br>kinetochore complex<br>component, homolog<br>( <i>S. cerevisiae</i> )                 | 8.54  | 7.10  | -1.19 | 4.04<br>E-13 | 7.21<br>E-12 |
| 151648 | SGOL1        | shugoshin-like 1 ( <i>S.</i><br><i>pombe</i> )                                                      | 8.15  | 6.50  | -1.18 | 4.06<br>E-14 | 9.39<br>E-13 |
| 3178   | HNRNP<br>A1  | heterogeneous nuclear<br>ribonucleoprotein A1                                                       | 8.68  | 7.29  | -1.18 | 4.20<br>E-13 | 7.47<br>E-12 |
| 5347   | PLK1         | polo-like kinase 1                                                                                  | 8.16  | 6.52  | -1.18 | 4.11<br>E-14 | 9.48<br>E-13 |
| 83463  | MXD3         | MAX dimerization<br>protein 3                                                                       | 8.01  | 6.34  | -1.18 | 1.93<br>E-13 | 3.73<br>E-12 |
| 115106 | HAUS1        | HAUS augmin-like<br>complex, subunit 1                                                              | 9.49  | 8.24  | -1.18 | 2.23<br>E-12 | 3.38<br>E-11 |
| 1211   | CLTA         | clathrin, light chain A                                                                             | 10.86 | 9.69  | -1.18 | 3.51<br>E-13 | 6.38<br>E-12 |
| 29950  | SERTA        | SERTA domain                                                                                        | 10.66 | 9.49  | -1.18 | 4.02         | 7.18         |

|        |         |                                                                                         |       |       |       |              |              |
|--------|---------|-----------------------------------------------------------------------------------------|-------|-------|-------|--------------|--------------|
|        | D1      | containing 1                                                                            |       |       |       | E-13         | E-12         |
| 441531 | PGAM4   | phosphoglycerate mutase family member 4                                                 | 9.84  | 8.62  | -1.18 | 2.88<br>E-12 | 4.23<br>E-11 |
| 7533   | YWHAH   | tyrosine 3-monooxygenase/tryptophan 5-monooxygenase activation protein, eta polypeptide | 12.53 | 11.34 | -1.18 | 5.53<br>E-14 | 1.24<br>E-12 |
| 4201   | MEA1    | male-enhanced antigen 1                                                                 | 9.65  | 8.42  | -1.17 | 9.87<br>E-12 | 1.28<br>E-10 |
| 114908 | TMEM123 | transmembrane protein 123                                                               | 11.11 | 9.97  | -1.17 | 1.81<br>E-13 | 3.55<br>E-12 |
| 10549  | PRDX4   | peroxiredoxin 4                                                                         | 11.71 | 10.55 | -1.17 | 8.94<br>E-12 | 1.18<br>E-10 |
| 824    | CAPN2   | calpain 2, (m/II) large subunit                                                         | 9.05  | 7.75  | -1.17 | 1.68<br>E-13 | 3.32<br>E-12 |
| 56913  | C1GALT1 | core 1 synthase, glycoprotein-N-acetylgalactosamine 3-beta-galactosyltransferase, 1     | 8.96  | 7.67  | -1.17 | 2.65<br>E-12 | 3.92<br>E-11 |
| 10544  | PROCR   | protein C receptor, endothelial                                                         | 8.33  | 6.83  | -1.16 | 1.74<br>E-13 | 3.43<br>E-12 |
| 6434   | TRA2B   | transformer 2 beta homolog (Drosophila)                                                 | 10.58 | 9.42  | -1.16 | 4.36<br>E-10 | 4.12<br>E-09 |
| 1453   | CSNK1D  | casein kinase 1, delta                                                                  | 10.23 | 9.05  | -1.16 | 2.78<br>E-13 | 5.17<br>E-12 |
| 151188 | ARL6IP6 | ADP-ribosylation-like factor 6 interacting protein 6                                    | 9.96  | 8.75  | -1.16 | 1.76<br>E-11 | 2.17<br>E-10 |
| 9948   | WDR1    | WD repeat domain 1                                                                      | 12.88 | 11.68 | -1.16 | 4.02<br>E-13 | 7.19<br>E-12 |
| 391    | RHOG    | ras homolog gene family, member G (rho G)                                               | 10.60 | 9.45  | -1.16 | 1.27<br>E-13 | 2.58<br>E-12 |
| 3776   | KCNK2   | potassium channel, subfamily K, member 2                                                | 8.18  | 6.58  | -1.16 | 2.35<br>E-13 | 4.43<br>E-12 |
| 201254 | STRA13  | stimulated by retinoic acid 13 homolog (mouse)                                          | 10.72 | 9.56  | -1.16 | 3.02<br>E-12 | 4.41<br>E-11 |
| 10536  | LEPREL2 | leprecan-like 2                                                                         | 8.75  | 7.42  | -1.16 | 8.42<br>E-13 | 1.41<br>E-11 |

|        |          |                                                                      |       |       |       |              |              |
|--------|----------|----------------------------------------------------------------------|-------|-------|-------|--------------|--------------|
| 1903   | S1PR3    | sphingosine-1-phosphate receptor 3                                   | 8.39  | 6.93  | -1.16 | 3.77<br>E-13 | 6.80<br>E-12 |
| 10592  | SMC2     | structural maintenance of chromosomes 2                              | 8.55  | 7.15  | -1.16 | 3.18<br>E-13 | 5.84<br>E-12 |
| 56675  | NRIP3    | nuclear receptor interacting protein 3                               | 9.36  | 8.11  | -1.15 | 4.33<br>E-12 | 6.11<br>E-11 |
| 389    | RHOC     | ras homolog gene family, member C                                    | 13.12 | 11.93 | -1.15 | 4.02<br>E-14 | 9.32<br>E-13 |
| 57045  | TWSG1    | twisted gastrulation homolog 1 (Drosophila)                          | 10.65 | 9.50  | -1.15 | 6.39<br>E-12 | 8.71<br>E-11 |
| 10212  | DDX39A   | DEAD (Asp-Glu-Ala-Asp) box polypeptide 39A                           | 11.34 | 10.21 | -1.15 | 1.46<br>E-13 | 2.92<br>E-12 |
| 55967  | NDUFA12  | NADH dehydrogenase (ubiquinone) 1 alpha subcomplex, 12               | 12.36 | 11.17 | -1.15 | 3.28<br>E-13 | 5.99<br>E-12 |
| 152503 | SH3D19   | SH3 domain containing 19                                             | 8.68  | 7.35  | -1.15 | 7.43<br>E-13 | 1.26<br>E-11 |
| 6427   | SRSF2    | serine/arginine-rich splicing factor 2                               | 12.31 | 11.14 | -1.15 | 3.19<br>E-13 | 5.85<br>E-12 |
| 4831   | NME2     | non-metastatic cells 2, protein (NM23B) expressed in                 | 9.30  | 8.06  | -1.15 | 2.45<br>E-13 | 4.61<br>E-12 |
| 114335 | CGB1     | chorionic gonadotropin, beta polypeptide 1                           | 8.29  | 6.79  | -1.15 | 2.90<br>E-13 | 5.36<br>E-12 |
| 1786   | DNMT1    | DNA (cytosine-5-)-methyltransferase 1                                | 11.42 | 10.29 | -1.15 | 9.31<br>E-12 | 1.22<br>E-10 |
| 60559  | SPCS3    | signal peptidase complex subunit 3 homolog (S. cerevisiae)           | 9.01  | 7.73  | -1.14 | 7.05<br>E-11 | 7.82<br>E-10 |
| 5441   | POLR2L   | polymerase (RNA) II (DNA directed) polypeptide L, 7.6kDa             | 9.25  | 8.01  | -1.14 | 1.26<br>E-12 | 2.02<br>E-11 |
| 2542   | SLC37A4  | solute carrier family 37 (glucose-6-phosphate transporter), member 4 | 9.48  | 8.26  | -1.14 | 2.42<br>E-13 | 4.56<br>E-12 |
| 1774   | DNASE1L1 | deoxyribonuclease I-like 1                                           | 9.41  | 8.18  | -1.14 | 2.78<br>E-11 | 3.30<br>E-10 |
| 1434   | CSE1L    | CSE1 chromosome segregation 1-like (yeast)                           | 11.22 | 10.10 | -1.14 | 1.53<br>E-12 | 2.40<br>E-11 |
| 3336   | HSPE1    | heat shock 10kDa                                                     | 11.98 | 10.83 | -1.14 | 2.68         | 3.97         |

|        |               |                                                                             |       |       |       |              |              |
|--------|---------------|-----------------------------------------------------------------------------|-------|-------|-------|--------------|--------------|
|        |               | protein 1 (chaperonin 10)                                                   |       |       |       | E-12         | E-11         |
| 7117   | TMSL3         | thymosin-like 3                                                             | 10.94 | 9.82  | -1.14 | 1.40<br>E-09 | 1.22<br>E-08 |
| 93109  | TMEM4<br>4    | transmembrane protein 44                                                    | 8.91  | 7.63  | -1.14 | 2.04<br>E-13 | 3.93<br>E-12 |
| 378    | ARF4          | ADP-ribosylation factor 4                                                   | 10.91 | 9.78  | -1.14 | 5.11<br>E-11 | 5.82<br>E-10 |
| 6746   | SSR2          | signal sequence receptor, beta (translocon-associated protein beta)         | 11.78 | 10.63 | -1.14 | 2.03<br>E-12 | 3.10<br>E-11 |
| 7443   | VRK1          | vaccinia related kinase 1                                                   | 8.50  | 7.12  | -1.14 | 3.38<br>E-12 | 4.89<br>E-11 |
| 396    | ARHGD<br>IA   | Rho GDP dissociation inhibitor (GDI) alpha                                  | 11.50 | 10.38 | -1.13 | 5.51<br>E-11 | 6.23<br>E-10 |
| 57570  | TRMT5         | TRM5 tRNA methyltransferase 5 homolog ( <i>S. cerevisiae</i> )              | 12.96 | 11.77 | -1.13 | 1.71<br>E-12 | 2.66<br>E-11 |
| 79083  | MLPH          | melanophilin                                                                | 11.15 | 10.05 | -1.13 | 1.90<br>E-11 | 2.33<br>E-10 |
| 729086 | LOC729<br>086 | vesicular, overexpressed in cancer, prosurvival protein 1-like              | 9.03  | 7.78  | -1.13 | 2.51<br>E-10 | 2.48<br>E-09 |
| 5768   | QSOX1         | quiescin Q6 sulfhydryl oxidase 1                                            | 11.04 | 9.94  | -1.13 | 9.24<br>E-08 | 5.66<br>E-07 |
| 5757   | PTMA          | prothymosin, alpha                                                          | 8.62  | 7.29  | -1.13 | 1.62<br>E-07 | 9.46<br>E-07 |
| 835    | CASP2         | caspase 2, apoptosis-related cysteine peptidase                             | 10.50 | 9.37  | -1.13 | 1.56<br>E-12 | 2.46<br>E-11 |
| 79668  | PARP8         | poly (ADP-ribose) polymerase family, member 8                               | 10.21 | 9.06  | -1.12 | 1.18<br>E-10 | 1.25<br>E-09 |
| 83540  | NUF2          | NUF2, NDC80 kinetochore complex component, homolog ( <i>S. cerevisiae</i> ) | 8.00  | 6.41  | -1.12 | 1.77<br>E-13 | 3.48<br>E-12 |
| 140576 | S100A1<br>6   | S100 calcium binding protein A16                                            | 12.06 | 10.93 | -1.12 | 4.21<br>E-12 | 5.96<br>E-11 |
| 27292  | DIMT1<br>L    | DIM1 dimethyladenosine transferase 1-like ( <i>S. cerevisiae</i> )          | 10.69 | 9.58  | -1.12 | 3.28<br>E-13 | 5.99<br>E-12 |

|        |                |                                                                |       |       |       |              |              |
|--------|----------------|----------------------------------------------------------------|-------|-------|-------|--------------|--------------|
| 113457 | TUBA3<br>D     | tubulin, alpha 3d                                              | 8.67  | 7.38  | -1.12 | 3.81<br>E-10 | 3.65<br>E-09 |
| 10465  | PPIH           | peptidylprolyl<br>isomerase H<br>(cyclophilin H)               | 10.01 | 8.85  | -1.12 | 1.20<br>E-10 | 1.27<br>E-09 |
| 8507   | ENC1           | ectodermal-neural<br>cortex 1 (with BTB-<br>like domain)       | 8.86  | 7.61  | -1.12 | 1.18<br>E-12 | 1.89<br>E-11 |
| 55002  | TMCO3          | transmembrane and<br>coiled-coil domains 3                     | 10.13 | 8.99  | -1.11 | 1.95<br>E-12 | 3.00<br>E-11 |
| 91614  | DEPDC<br>7     | DEP domain<br>containing 7                                     | 8.41  | 7.03  | -1.11 | 6.04<br>E-10 | 5.58<br>E-09 |
| 11332  | ACOT7          | acyl-CoA thioesterase<br>7                                     | 11.43 | 10.33 | -1.11 | 1.08<br>E-11 | 1.40<br>E-10 |
| 159    | ADSS           | adenylosuccinate<br>synthase                                   | 9.83  | 8.69  | -1.11 | 5.40<br>E-12 | 7.46<br>E-11 |
| 79850  | FAM57<br>A     | family with sequence<br>similarity 57, member<br>A             | 9.26  | 8.06  | -1.11 | 1.65<br>E-13 | 3.26<br>E-12 |
| 9204   | ZMYM<br>6      | zinc finger, MYM-<br>type 6                                    | 9.72  | 8.57  | -1.10 | 7.25<br>E-12 | 9.80<br>E-11 |
| 9847   | KIAA05<br>28   | KIAA0528                                                       | 9.19  | 7.99  | -1.10 | 2.69<br>E-11 | 3.20<br>E-10 |
| 3619   | INCEN<br>P     | inner centromere<br>protein antigens<br>135/155kDa             | 8.22  | 6.77  | -1.10 | 1.68<br>E-12 | 2.62<br>E-11 |
| 2621   | GAS6           | growth arrest-specific<br>6                                    | 11.49 | 10.40 | -1.10 | 5.98<br>E-13 | 1.03<br>E-11 |
| 664709 | HNRNP<br>A1P10 | heterogeneous nuclear<br>ribonucleoprotein A1<br>pseudogene 10 | 10.12 | 8.99  | -1.10 | 6.66<br>E-11 | 7.42<br>E-10 |
| 1870   | E2F2           | E2F transcription<br>factor 2                                  | 8.20  | 6.74  | -1.10 | 7.36<br>E-13 | 1.25<br>E-11 |
| 5337   | PLD1           | phospholipase D1,<br>phosphatidylcholine-<br>specific          | 8.24  | 6.80  | -1.10 | 3.01<br>E-12 | 4.40<br>E-11 |
| 4942   | OAT            | ornithine<br>aminotransferase                                  | 9.47  | 8.31  | -1.10 | 1.30<br>E-12 | 2.08<br>E-11 |
| 5932   | RBBP8          | retinoblastoma<br>binding protein 8                            | 9.59  | 8.44  | -1.10 | 2.53<br>E-11 | 3.02<br>E-10 |
| 2012   | EMP1           | epithelial membrane<br>protein 1                               | 12.37 | 11.22 | -1.09 | 1.86<br>E-12 | 2.87<br>E-11 |
| 1716   | DGUO<br>K      | deoxyguanosine<br>kinase                                       | 11.62 | 10.55 | -1.09 | 7.78<br>E-12 | 1.04<br>E-10 |
| 64847  | SPATA<br>20    | spermatogenesis<br>associated 20                               | 9.37  | 8.20  | -1.09 | 9.55<br>E-12 | 1.25<br>E-10 |

|        |          |                                                                                          |       |       |       |              |              |
|--------|----------|------------------------------------------------------------------------------------------|-------|-------|-------|--------------|--------------|
| 26499  | PLEK2    | pleckstrin 2                                                                             | 8.14  | 6.64  | -1.09 | 7.09<br>E-12 | 9.60<br>E-11 |
| 54069  | MIS18A   | MIS18 kinetochore protein homolog A (S. pombe)                                           | 9.08  | 7.88  | -1.09 | 2.28<br>E-12 | 3.44<br>E-11 |
| 5732   | PTGER2   | prostaglandin E receptor 2 (subtype EP2), 53kDa                                          | 8.70  | 7.44  | -1.09 | 2.08<br>E-09 | 1.74<br>E-08 |
| 81930  | KIF18A   | kinesin family member 18A                                                                | 7.91  | 6.35  | -1.09 | 3.11<br>E-11 | 3.67<br>E-10 |
| 9637   | FEZ2     | fasciculation and elongation protein zeta 2 (zygin II)                                   | 11.95 | 10.84 | -1.09 | 2.70<br>E-13 | 5.04<br>E-12 |
| 5362   | PLXNA2   | plexin A2                                                                                | 8.35  | 6.97  | -1.09 | 7.36<br>E-10 | 6.70<br>E-09 |
| 91039  | DPP9     | dipeptidyl-peptidase 9                                                                   | 9.46  | 8.31  | -1.09 | 4.63<br>E-12 | 6.52<br>E-11 |
| 5872   | RAB13    | RAB13, member RAS oncogene family                                                        | 9.88  | 8.75  | -1.09 | 1.19<br>E-12 | 1.92<br>E-11 |
| 6428   | SRSF3    | serine/arginine-rich splicing factor 3                                                   | 9.63  | 8.48  | -1.09 | 5.33<br>E-11 | 6.05<br>E-10 |
| 256364 | EML3     | echinoderm microtubule associated protein like 3                                         | 9.36  | 8.20  | -1.09 | 1.53<br>E-11 | 1.93<br>E-10 |
| 64420  | SUSD1    | sushi domain containing 1                                                                | 8.28  | 6.89  | -1.08 | 1.15<br>E-13 | 2.35<br>E-12 |
| 81029  | WNT5B    | wingless-type MMTV integration site family, member 5B                                    | 10.34 | 9.25  | -1.08 | 1.72<br>E-09 | 1.46<br>E-08 |
| 735301 | SNHG9    | small nucleolar RNA host gene 9 (non-protein coding)                                     | 10.51 | 9.42  | -1.08 | 1.95<br>E-10 | 1.96<br>E-09 |
| 64785  | GINS3    | GINS complex subunit 3 (Psf3 homolog)                                                    | 8.89  | 7.68  | -1.08 | 6.99<br>E-12 | 9.47<br>E-11 |
| 6432   | SRSF7    | serine/arginine-rich splicing factor 7                                                   | 9.64  | 8.50  | -1.08 | 3.85<br>E-12 | 5.51<br>E-11 |
| 7534   | YWHAZ    | tyrosine 3-monooxygenase/tryptophan 5-monooxygenase activation protein, zeta polypeptide | 12.82 | 11.70 | -1.08 | 5.25<br>E-11 | 5.96<br>E-10 |
| 203427 | SLC25A43 | solute carrier family 25, member 43                                                      | 9.04  | 7.85  | -1.08 | 6.88<br>E-11 | 7.65<br>E-10 |
| 200150 | PLD5     | phospholipase D family, member 5                                                         | 8.35  | 7.00  | -1.08 | 9.56<br>E-13 | 1.58<br>E-11 |

|               |                  |                                                              |       |       |       |              |              |
|---------------|------------------|--------------------------------------------------------------|-------|-------|-------|--------------|--------------|
| 81691         | LOC816<br>91     | exonuclease NEF-sp                                           | 8.19  | 6.75  | -1.08 | 6.24<br>E-12 | 8.52<br>E-11 |
| 100216<br>001 | LOC100<br>216001 | hypothetical<br>LOC100216001                                 | 8.10  | 6.62  | -1.08 | 2.10<br>E-13 | 4.02<br>E-12 |
| 93323         | HAUS8            | HAUS augmin-like<br>complex, subunit 8                       | 8.32  | 6.96  | -1.07 | 6.26<br>E-13 | 1.07<br>E-11 |
| 1000          | CDH2             | cadherin 2, type 1, N-<br>cadherin (neuronal)                | 12.27 | 11.17 | -1.07 | 1.16<br>E-06 | 5.78<br>E-06 |
| 80178         | C16orf5<br>9     | chromosome 16 open<br>reading frame 59                       | 8.45  | 7.14  | -1.07 | 1.56<br>E-12 | 2.46<br>E-11 |
| 30844         | EHD4             | EH-domain containing<br>4                                    | 9.86  | 8.75  | -1.07 | 1.39<br>E-12 | 2.20<br>E-11 |
| 9274          | BCL7C            | B-cell CLL/lymphoma<br>7C                                    | 9.96  | 8.84  | -1.07 | 5.08<br>E-12 | 7.06<br>E-11 |
| 201161        | CENPV            | centromere protein V                                         | 10.11 | 9.02  | -1.07 | 2.13<br>E-11 | 2.58<br>E-10 |
| 5538          | PPT1             | palmitoyl-protein<br>thioesterase 1                          | 10.13 | 9.04  | -1.07 | 6.58<br>E-11 | 7.34<br>E-10 |
| 8660          | IRS2             | insulin receptor<br>substrate 2                              | 10.08 | 8.99  | -1.07 | 3.62<br>E-12 | 5.21<br>E-11 |
| 3725          | JUN              | jun proto-oncogene                                           | 10.51 | 9.44  | -1.07 | 4.72<br>E-12 | 6.63<br>E-11 |
| 5734          | PTGER<br>4       | prostaglandin E<br>receptor 4 (subtype<br>EP4)               | 9.29  | 8.14  | -1.07 | 2.08<br>E-12 | 3.18<br>E-11 |
| 677838        | SNORA<br>61      | small nucleolar RNA,<br>H/ACA box 61                         | 8.83  | 7.62  | -1.07 | 2.25<br>E-10 | 2.24<br>E-09 |
| 650157        | LOC650<br>157    | peptidyl-prolyl cis-<br>trans isomerase A-like               | 10.88 | 9.83  | -1.07 | 1.87<br>E-12 | 2.88<br>E-11 |
| 121457        | IKBIP            | IKBKB interacting<br>protein                                 | 8.73  | 7.51  | -1.07 | 6.39<br>E-12 | 8.71<br>E-11 |
| 8301          | PICAL<br>M       | phosphatidylinositol<br>binding clathrin<br>assembly protein | 11.09 | 10.05 | -1.07 | 5.83<br>E-13 | 1.00<br>E-11 |
| 10613         | ERLIN1           | ER lipid raft<br>associated 1                                | 8.56  | 7.30  | -1.07 | 1.09<br>E-12 | 1.77<br>E-11 |
| 7205          | TRIP6            | thyroid hormone<br>receptor interactor 6                     | 11.23 | 10.18 | -1.07 | 2.09<br>E-12 | 3.19<br>E-11 |
| 728026        | LOC728<br>026    | hypothetical protein<br>LOC728026                            | 8.53  | 7.26  | -1.06 | 4.95<br>E-08 | 3.21<br>E-07 |
| 29097         | CNIH4            | cornichon homolog 4<br>(Drosophila)                          | 10.99 | 9.95  | -1.06 | 6.12<br>E-10 | 5.64<br>E-09 |
| 51318         | MRPL3<br>5       | mitochondrial<br>ribosomal protein L35                       | 10.20 | 9.11  | -1.06 | 3.52<br>E-12 | 5.07<br>E-11 |
| 7867          | MAPK<br>APK3     | mitogen-activated<br>protein kinase-                         | 10.89 | 9.84  | -1.06 | 1.08<br>E-11 | 1.40<br>E-10 |



|        |              |                                                                          |       |      |       |              |              |
|--------|--------------|--------------------------------------------------------------------------|-------|------|-------|--------------|--------------|
|        |              | activated protein kinase 3                                               |       |      |       |              |              |
| 5230   | PGK1         | phosphoglycerate kinase 1                                                | 10.56 | 9.50 | -1.06 | 1.63<br>E-11 | 2.04<br>E-10 |
| 3892   | KRT86        | keratin 86                                                               | 8.07  | 6.59 | -1.06 | 1.82<br>E-12 | 2.82<br>E-11 |
| 7381   | UQCRB        | ubiquinol-cytochrome c reductase binding protein                         | 9.63  | 8.51 | -1.06 | 5.01<br>E-12 | 6.97<br>E-11 |
| 4277   | MICB         | MHC class I polypeptide-related sequence B                               | 8.32  | 6.99 | -1.06 | 1.01<br>E-12 | 1.66<br>E-11 |
| 771    | CA12         | carbonic anhydrase XII                                                   | 8.49  | 7.22 | -1.06 | 9.65<br>E-13 | 1.60<br>E-11 |
| 54918  | CMTM6        | CKLF-like MARVEL transmembrane domain containing 6                       | 9.87  | 8.77 | -1.05 | 4.24<br>E-12 | 5.99<br>E-11 |
| 83596  | BCL2L1<br>2  | BCL2-like 12 (proline rich)                                              | 10.10 | 9.02 | -1.05 | 4.47<br>E-12 | 6.29<br>E-11 |
| 4603   | MYBL1        | v-myb myeloblastosis viral oncogene homolog (avian)-like 1               | 7.98  | 6.47 | -1.05 | 2.01<br>E-12 | 3.08<br>E-11 |
| 51514  | DTL          | denticleless homolog (Drosophila)                                        | 7.94  | 6.43 | -1.05 | 2.54<br>E-12 | 3.78<br>E-11 |
| 80071  | CCDC1<br>5   | coiled-coil domain containing 15                                         | 8.46  | 7.20 | -1.05 | 1.27<br>E-12 | 2.04<br>E-11 |
| 2118   | ETV4         | ets variant 4                                                            | 8.52  | 7.27 | -1.05 | 4.47<br>E-11 | 5.14<br>E-10 |
| 51278  | IERS5        | immediate early response 5                                               | 9.82  | 8.74 | -1.05 | 1.02<br>E-12 | 1.67<br>E-11 |
| 91289  | LMF2         | lipase maturation factor 2                                               | 9.11  | 7.96 | -1.05 | 1.06<br>E-12 | 1.72<br>E-11 |
| 115908 | CTHRC<br>1   | collagen triple helix repeat containing 1                                | 10.52 | 9.47 | -1.05 | 6.14<br>E-12 | 8.41<br>E-11 |
| 91057  | CCDC3<br>4   | coiled-coil domain containing 34                                         | 8.80  | 7.61 | -1.05 | 2.45<br>E-12 | 3.67<br>E-11 |
| 7538   | ZFP36        | zinc finger protein 36, C3H type, homolog (mouse)                        | 9.27  | 8.14 | -1.05 | 6.64<br>E-12 | 9.03<br>E-11 |
| 8818   | DPM2         | dolichyl-phosphate mannosyltransferase polypeptide 2, regulatory subunit | 8.85  | 7.67 | -1.05 | 4.07<br>E-12 | 5.78<br>E-11 |
| 728255 | KRTAP<br>1-4 | keratin associated protein 1-4                                           | 7.91  | 6.41 | -1.04 | 1.05<br>E-12 | 1.71<br>E-11 |
| 7041   | TGFB1I       | transforming growth                                                      | 10.35 | 9.31 | -1.04 | 1.39         | 1.76         |

|        |              |                                                                                |       |      |       |              |              |
|--------|--------------|--------------------------------------------------------------------------------|-------|------|-------|--------------|--------------|
|        | 1            | factor beta 1 induced transcript 1                                             |       |      |       | E-11         | E-10         |
| 2717   | GLA          | galactosidase, alpha                                                           | 9.76  | 8.68 | -1.04 | 3.22<br>E-13 | 5.90<br>E-12 |
| 5580   | PRKCD        | protein kinase C, delta                                                        | 9.34  | 8.22 | -1.04 | 1.65<br>E-12 | 2.59<br>E-11 |
| 51099  | ABHD5        | abhydrolase domain containing 5                                                | 8.88  | 7.72 | -1.04 | 4.96<br>E-12 | 6.92<br>E-11 |
| 51490  | C9orf11<br>4 | chromosome 9 open reading frame 114                                            | 9.13  | 7.99 | -1.04 | 2.36<br>E-12 | 3.54<br>E-11 |
| 64834  | ELOVL<br>1   | elongation of very long chain fatty acids (FEN1/Elo2, SUR4/Elo3, yeast)-like 1 | 9.29  | 8.17 | -1.04 | 9.98<br>E-13 | 1.65<br>E-11 |
| 23421  | ITGB3B<br>P  | integrin beta 3 binding protein (beta3-endonexin)                              | 8.03  | 6.57 | -1.04 | 1.52<br>E-11 | 1.91<br>E-10 |
| 1503   | CTPS         | CTP synthase                                                                   | 9.85  | 8.77 | -1.04 | 1.52<br>E-09 | 1.30<br>E-08 |
| 83895  | KRTAP<br>1-5 | keratin associated protein 1-5                                                 | 8.13  | 6.74 | -1.04 | 7.00<br>E-11 | 7.77<br>E-10 |
| 440145 | MZT1         | mitotic spindle organizing protein 1                                           | 9.36  | 8.26 | -1.03 | 1.17<br>E-12 | 1.88<br>E-11 |
| 4580   | MTX1         | metaxin 1                                                                      | 8.83  | 7.66 | -1.03 | 3.67<br>E-12 | 5.27<br>E-11 |
| 26289  | AK5          | adenylate kinase 5                                                             | 9.39  | 8.30 | -1.03 | 1.95<br>E-11 | 2.38<br>E-10 |
| 2146   | EZH2         | enhancer of zeste homolog 2 (Drosophila)                                       | 8.54  | 7.32 | -1.03 | 2.36<br>E-12 | 3.54<br>E-11 |
| 1318   | SLC31A<br>2  | solute carrier family 31 (copper transporters), member 2                       | 9.63  | 8.55 | -1.03 | 1.57<br>E-11 | 1.97<br>E-10 |
| 8624   | PSMG1        | proteasome (prosome, macropain) assembly chaperone 1                           | 10.27 | 9.24 | -1.02 | 1.05<br>E-12 | 1.71<br>E-11 |
| 54793  | KCTD9        | potassium channel tetramerisation domain containing 9                          | 8.66  | 7.49 | -1.02 | 1.44<br>E-11 | 1.81<br>E-10 |
| 51010  | EXOSC<br>3   | exosome component 3                                                            | 9.68  | 8.61 | -1.02 | 2.87<br>E-12 | 4.22<br>E-11 |
| 9117   | SEC22C       | SEC22 vesicle trafficking protein homolog C (S.                                | 9.79  | 8.73 | -1.02 | 1.10<br>E-12 | 1.78<br>E-11 |

| cerevisiae) |           |                                                                                    |       |       |       |              |              |
|-------------|-----------|------------------------------------------------------------------------------------|-------|-------|-------|--------------|--------------|
| 54587       | MXRA8     | matrix-remodelling associated 8                                                    | 8.72  | 7.55  | -1.02 | 7.67<br>E-12 | 1.03<br>E-10 |
| 644936      | LOC644936 | actin, beta pseudogene                                                             | 8.41  | 7.16  | -1.02 | 1.85<br>E-11 | 2.27<br>E-10 |
| 83468       | GLT8D2    | glycosyltransferase 8 domain containing 2                                          | 8.78  | 7.62  | -1.02 | 5.58<br>E-12 | 7.68<br>E-11 |
| 6132        | RPL8      | ribosomal protein L8                                                               | 8.96  | 7.83  | -1.02 | 6.49<br>E-12 | 8.83<br>E-11 |
| 64744       | SMAP2     | small ArfGAP2                                                                      | 10.26 | 9.23  | -1.02 | 3.29<br>E-12 | 4.77<br>E-11 |
| 1902        | LPAR1     | lysophosphatidic acid receptor 1                                                   | 10.23 | 9.20  | -1.02 | 1.69<br>E-11 | 2.10<br>E-10 |
| 10954       | PDIA5     | protein disulfide isomerase family A, member 5                                     | 8.79  | 7.63  | -1.01 | 2.71<br>E-12 | 4.00<br>E-11 |
| 64866       | CDCP1     | CUB domain containing protein 1                                                    | 8.06  | 6.65  | -1.01 | 9.71<br>E-12 | 1.27<br>E-10 |
| 2956        | MSH6      | mutS homolog 6 (E. coli)                                                           | 9.79  | 8.74  | -1.01 | 1.66<br>E-11 | 2.06<br>E-10 |
| 27131       | SNX5      | sorting nexin 5                                                                    | 9.27  | 8.18  | -1.01 | 8.98<br>E-12 | 1.18<br>E-10 |
| 84131       | CEP78     | centrosomal protein 78kDa                                                          | 8.64  | 7.47  | -1.01 | 1.44<br>E-12 | 2.28<br>E-11 |
| 2697        | GJA1      | gap junction protein, alpha 1, 43kDa                                               | 8.92  | 7.80  | -1.01 | 4.29<br>E-09 | 3.37<br>E-08 |
| 6237        | RRAS      | related RAS viral (r-ras) oncogene homolog                                         | 11.31 | 10.33 | -1.01 | 1.43<br>E-11 | 1.80<br>E-10 |
| 27235       | COQ2      | coenzyme Q2 homolog, prenyltransferase (yeast)                                     | 10.07 | 9.04  | -1.01 | 3.40<br>E-11 | 3.97<br>E-10 |
| 89822       | KCNK17    | potassium channel, subfamily K, member 17                                          | 7.85  | 6.39  | -1.01 | 1.42<br>E-11 | 1.79<br>E-10 |
| 23333       | DPY19L1   | dpy-19-like 1 (C. elegans)                                                         | 10.44 | 9.42  | -1.01 | 1.30<br>E-11 | 1.65<br>E-10 |
| 113115      | FAM54A    | family with sequence similarity 54, member A                                       | 8.05  | 6.66  | -1.01 | 1.69<br>E-10 | 1.73<br>E-09 |
| 64332       | NFKBIZ    | nuclear factor of kappa light polypeptide gene enhancer in B-cells inhibitor, zeta | 8.84  | 7.71  | -1.01 | 2.75<br>E-11 | 3.27<br>E-10 |

|        |               |                                                                   |       |       |       |              |              |
|--------|---------------|-------------------------------------------------------------------|-------|-------|-------|--------------|--------------|
| 6117   | RPA1          | replication protein A1,<br>70kDa                                  | 10.66 | 9.66  | -1.00 | 9.58<br>E-12 | 1.25<br>E-10 |
| 51293  | CD320         | CD320 molecule                                                    | 8.87  | 7.74  | -1.00 | 4.42<br>E-11 | 5.09<br>E-10 |
| 56992  | KIF15         | kinesin family<br>member 15                                       | 8.02  | 6.62  | -1.00 | 7.50<br>E-13 | 1.27<br>E-11 |
| 54962  | TIPIN         | TIMELESS<br>interacting protein                                   | 8.21  | 6.92  | -1.00 | 5.65<br>E-13 | 9.77<br>E-12 |
| 10026  | PIGK          | phosphatidylinositol<br>glycan anchor<br>biosynthesis, class K    | 9.27  | 8.19  | -1.00 | 2.96<br>E-10 | 2.90<br>E-09 |
| 3151   | HMG2          | high-mobility group<br>nucleosomal binding<br>domain 2            | 13.04 | 12.01 | -0.99 | 5.15<br>E-12 | 7.15<br>E-11 |
| 140885 | SIRPA         | signal-regulatory<br>protein alpha                                | 8.39  | 7.20  | -0.98 | 7.91<br>E-11 | 8.68<br>E-10 |
| 7398   | USP1          | ubiquitin specific<br>peptidase 1                                 | 8.71  | 7.60  | -0.98 | 6.19<br>E-12 | 8.46<br>E-11 |
| 5315   | PKM2          | pyruvate kinase,<br>muscle                                        | 11.82 | 10.85 | -0.96 | 6.90<br>E-11 | 7.67<br>E-10 |
| 8751   | ADAM1<br>5    | ADAM<br>metallopeptidase<br>domain 15                             | 8.30  | 7.13  | -0.94 | 1.20<br>E-10 | 1.27<br>E-09 |
| 706    | TSPO          | translocator protein<br>(18kDa)                                   | 11.67 | 10.75 | -0.93 | 5.87<br>E-11 | 6.62<br>E-10 |
| 2113   | ETS1          | v-ets erythroblastosis<br>virus E26 oncogene<br>homolog 1 (avian) | 9.07  | 8.07  | -0.92 | 1.15<br>E-10 | 1.22<br>E-09 |
| 730101 | LOC730<br>101 | hypothetical<br>LOC730101                                         | 7.96  | 6.76  | -0.88 | 3.55<br>E-10 | 3.42<br>E-09 |

<sup>a</sup>Myoblast Mean lists the mean value from three biologically independent primary human myoblast RNA samples collected under proliferative conditions while at low confluency.

<sup>b</sup>Myotube Mean lists the mean value from three biologically independent primary human myotube RNA samples grown to confluency and placed in differentiation media for 72 h.

<sup>c</sup>Fold change represents the difference between the myotube and myoblast values and is a log<sub>2</sub> value.

**Supplemental Table S2. Upregulated myogenic genes that are expressed at reduced levels in RD cells.**

| Entrez ID | Symbol  | Gene Name                                                                           | RD value <sup>a</sup> | Myotube value <sup>b</sup> | Fold change <sup>c</sup> | p-value  | FDR      |
|-----------|---------|-------------------------------------------------------------------------------------|-----------------------|----------------------------|--------------------------|----------|----------|
| 59        | ACTA2   | actin, alpha 2, smooth muscle, aorta                                                | 6.48                  | 13.48                      | 7.01                     | 8.67E-38 | 1.53E-34 |
| 845       | CASQ2   | calsequestrin 2 (cardiac muscle)                                                    | 6.84                  | 13.80                      | 6.95                     | 6.28E-38 | 1.23E-34 |
| 7134      | TNNC1   | troponin C type 1 (slow)                                                            | 7.66                  | 14.56                      | 6.90                     | 3.10E-33 | 1.61E-30 |
| 1410      | CRYAB   | crystallin, alpha B                                                                 | 6.95                  | 13.32                      | 6.38                     | 1.34E-34 | 1.03E-31 |
| 4626      | MYH8    | myosin, heavy chain 8, skeletal muscle, perinatal                                   | 6.48                  | 12.73                      | 6.24                     | 2.51E-32 | 1.08E-29 |
| 58        | ACTA1   | actin, alpha 1, skeletal muscle                                                     | 6.65                  | 12.88                      | 6.23                     | 7.86E-34 | 4.84E-31 |
| 1346      | COX7A1  | cytochrome c oxidase subunit VIIa polypeptide 1 (muscle)                            | 6.47                  | 12.46                      | 5.99                     | 3.88E-35 | 3.42E-32 |
| 8988      | HSPB3   | heat shock 27kDa protein 3                                                          | 7.71                  | 13.58                      | 5.86                     | 1.20E-33 | 7.07E-31 |
| 3316      | HSPB2   | heat shock 27kDa protein 2                                                          | 6.47                  | 12.13                      | 5.65                     | 9.92E-32 | 3.46E-29 |
| 5919      | RARRES2 | retinoic acid receptor responder (tazarotene induced) 2                             | 6.49                  | 12.12                      | 5.62                     | 1.42E-30 | 3.74E-28 |
| 7139      | TNNT2   | troponin T type 2 (cardiac)                                                         | 8.74                  | 14.24                      | 5.51                     | 4.07E-32 | 1.71E-29 |
| 8470      | SORBS2  | sorbin and SH3 domain containing 2                                                  | 6.47                  | 11.49                      | 5.02                     | 3.43E-33 | 1.73E-30 |
| 25890     | ABI3BP  | ABI family, member 3 (NESH) binding protein                                         | 6.50                  | 11.41                      | 4.91                     | 7.77E-32 | 2.80E-29 |
| 4635      | MYL4    | myosin, light chain 4, alkali; atrial, embryonic                                    | 9.11                  | 13.99                      | 4.91                     | 1.12E-29 | 2.41E-27 |
| 9200      | PTPLA   | protein tyrosine phosphatase-like (proline instead of catalytic arginine), member A | 6.52                  | 11.40                      | 4.89                     | 9.87E-33 | 4.84E-30 |
| 4208      | MEF2C   | myocyte enhancer factor 2C                                                          | 6.96                  | 11.80                      | 4.84                     | 3.05E-33 | 1.61E-30 |
| 9891      | NUAK1   | NUAK family, SNF1-                                                                  | 8.01                  | 12.77                      | 4.74                     | 6.15E-   | 2.31     |

|        |         |                                                     |       |       |      |          |           |
|--------|---------|-----------------------------------------------------|-------|-------|------|----------|-----------|
|        |         | like kinase, 1                                      |       |       |      | 32       | E-29      |
| 80206  | FHOD3   | formin homology 2 domain containing 3               | 6.21  | 10.90 | 4.69 | 2.82E-31 | 8.90 E-29 |
| 8076   | MFAP5   | microfibrillar associated protein 5                 | 6.49  | 11.13 | 4.64 | 6.03E-32 | 2.31 E-29 |
| 786    | CACNG1  | calcium channel, voltage-dependent, gamma subunit 1 | 6.95  | 11.56 | 4.61 | 1.25E-29 | 2.62 E-27 |
| 2162   | F13A1   | coagulation factor XIII, A1 polypeptide             | 6.44  | 11.02 | 4.59 | 5.38E-29 | 9.69 E-27 |
| 7140   | TNNT3   | troponin T type 3 (skeletal, fast)                  | 6.70  | 11.23 | 4.54 | 5.83E-32 | 2.29 E-29 |
| 2034   | EPAS1   | endothelial PAS domain protein 1                    | 6.90  | 11.36 | 4.48 | 2.98E-27 | 3.36 E-25 |
| 4625   | MYH7    | myosin, heavy chain 7, cardiac muscle, beta         | 6.54  | 11.01 | 4.47 | 1.88E-29 | 3.82 E-27 |
| 9235   | IL32    | interleukin 32                                      | 7.89  | 12.35 | 4.47 | 8.61E-29 | 1.46 E-26 |
| 347273 | MURC    | muscle-related coiled-coil protein                  | 7.26  | 11.73 | 4.46 | 3.60E-30 | 8.83 E-28 |
| 6588   | SLN     | sarcolipin                                          | 7.19  | 11.65 | 4.45 | 3.38E-28 | 4.81 E-26 |
| 10468  | FST     | follistatin                                         | 6.30  | 10.73 | 4.43 | 1.04E-31 | 3.53 E-29 |
| 10457  | GPNMB   | glycoprotein (transmembrane) nmb                    | 6.93  | 11.27 | 4.35 | 4.98E-26 | 3.90 E-24 |
| 4633   | MYL2    | myosin, light chain 2, regulatory, cardiac, slow    | 6.39  | 10.66 | 4.26 | 1.26E-27 | 1.53 E-25 |
| 8537   | BCAS1   | breast carcinoma amplified sequence 1               | 6.44  | 10.59 | 4.15 | 2.51E-30 | 6.33 E-28 |
| 5239   | PGM5    | phosphoglucomutase 5                                | 6.76  | 10.83 | 4.05 | 3.78E-31 | 1.11 E-28 |
| 1396   | CRIP1   | cysteine-rich protein 1 (intestinal)                | 6.90  | 10.95 | 4.04 | 1.09E-26 | 1.03 E-24 |
| 134265 | AFAP1L1 | actin filament associated protein 1-like 1          | 6.79  | 10.72 | 3.93 | 6.10E-26 | 4.64 E-24 |
| 22885  | ABLIM3  | actin binding LIM protein family, member 3          | 6.65  | 10.55 | 3.90 | 9.73E-30 | 2.15 E-27 |
| 4619   | MYH1    | myosin, heavy chain 1, skeletal muscle, adult       | 6.37  | 10.26 | 3.89 | 1.86E-28 | 2.91 E-26 |
| 4621   | MYH3    | myosin, heavy chain 3, skeletal muscle,             | 10.72 | 14.54 | 3.82 | 2.34E-27 | 2.68 E-25 |

| embryonic |              |                                                                      |       |       |      |              |              |
|-----------|--------------|----------------------------------------------------------------------|-------|-------|------|--------------|--------------|
| 116496    | FAM12<br>9A  | family with sequence<br>similarity 129,<br>member A                  | 6.55  | 10.35 | 3.80 | 4.42E-<br>21 | 1.25<br>E-19 |
| 859       | CAV3         | caveolin 3                                                           | 7.13  | 10.93 | 3.80 | 2.22E-<br>26 | 1.94<br>E-24 |
| 4620      | MYH2         | myosin, heavy chain<br>2, skeletal muscle,<br>adult                  | 6.53  | 10.30 | 3.77 | 1.46E-<br>26 | 1.35<br>E-24 |
| 57214     | KIAA11<br>99 | KIAA1199                                                             | 6.71  | 10.43 | 3.72 | 6.46E-<br>25 | 4.00<br>E-23 |
| 10777     | ARPP21       | cAMP-regulated<br>phosphoprotein,<br>21kDa                           | 7.36  | 11.08 | 3.72 | 3.00E-<br>28 | 4.37<br>E-26 |
| 158471    | PRUNE<br>2   | prune homolog 2<br>(Drosophila)                                      | 7.70  | 11.37 | 3.68 | 6.04E-<br>23 | 2.47<br>E-21 |
| 1158      | CKM          | creatine kinase,<br>muscle                                           | 8.14  | 11.83 | 3.68 | 2.06E-<br>26 | 1.84<br>E-24 |
| 7169      | TPM2         | tropomyosin 2 (beta)                                                 | 9.84  | 13.52 | 3.68 | 7.26E-<br>28 | 9.31<br>E-26 |
| 7130      | TNFAIP<br>6  | tumor necrosis factor,<br>alpha-induced protein<br>6                 | 6.75  | 10.43 | 3.68 | 2.24E-<br>25 | 1.51<br>E-23 |
| 26471     | NUPR1        | nuclear protein,<br>transcriptional<br>regulator, 1                  | 7.47  | 11.15 | 3.68 | 1.58E-<br>26 | 1.45<br>E-24 |
| 64084     | CLSTN<br>2   | calsyntenin 2                                                        | 6.64  | 10.26 | 3.62 | 1.05E-<br>26 | 1.01<br>E-24 |
| 9289      | GPR56        | G protein-coupled<br>receptor 56                                     | 6.40  | 10.00 | 3.60 | 1.46E-<br>26 | 1.35<br>E-24 |
| 8082      | SSPN         | sarcospan (Kras<br>oncogene-associated<br>gene)                      | 6.29  | 9.83  | 3.53 | 1.74E-<br>24 | 9.80<br>E-23 |
| 6711      | SPTBN<br>1   | spectrin, beta, non-<br>erythrocytic 1                               | 7.00  | 10.53 | 3.53 | 4.30E-<br>27 | 4.60<br>E-25 |
| 8128      | ST8SIA<br>2  | ST8 alpha-N-acetyl-<br>neuraminide alpha-<br>2,8-sialyltransferase 2 | 6.63  | 10.15 | 3.52 | 5.83E-<br>26 | 4.47<br>E-24 |
| 89795     | NAV3         | neuron navigator 3                                                   | 6.33  | 9.85  | 3.51 | 1.06E-<br>26 | 1.01<br>E-24 |
| 8736      | MYOM<br>1    | myomesin 1, 185kDa                                                   | 7.21  | 10.71 | 3.50 | 1.50E-<br>26 | 1.39<br>E-24 |
| 1339      | COX6A<br>2   | cytochrome c oxidase<br>subunit VIa<br>polypeptide 2                 | 7.05  | 10.56 | 3.50 | 1.95E-<br>23 | 8.83<br>E-22 |
| 4632      | MYL1         | myosin, light chain 1,                                               | 10.41 | 13.89 | 3.48 | 2.29E-       | 1.27         |

|        |          |                                                                           |       |       |      |          |           |
|--------|----------|---------------------------------------------------------------------------|-------|-------|------|----------|-----------|
|        |          | alkali; skeletal, fast                                                    |       |       |      | 24       | E-22      |
| 25878  | MXRA5    | matrix-remodelling associated 5                                           | 6.61  | 10.01 | 3.41 | 3.64E-24 | 1.93 E-22 |
| 22808  | MRAS     | muscle RAS oncogene homolog                                               | 6.82  | 10.19 | 3.36 | 2.51E-23 | 1.10 E-21 |
| 7412   | VCAM1    | vascular cell adhesion molecule 1                                         | 6.24  | 9.60  | 3.36 | 8.68E-21 | 2.32 E-19 |
| 58494  | JAM2     | junctional adhesion molecule 2                                            | 8.90  | 12.27 | 3.36 | 1.36E-25 | 9.43 E-24 |
| 23439  | ATP1B4   | ATPase, Na <sup>+</sup> /K <sup>+</sup> transporting, beta 4 polypeptide  | 6.39  | 9.72  | 3.33 | 8.42E-25 | 5.09 E-23 |
| 26353  | HSPB8    | heat shock 22kDa protein 8                                                | 6.82  | 10.14 | 3.32 | 2.64E-26 | 2.24 E-24 |
| 4608   | MYBP H   | myosin binding protein H                                                  | 10.33 | 13.67 | 3.31 | 3.43E-24 | 1.83 E-22 |
| 348    | APOE     | apolipoprotein E                                                          | 8.77  | 12.09 | 3.30 | 1.54E-24 | 8.80 E-23 |
| 7296   | TXNRD1   | thioredoxin reductase 1                                                   | 8.63  | 11.94 | 3.29 | 4.37E-24 | 2.28 E-22 |
| 7857   | SCG2     | secretogranin II                                                          | 6.63  | 9.92  | 3.29 | 7.33E-25 | 4.49 E-23 |
| 22809  | ATF5     | activating transcription factor 5                                         | 8.39  | 11.68 | 3.28 | 9.22E-20 | 2.03 E-18 |
| 6196   | RPS6KA2  | ribosomal protein S6 kinase, 90kDa, polypeptide 2                         | 7.24  | 10.53 | 3.28 | 7.49E-26 | 5.58 E-24 |
| 477    | ATP1A2   | ATPase, Na <sup>+</sup> /K <sup>+</sup> transporting, alpha 2 polypeptide | 6.30  | 9.53  | 3.23 | 9.79E-28 | 1.22 E-25 |
| 22924  | MAPRE3   | microtubule-associated protein, RP/EB family, member 3                    | 6.95  | 10.18 | 3.23 | 1.46E-23 | 6.72 E-22 |
| 157285 | SGK223   | homolog of rat pragma of Rnd2                                             | 7.50  | 10.68 | 3.18 | 3.06E-26 | 2.57 E-24 |
| 64115  | C10orf54 | chromosome 10 open reading frame 54                                       | 6.43  | 9.60  | 3.17 | 3.56E-22 | 1.27 E-20 |
| 1601   | DAB2     | disabled homolog 2, mitogen-responsive phosphoprotein (Drosophila)        | 8.06  | 11.19 | 3.15 | 9.58E-26 | 7.02 E-24 |
| 389827 | TMEM8C   | transmembrane protein 8C                                                  | 7.95  | 11.09 | 3.14 | 1.30E-25 | 9.13 E-24 |
| 80144  | FRAS1    | Fraser syndrome 1                                                         | 6.64  | 9.75  | 3.11 | 5.40E-21 | 1.50 E-19 |



|        |           |                                                                 |      |       |      |          |          |
|--------|-----------|-----------------------------------------------------------------|------|-------|------|----------|----------|
| 3270   | HRC       | histidine rich calcium binding protein                          | 8.99 | 12.10 | 3.11 | 3.17E-26 | 2.62E-24 |
| 88     | ACTN2     | actinin, alpha 2                                                | 7.08 | 10.18 | 3.10 | 1.25E-23 | 5.90E-22 |
| 81493  | SYNC      | syncoilin, intermediate filament protein                        | 6.76 | 9.79  | 3.03 | 1.92E-23 | 8.67E-22 |
| 55034  | MOCO S    | molybdenum cofactor sulfurase                                   | 6.62 | 9.64  | 3.03 | 1.90E-21 | 5.78E-20 |
| 29993  | PACSI N1  | protein kinase C and casein kinase substrate in neurons 1       | 7.09 | 10.09 | 3.00 | 1.16E-25 | 8.23E-24 |
| 10079  | ATP9A     | ATPase, class II, type 9A                                       | 6.98 | 9.98  | 2.99 | 1.22E-25 | 8.59E-24 |
| 83937  | RASSF 4   | Ras association (RalGDS/AF-6) domain family member 4            | 7.53 | 10.50 | 2.98 | 4.48E-25 | 2.84E-23 |
| 256691 | MAMD C2   | MAM domain containing 2                                         | 9.50 | 12.46 | 2.95 | 8.79E-22 | 2.92E-20 |
| 782    | CACNB 1   | calcium channel, voltage-dependent, beta 1 subunit              | 6.49 | 9.42  | 2.94 | 7.45E-25 | 4.55E-23 |
| 2634   | GBP2      | guanylate binding protein 2, interferon-inducible               | 6.63 | 9.55  | 2.93 | 7.54E-25 | 4.59E-23 |
| 54937  | SOHLH 2   | spermatogenesis and oogenesis specific basic helix-loop-helix 2 | 6.68 | 9.61  | 2.93 | 2.16E-22 | 7.99E-21 |
| 166336 | PRICK LE2 | prickle homolog 2 (Drosophila)                                  | 7.12 | 10.05 | 2.92 | 1.78E-25 | 1.22E-23 |
| 84617  | TUBB6     | tubulin, beta 6                                                 | 9.27 | 12.21 | 2.92 | 7.18E-23 | 2.89E-21 |
| 94241  | TP53IN P1 | tumor protein p53 inducible nuclear protein 1                   | 8.02 | 10.93 | 2.91 | 3.60E-22 | 1.28E-20 |
| 861    | RUNX1     | runt-related transcription factor 1                             | 7.62 | 10.51 | 2.89 | 8.31E-26 | 6.14E-24 |
| 5730   | PTGDS     | prostaglandin D2 synthase 21kDa (brain)                         | 7.72 | 10.61 | 2.89 | 8.76E-25 | 5.26E-23 |
| 7111   | TMOD1     | tropomodulin 1                                                  | 7.45 | 10.32 | 2.87 | 3.11E-26 | 2.58E-24 |
| 57571  | CARNS 1   | carnosine synthase 1                                            | 6.44 | 9.29  | 2.84 | 3.35E-22 | 1.20E-20 |
| 30061  | SLC40     | solute carrier family                                           | 7.20 | 10.03 | 2.83 | 1.14E-   | 6.69     |

|        |          |                                                    |       |       |      |          |           |
|--------|----------|----------------------------------------------------|-------|-------|------|----------|-----------|
|        | A1       | 40 (iron-regulated transporter), member 1          |       |       |      | 24       | E-23      |
| 9915   | ARNT2    | aryl-hydrocarbon receptor nuclear translocator 2   | 6.48  | 9.30  | 2.82 | 6.13E-22 | 2.09 E-20 |
| 414325 | DEFB103A | defensin, beta 103A                                | 6.60  | 9.41  | 2.81 | 6.25E-19 | 1.15 E-17 |
| 2348   | FOLR1    | folate receptor 1 (adult)                          | 7.48  | 10.29 | 2.81 | 7.52E-26 | 5.58 E-24 |
| 22882  | ZHX2     | zinc fingers and homeoboxes 2                      | 6.64  | 9.45  | 2.81 | 2.79E-24 | 1.51 E-22 |
| 79933  | SYNPO2L  | synaptopodin 2-like                                | 7.79  | 10.59 | 2.80 | 5.29E-23 | 2.19 E-21 |
| 10611  | PDLIM5   | PDZ and LIM domain 5                               | 7.41  | 10.21 | 2.79 | 1.84E-24 | 1.03 E-22 |
| 5997   | RGS2     | regulator of G-protein signaling 2, 24kDa          | 7.88  | 10.67 | 2.79 | 2.65E-24 | 1.44 E-22 |
| 22801  | ITGA11   | integrin, alpha 11                                 | 7.06  | 9.85  | 2.78 | 3.60E-21 | 1.04 E-19 |
| 28227  | PPP2R3B  | protein phosphatase 2, regulatory subunit B", beta | 7.08  | 9.84  | 2.76 | 4.24E-23 | 1.79 E-21 |
| 55608  | ANKRD10  | ankyrin repeat domain 10                           | 7.48  | 10.23 | 2.75 | 7.00E-23 | 2.84 E-21 |
| 26137  | ZBTB20   | zinc finger and BTB domain containing 20           | 6.79  | 9.53  | 2.73 | 9.50E-18 | 1.46 E-16 |
| 8611   | PPAP2A   | phosphatidic acid phosphatase type 2A              | 7.58  | 10.28 | 2.71 | 8.86E-23 | 3.47 E-21 |
| 4656   | MYOG     | myogenin (myogenic factor 4)                       | 9.36  | 12.06 | 2.69 | 1.22E-22 | 4.70 E-21 |
| 90441  | ZNF622   | zinc finger protein 622                            | 9.69  | 12.38 | 2.68 | 1.05E-23 | 5.01 E-22 |
| 1026   | CDKN1A   | cyclin-dependent kinase inhibitor 1A (p21, Cip1)   | 12.04 | 14.72 | 2.68 | 5.67E-25 | 3.53 E-23 |
| 10630  | PDPN     | podoplanin                                         | 6.65  | 9.33  | 2.68 | 2.98E-22 | 1.08 E-20 |
| 57159  | TRIM54   | tripartite motif containing 54                     | 6.50  | 9.15  | 2.65 | 9.12E-24 | 4.39 E-22 |
| 9201   | DCLK1    | doublecortin-like kinase 1                         | 6.86  | 9.51  | 2.65 | 1.44E-23 | 6.66 E-22 |
| 5412   | UBL3     | ubiquitin-like 3                                   | 7.87  | 10.51 | 2.65 | 3.49E-25 | 2.28 E-23 |
| 400818 | NBPF9    | neuroblastoma breakpoint family, member 9          | 10.25 | 12.88 | 2.63 | 3.00E-15 | 2.96 E-14 |

|           |           |                                                                                |       |       |      |          |          |
|-----------|-----------|--------------------------------------------------------------------------------|-------|-------|------|----------|----------|
| 5269      | SERPIN B6 | serpin peptidase inhibitor, clade B (ovalbumin), member 6                      | 10.52 | 13.16 | 2.63 | 7.48E-24 | 3.69E-22 |
| 8140      | SLC7A5    | solute carrier family 7 (cationic amino acid transporter, y+ system), member 5 | 10.15 | 12.76 | 2.60 | 3.09E-22 | 1.12E-20 |
| 389136    | VGLL3     | vestigial like 3 (Drosophila)                                                  | 7.15  | 9.74  | 2.59 | 1.40E-21 | 4.45E-20 |
| 9499      | MYOT      | myotilin                                                                       | 6.30  | 8.90  | 2.59 | 4.07E-22 | 1.43E-20 |
| 114299    | PALM2     | paralectin 2                                                                   | 7.71  | 10.27 | 2.57 | 6.43E-23 | 2.62E-21 |
| 84886     | C1orf198  | chromosome 1 open reading frame 198                                            | 8.84  | 11.42 | 2.57 | 2.46E-23 | 1.09E-21 |
| 100132406 | NBPF10    | neuroblastoma breakpoint family, member 10                                     | 10.32 | 12.89 | 2.57 | 1.46E-14 | 1.30E-13 |
| 7102      | TSPAN7    | tetraspanin 7                                                                  | 7.27  | 9.84  | 2.56 | 1.64E-22 | 6.17E-21 |
| 7421      | VDR       | vitamin D (1,25-dihydroxyvitamin D3) receptor                                  | 6.55  | 9.11  | 2.56 | 8.86E-24 | 4.28E-22 |
| 11341     | SCRG1     | stimulator of chondrogenesis 1                                                 | 6.42  | 8.98  | 2.56 | 9.18E-22 | 3.05E-20 |
| 160622    | GRASP     | GRP1 (general receptor for phosphoinositides 1)-associated scaffold protein    | 6.99  | 9.55  | 2.56 | 3.69E-22 | 1.31E-20 |
| 165904    | XIRP1     | xin actin-binding repeat containing 1                                          | 6.37  | 8.93  | 2.56 | 8.60E-21 | 2.30E-19 |
| 131377    | KBTBD5    | kelch repeat and BTB (POZ) domain containing 5                                 | 7.24  | 9.80  | 2.56 | 4.00E-20 | 9.41E-19 |
| 144165    | PRICKLE1  | prickle homolog 1 (Drosophila)                                                 | 6.81  | 9.37  | 2.55 | 1.24E-23 | 5.83E-22 |
| 11155     | LDB3      | LIM domain binding 3                                                           | 6.71  | 9.25  | 2.54 | 4.04E-19 | 7.80E-18 |
| 677800    | SNORA12   | small nucleolar RNA, H/ACA box 12                                              | 6.77  | 9.31  | 2.53 | 6.35E-23 | 2.59E-21 |
| 4320      | MMP11     | matrix metalloproteinase 11 (stromelysin 3)                                    | 9.36  | 11.90 | 2.52 | 4.34E-22 | 1.51E-20 |
| 6345      | SRL       | sarcalumenin                                                                   | 9.08  | 11.61 | 2.52 | 7.92E-   | 3.88     |

|        |          |                                                                         |       |       |      |          |          |
|--------|----------|-------------------------------------------------------------------------|-------|-------|------|----------|----------|
|        |          |                                                                         |       |       |      | 24       | E-22     |
| 8445   | DYRK2    | dual-specificity tyrosine-(Y)-phosphorylation regulated kinase 2        | 7.94  | 10.45 | 2.51 | 3.36E-21 | 9.76E-20 |
| 23095  | KIF1B    | kinesin family member 1B                                                | 8.22  | 10.71 | 2.50 | 2.91E-20 | 7.00E-19 |
| 127294 | MYOM3    | myomesin family, member 3                                               | 7.25  | 9.76  | 2.50 | 8.63E-23 | 3.39E-21 |
| 9260   | PDLIM7   | PDZ and LIM domain 7 (enigma)                                           | 10.46 | 12.96 | 2.50 | 3.34E-24 | 1.80E-22 |
| 51339  | DACT1    | dapper, antagonist of beta-catenin, homolog 1 ( <i>Xenopus laevis</i> ) | 6.55  | 9.04  | 2.49 | 3.37E-21 | 9.76E-20 |
| 4199   | ME1      | malic enzyme 1, NADP(+)-dependent, cytosolic                            | 7.11  | 9.59  | 2.48 | 3.85E-22 | 1.36E-20 |
| 10443  | N4BP2L2  | NEDD4 binding protein 2-like 2                                          | 7.12  | 9.59  | 2.47 | 1.06E-23 | 5.04E-22 |
| 2889   | RAPGEF1  | Rap guanine nucleotide exchange factor (GEF) 1                          | 9.91  | 12.38 | 2.47 | 1.79E-22 | 6.70E-21 |
| 59285  | CACNG6   | calcium channel, voltage-dependent, gamma subunit 6                     | 7.19  | 9.64  | 2.45 | 5.86E-21 | 1.61E-19 |
| 8365   | HIST1H4H | histone cluster 1, H4h                                                  | 6.93  | 9.38  | 2.44 | 1.21E-21 | 3.90E-20 |
| 7164   | TPD52L1  | tumor protein D52-like 1                                                | 6.75  | 9.18  | 2.43 | 5.05E-21 | 1.41E-19 |
| 25798  | BRI3     | brain protein I3                                                        | 9.83  | 12.27 | 2.43 | 9.09E-23 | 3.55E-21 |
| 7125   | TNNC2    | troponin C type 2 (fast)                                                | 9.99  | 12.43 | 2.42 | 8.20E-22 | 2.75E-20 |
| 1028   | CDKN1C   | cyclin-dependent kinase inhibitor 1C (p57, Kip2)                        | 7.40  | 9.82  | 2.41 | 1.73E-19 | 3.59E-18 |
| 10930  | APOBE2   | apolipoprotein B mRNA editing enzyme, catalytic polypeptide-like 2      | 8.37  | 10.80 | 2.41 | 2.23E-20 | 5.57E-19 |
| 4130   | MAP1A    | microtubule-associated protein 1A                                       | 8.66  | 11.07 | 2.41 | 1.46E-21 | 4.61E-20 |
| 207107 | SFTA1P   | surfactant associated 1 (pseudogene)                                    | 9.31  | 11.72 | 2.40 | 1.77E-21 | 5.46E-20 |
| 4861   | NPAS1    | neuronal PAS domain protein 1                                           | 6.80  | 9.20  | 2.40 | 1.06E-21 | 3.46E-20 |

|               |             |                                                                                                     |      |       |      |              |              |
|---------------|-------------|-----------------------------------------------------------------------------------------------------|------|-------|------|--------------|--------------|
| 5159          | PDGFR<br>B  | platelet-derived<br>growth factor receptor,<br>beta polypeptide                                     | 8.03 | 10.42 | 2.39 | 6.82E-<br>19 | 1.25<br>E-17 |
| 10966         | RAB40<br>B  | RAB40B, member<br>RAS oncogene family                                                               | 8.61 | 10.99 | 2.39 | 4.79E-<br>21 | 1.34<br>E-19 |
| 84075         | FSCB        | fibrous sheath<br>CABYR binding<br>protein                                                          | 6.49 | 8.86  | 2.37 | 1.63E-<br>19 | 3.41<br>E-18 |
| 51706         | CYB5R<br>1  | cytochrome b5<br>reductase 1                                                                        | 9.99 | 12.35 | 2.36 | 5.52E-<br>22 | 1.89<br>E-20 |
| 100133<br>941 | CD24        | CD24 molecule                                                                                       | 6.34 | 8.70  | 2.35 | 2.47E-<br>21 | 7.34<br>E-20 |
| 56999         | ADAM<br>TS9 | ADAM<br>metallopeptidase with<br>thrombospondin type<br>1 motif, 9                                  | 6.35 | 8.70  | 2.35 | 1.24E-<br>20 | 3.22<br>E-19 |
| 377007        | KLHL3<br>0  | kelch-like 30<br>(Drosophila)                                                                       | 7.64 | 9.97  | 2.34 | 1.94E-<br>20 | 4.89<br>E-19 |
| 83445         | GSG1        | germ cell associated 1                                                                              | 6.37 | 8.70  | 2.34 | 1.72E-<br>21 | 5.32<br>E-20 |
| 2273          | FHL1        | four and a half LIM<br>domains 1                                                                    | 8.37 | 10.68 | 2.31 | 8.33E-<br>22 | 2.78<br>E-20 |
| 5308          | PITX2       | paired-like<br>homeodomain 2                                                                        | 8.28 | 10.59 | 2.31 | 3.99E-<br>22 | 1.40<br>E-20 |
| 51155         | HN1         | hematological and<br>neurological expressed<br>1                                                    | 9.04 | 11.34 | 2.30 | 1.20E-<br>19 | 2.57<br>E-18 |
| 148738        | HFE2        | hemochromatosis type<br>2 (juvenile)                                                                | 7.72 | 10.01 | 2.29 | 1.07E-<br>20 | 2.83<br>E-19 |
| 23676         | SMPX        | small muscle protein,<br>X-linked                                                                   | 8.19 | 10.47 | 2.28 | 5.86E-<br>19 | 1.09<br>E-17 |
| 604           | BCL6        | B-cell CLL/lymphoma<br>6                                                                            | 7.54 | 9.81  | 2.28 | 2.72E-<br>23 | 1.18<br>E-21 |
| 23612         | PHLDA<br>3  | pleckstrin homology-<br>like domain, family A,<br>member 3                                          | 8.14 | 10.41 | 2.27 | 1.26E-<br>21 | 4.04<br>E-20 |
| 9839          | ZEB2        | zinc finger E-box<br>binding homeobox 2                                                             | 7.61 | 9.88  | 2.27 | 3.34E-<br>18 | 5.50<br>E-17 |
| 6520          | SLC3A<br>2  | solute carrier family 3<br>(activators of dibasic<br>and neutral amino acid<br>transport), member 2 | 9.28 | 11.54 | 2.27 | 1.35E-<br>17 | 2.00<br>E-16 |
| 4134          | MAP4        | microtubule-<br>associated protein 4                                                                | 7.38 | 9.64  | 2.26 | 1.48E-<br>18 | 2.58<br>E-17 |
| 162394        | SLFN5       | schlafen family<br>member 5                                                                         | 6.87 | 9.13  | 2.25 | 1.45E-<br>17 | 2.14<br>E-16 |

|        |          |                                                                                     |       |       |      |          |          |
|--------|----------|-------------------------------------------------------------------------------------|-------|-------|------|----------|----------|
| 23066  | CAND2    | cullin-associated and neddylation-dissociated 2 (putative)                          | 6.92  | 9.17  | 2.25 | 2.51E-20 | 6.18E-19 |
| 6664   | SOX11    | SRY (sex determining region Y)-box 11                                               | 9.88  | 12.14 | 2.25 | 2.34E-20 | 5.80E-19 |
| 12     | SERPINA3 | serpin peptidase inhibitor, clade A (alpha-1 antiproteinase, antitrypsin), member 3 | 6.57  | 8.80  | 2.23 | 3.09E-19 | 6.14E-18 |
| 1837   | DTNA     | dystrobrevin, alpha                                                                 | 8.29  | 10.49 | 2.22 | 5.86E-20 | 1.32E-18 |
| 6249   | CLIP1    | CAP-GLY domain containing linker protein 1                                          | 7.41  | 9.62  | 2.22 | 8.99E-18 | 1.39E-16 |
| 23596  | OPN3     | opsin 3                                                                             | 7.20  | 9.41  | 2.21 | 2.47E-21 | 7.34E-20 |
| 224    | ALDH3A2  | aldehyde dehydrogenase 3 family, member A2                                          | 7.88  | 10.09 | 2.21 | 8.50E-21 | 2.28E-19 |
| 10231  | RCAN2    | regulator of calcineurin 2                                                          | 7.14  | 9.35  | 2.20 | 5.87E-21 | 1.61E-19 |
| 8821   | INPP4B   | inositol polyphosphate-4-phosphatase, type II, 105kDa                               | 8.53  | 10.72 | 2.19 | 3.46E-18 | 5.68E-17 |
| 22982  | DIP2C    | DIP2 disco-interacting protein 2 homolog C (Drosophila)                             | 7.26  | 9.45  | 2.18 | 1.93E-19 | 3.99E-18 |
| 255488 | RNF144B  | ring finger protein 144B                                                            | 6.34  | 8.52  | 2.18 | 7.08E-22 | 2.39E-20 |
| 222166 | C7orf41  | chromosome 7 open reading frame 41                                                  | 10.36 | 12.52 | 2.17 | 5.31E-20 | 1.21E-18 |
| 10133  | OPTN     | optineurin                                                                          | 7.50  | 9.65  | 2.17 | 3.69E-21 | 1.06E-19 |
| 113146 | AHNAK2   | AHNAK nucleoprotein 2                                                               | 6.99  | 9.14  | 2.15 | 4.14E-15 | 4.00E-14 |
| 53632  | PRKAG3   | protein kinase, AMP-activated, gamma 3 non-catalytic subunit                        | 6.32  | 8.46  | 2.14 | 1.50E-21 | 4.73E-20 |
| 115207 | KCTD12   | potassium channel tetramerisation domain containing 12                              | 7.70  | 9.83  | 2.13 | 6.22E-20 | 1.39E-18 |
| 51313  | FAM198B  | family with sequence similarity 198,                                                | 6.93  | 9.05  | 2.12 | 2.29E-20 | 5.69E-19 |

|        |          | member B                                                                                                                                   |       |       |      |          |           |
|--------|----------|--------------------------------------------------------------------------------------------------------------------------------------------|-------|-------|------|----------|-----------|
| 113451 | ADC      | arginine decarboxylase                                                                                                                     | 8.06  | 10.18 | 2.12 | 5.69E-22 | 1.94 E-20 |
| 1109   | AKR1C4   | aldo-keto reductase family 1, member C4 (chlordecone reductase; 3-alpha hydroxysteroid dehydrogenase, type I; dihydrodiol dehydrogenase 4) | 8.01  | 10.13 | 2.12 | 2.32E-21 | 6.96 E-20 |
| 23645  | PPP1R15A | protein phosphatase 1, regulatory (inhibitor) subunit 15A                                                                                  | 9.29  | 11.40 | 2.12 | 2.02E-20 | 5.04 E-19 |
| 716    | C1S      | complement component 1, s subcomponent                                                                                                     | 6.60  | 8.71  | 2.11 | 2.21E-19 | 4.52 E-18 |
| 3799   | KIF5B    | kinesin family member 5B                                                                                                                   | 8.38  | 10.49 | 2.11 | 9.18E-20 | 2.02 E-18 |
| 388551 | CEACAM16 | carcinoembryonic antigen-related cell adhesion molecule 16                                                                                 | 6.82  | 8.93  | 2.11 | 1.19E-20 | 3.11 E-19 |
| 29895  | MYLPF    | myosin light chain, phosphorylatable, fast skeletal muscle                                                                                 | 12.45 | 14.56 | 2.11 | 2.44E-22 | 9.03 E-21 |
| 84814  | PPAPDC3  | phosphatidic acid phosphatase type 2 domain containing 3                                                                                   | 7.37  | 9.48  | 2.10 | 2.98E-22 | 1.08 E-20 |
| 23564  | DDAH2    | dimethylarginine dimethylaminohydrolase 2                                                                                                  | 8.34  | 10.43 | 2.09 | 8.05E-21 | 2.17 E-19 |
| 8326   | FZD9     | frizzled homolog 9 (Drosophila)                                                                                                            | 7.44  | 9.53  | 2.08 | 6.08E-21 | 1.67 E-19 |
| 9236   | CCPG1    | cell cycle progression 1                                                                                                                   | 7.58  | 9.65  | 2.08 | 4.40E-20 | 1.02 E-18 |
| 66008  | TRAK2    | trafficking protein, kinesin binding 2                                                                                                     | 9.38  | 11.48 | 2.08 | 1.66E-18 | 2.87 E-17 |
| 1917   | EEF1A2   | eukaryotic translation elongation factor 1 alpha 2                                                                                         | 8.19  | 10.27 | 2.07 | 1.34E-15 | 1.41 E-14 |
| 734    | OSGIN2   | oxidative stress induced growth inhibitor family member 2                                                                                  | 7.08  | 9.14  | 2.07 | 4.82E-20 | 1.11 E-18 |
| 10217  | CTDSP1   | CTD (carboxy-terminal domain, RNA                                                                                                          | 9.05  | 11.10 | 2.06 | 7.12E-21 | 1.94 E-19 |

|        |          |                                                                             |       |       |      |          |          |
|--------|----------|-----------------------------------------------------------------------------|-------|-------|------|----------|----------|
|        |          | polymerase II, polypeptide A) small phosphatase-like                        |       |       |      |          |          |
| 440    | ASNS     | asparagine synthetase (glutamine-hydrolyzing)                               | 11.11 | 13.17 | 2.06 | 7.85E-17 | 1.01E-15 |
| 11149  | BVES     | blood vessel epicardial substance                                           | 6.33  | 8.39  | 2.05 | 3.34E-19 | 6.58E-18 |
| 10124  | ARL4A    | ADP-ribosylation factor-like 4A                                             | 8.47  | 10.51 | 2.05 | 4.94E-20 | 1.14E-18 |
| 1545   | CYP1B1   | cytochrome P450, family 1, subfamily B, polypeptide 1                       | 6.53  | 8.58  | 2.04 | 2.69E-17 | 3.81E-16 |
| 1160   | CKMT2    | creatine kinase, mitochondrial 2 (sarcomeric)                               | 6.58  | 8.61  | 2.03 | 2.75E-20 | 6.70E-19 |
| 130827 | TMEM182  | transmembrane protein 182                                                   | 6.73  | 8.76  | 2.03 | 5.05E-19 | 9.56E-18 |
| 6444   | SGCD     | sarcoglycan, delta (35kDa dystrophin-associated glycoprotein)               | 7.95  | 9.98  | 2.03 | 3.74E-15 | 3.65E-14 |
| 79156  | PLEKH F1 | pleckstrin homology domain containing, family F (with FYVE domain) member 1 | 7.14  | 9.17  | 2.03 | 1.46E-18 | 2.55E-17 |
| 7273   | TTN      | titin                                                                       | 6.33  | 8.36  | 2.02 | 5.49E-17 | 7.27E-16 |
| 3418   | IDH2     | isocitrate dehydrogenase 2 (NADP+), mitochondrial                           | 9.25  | 11.26 | 2.02 | 4.30E-20 | 1.00E-18 |
| 4088   | SMAD3    | SMAD family member 3                                                        | 8.92  | 10.92 | 2.00 | 3.77E-19 | 7.31E-18 |
| 6450   | SH3BGR   | SH3 domain binding glutamic acid-rich protein                               | 6.89  | 8.88  | 1.99 | 4.53E-17 | 6.08E-16 |
| 114907 | FBXO32   | F-box protein 32                                                            | 8.28  | 10.27 | 1.99 | 1.18E-16 | 1.46E-15 |
| 57761  | TRIB3    | tribbles homolog 3 (Drosophila)                                             | 8.79  | 10.79 | 1.99 | 1.75E-09 | 7.10E-09 |
| 715    | C1R      | complement component 1, r subcomponent                                      | 6.80  | 8.79  | 1.99 | 2.59E-16 | 3.04E-15 |
| 8707   | B3GALT2  | UDP-Gal:betaGlcNAc beta 1,3-                                                | 7.08  | 9.07  | 1.99 | 9.81E-19 | 1.76E-17 |



|        |         |                                                              |       |       |      |          |          |
|--------|---------|--------------------------------------------------------------|-------|-------|------|----------|----------|
|        |         | galactosyltransferase, polypeptide 2                         |       |       |      |          |          |
| 779    | CACNA1S | calcium channel, voltage-dependent, L type, alpha 1S subunit | 6.96  | 8.94  | 1.98 | 4.78E-17 | 6.37E-16 |
| 84940  | CORO6   | coronin 6                                                    | 7.33  | 9.31  | 1.97 | 2.76E-17 | 3.89E-16 |
| 7707   | ZNF148  | zinc finger protein 148                                      | 8.24  | 10.20 | 1.97 | 1.17E-19 | 2.51E-18 |
| 4205   | MEF2A   | myocyte enhancer factor 2A                                   | 7.12  | 9.09  | 1.96 | 9.47E-20 | 2.08E-18 |
| 8975   | USP13   | ubiquitin specific peptidase 13 (isopeptidase T-3)           | 7.73  | 9.68  | 1.96 | 1.43E-18 | 2.51E-17 |
| 55573  | CDV3    | CDV3 homolog (mouse)                                         | 9.65  | 11.62 | 1.96 | 1.86E-20 | 4.70E-19 |
| 7145   | TNS1    | tensin 1                                                     | 7.59  | 9.54  | 1.96 | 1.63E-18 | 2.83E-17 |
| 3655   | ITGA6   | integrin, alpha 6                                            | 7.00  | 8.96  | 1.95 | 5.04E-19 | 9.56E-18 |
| 144363 | LYRM5   | LYR motif containing 5                                       | 8.51  | 10.45 | 1.94 | 7.74E-19 | 1.41E-17 |
| 9770   | RASSF2  | Ras association (RalGDS/AF-6) domain family member 2         | 6.82  | 8.76  | 1.94 | 1.56E-17 | 2.30E-16 |
| 1674   | DES     | desmin                                                       | 10.17 | 12.12 | 1.94 | 2.61E-20 | 6.39E-19 |
| 26512  | INTS6   | integrator complex subunit 6                                 | 6.79  | 8.73  | 1.93 | 1.19E-16 | 1.47E-15 |
| 84216  | TMEM17  | transmembrane protein 117                                    | 6.89  | 8.82  | 1.93 | 1.87E-19 | 3.87E-18 |
| 8908   | GYG2    | glycogenin 2                                                 | 7.97  | 9.90  | 1.93 | 6.06E-20 | 1.36E-18 |
| 8878   | SQSTM1  | sequestosome 1                                               | 11.72 | 13.65 | 1.92 | 4.16E-19 | 8.01E-18 |
| 9518   | GDF15   | growth differentiation factor 15                             | 8.85  | 10.78 | 1.92 | 1.16E-15 | 1.23E-14 |
| 1400   | CRMP1   | collapsin response mediator protein 1                        | 9.19  | 11.11 | 1.92 | 2.00E-19 | 4.12E-18 |
| 166614 | DCLK2   | doublecortin-like kinase 2                                   | 6.18  | 8.09  | 1.92 | 3.60E-19 | 6.99E-18 |
| 140465 | MYL6B   | myosin, light chain 6B, alkali, smooth muscle and non-muscle | 12.47 | 14.38 | 1.91 | 2.27E-21 | 6.85E-20 |

|        |          |                                                                                                 |       |       |      |          |          |
|--------|----------|-------------------------------------------------------------------------------------------------|-------|-------|------|----------|----------|
| 1301   | COL11A1  | collagen, type XI, alpha 1                                                                      | 8.65  | 10.55 | 1.90 | 3.98E-17 | 5.43E-16 |
| 10962  | MLLT11   | myeloid/lymphoid or mixed-lineage leukemia (trithorax homolog, Drosophila); translocated to, 11 | 11.02 | 12.92 | 1.89 | 4.54E-21 | 1.27E-19 |
| 122809 | SOCS4    | suppressor of cytokine signaling 4                                                              | 6.68  | 8.58  | 1.89 | 3.73E-20 | 8.82E-19 |
| 23499  | MACF1    | microtubule-actin crosslinking factor 1                                                         | 9.25  | 11.14 | 1.89 | 2.81E-12 | 1.72E-11 |
| 23630  | KCNE1L   | KCNE1-like                                                                                      | 6.45  | 8.33  | 1.88 | 9.58E-18 | 1.47E-16 |
| 1512   | CTSH     | cathepsin H                                                                                     | 7.45  | 9.33  | 1.87 | 6.78E-18 | 1.07E-16 |
| 1031   | CDKN2C   | cyclin-dependent kinase inhibitor 2C (p18, inhibits CDK4)                                       | 7.83  | 9.69  | 1.87 | 1.52E-19 | 3.19E-18 |
| 5106   | PCK2     | phosphoenolpyruvate carboxykinase 2 (mitochondrial)                                             | 8.75  | 10.62 | 1.87 | 9.70E-14 | 7.49E-13 |
| 6286   | S100P    | S100 calcium binding protein P                                                                  | 6.51  | 8.39  | 1.86 | 3.86E-12 | 2.31E-11 |
| 140825 | NEURL2   | neuralized homolog 2 (Drosophila)                                                               | 7.16  | 9.02  | 1.86 | 1.32E-17 | 1.97E-16 |
| 6510   | SLC1A5   | solute carrier family 1 (neutral amino acid transporter), member 5                              | 8.16  | 10.02 | 1.85 | 2.35E-13 | 1.71E-12 |
| 8851   | CDK5R1   | cyclin-dependent kinase 5, regulatory subunit 1 (p35)                                           | 7.87  | 9.72  | 1.85 | 2.17E-16 | 2.59E-15 |
| 151126 | ZNF385B  | zinc finger protein 385B                                                                        | 6.54  | 8.40  | 1.85 | 5.35E-18 | 8.56E-17 |
| 5361   | PLXNA1   | plexin A1                                                                                       | 8.05  | 9.90  | 1.85 | 1.01E-19 | 2.21E-18 |
| 23294  | ANKS1A   | ankyrin repeat and sterile alpha motif domain containing 1A                                     | 9.61  | 11.47 | 1.85 | 1.39E-19 | 2.95E-18 |
| 94134  | ARHGAP12 | Rho GTPase activating protein 12                                                                | 7.66  | 9.48  | 1.83 | 1.36E-18 | 2.39E-17 |
| 54507  | ADAMTSL4 | ADAMTS-like 4                                                                                   | 7.02  | 8.84  | 1.83 | 1.70E-19 | 3.55E-18 |
| 56997  | ADCK3    | aarF domain containing kinase 3                                                                 | 8.17  | 10.00 | 1.83 | 7.29E-19 | 1.33E-17 |
| 54843  | SYTL2    | synaptotagmin-like 2                                                                            | 7.99  | 9.81  | 1.82 | 5.46E-18 | 8.73E-17 |

|       |          |                                                              |       |       |      |          |          |
|-------|----------|--------------------------------------------------------------|-------|-------|------|----------|----------|
| 3759  | KCNJ2    | potassium inwardly-rectifying channel, subfamily J, member 2 | 6.42  | 8.23  | 1.81 | 1.29E-17 | 1.93E-16 |
| 836   | CASP3    | caspase 3, apoptosis-related cysteine peptidase              | 9.92  | 11.73 | 1.81 | 2.08E-19 | 4.27E-18 |
| 55615 | PRR5     | proline rich 5 (renal)                                       | 9.18  | 10.99 | 1.81 | 7.78E-18 | 1.21E-16 |
| 5348  | FXYD1    | FXYD domain containing ion transport regulator 1             | 6.69  | 8.50  | 1.81 | 1.13E-17 | 1.70E-16 |
| 26576 | SRPK3    | SRSF protein kinase 3                                        | 7.92  | 9.73  | 1.80 | 2.39E-18 | 4.03E-17 |
| 1573  | CYP2J2   | cytochrome P450, family 2, subfamily J, polypeptide 2        | 6.54  | 8.34  | 1.80 | 6.83E-20 | 1.52E-18 |
| 9209  | LRRFIP2  | leucine rich repeat (in FLII) interacting protein 2          | 6.28  | 8.09  | 1.80 | 1.61E-17 | 2.36E-16 |
| 8522  | GAS7     | growth arrest-specific 7                                     | 6.29  | 8.09  | 1.79 | 6.16E-18 | 9.80E-17 |
| 27231 | ITGB1BP3 | integrin beta 1 binding protein 3                            | 6.37  | 8.17  | 1.79 | 8.88E-17 | 1.13E-15 |
| 4779  | NFE2L1   | nuclear factor (erythroid-derived 2)-like 1                  | 9.33  | 11.11 | 1.78 | 2.86E-19 | 5.75E-18 |
| 23077 | MYCBP2   | MYC binding protein 2                                        | 7.05  | 8.83  | 1.78 | 4.47E-15 | 4.30E-14 |
| 56937 | PMEPA1   | prostate transmembrane protein, androgen induced 1           | 9.04  | 10.82 | 1.78 | 1.75E-19 | 3.64E-18 |
| 51400 | PPME1    | protein phosphatase methylesterase 1                         | 10.14 | 11.91 | 1.77 | 2.62E-17 | 3.72E-16 |
| 10464 | PIBF1    | progesterone immunomodulatory binding factor 1               | 7.00  | 8.77  | 1.77 | 7.55E-18 | 1.18E-16 |
| 29948 | OSGIN1   | oxidative stress induced growth inhibitor 1                  | 8.34  | 10.10 | 1.75 | 1.31E-13 | 9.92E-13 |
| 81603 | TRIM8    | tripartite motif containing 8                                | 10.48 | 12.24 | 1.75 | 1.20E-20 | 3.13E-19 |
| 60370 | AVP11    | arginine vasopressin-induced 1                               | 9.19  | 10.94 | 1.75 | 3.62E-18 | 5.93E-17 |
| 3898  | LAD1     | ladinin 1                                                    | 7.34  | 9.09  | 1.74 | 1.52E-17 | 2.23E-16 |

|        |         |                                                                                                                |      |       |      |          |          |
|--------|---------|----------------------------------------------------------------------------------------------------------------|------|-------|------|----------|----------|
| 98     | ACYP2   | acylphosphatase 2, muscle type                                                                                 | 8.07 | 9.81  | 1.74 | 1.54E-18 | 2.68E-17 |
| 10193  | RNF41   | ring finger protein 41                                                                                         | 8.26 | 9.99  | 1.74 | 5.03E-19 | 9.56E-18 |
| 6261   | RYR1    | ryanodine receptor 1 (skeletal)                                                                                | 8.69 | 10.42 | 1.74 | 3.76E-17 | 5.16E-16 |
| 2064   | ERBB2   | v-erb-b2 erythroblastic leukemia viral oncogene homolog 2, neuro/glioblastoma derived oncogene homolog (avian) | 8.60 | 10.33 | 1.74 | 4.42E-18 | 7.13E-17 |
| 4060   | LUM     | lumican                                                                                                        | 8.23 | 9.96  | 1.73 | 1.04E-16 | 1.31E-15 |
| 11278  | KLF12   | Kruppel-like factor 12                                                                                         | 7.23 | 8.96  | 1.72 | 4.74E-17 | 6.33E-16 |
| 221914 | GPC2    | glypican 2                                                                                                     | 9.01 | 10.72 | 1.72 | 1.42E-16 | 1.75E-15 |
| 8780   | RIOK3   | RIO kinase 3 (yeast)                                                                                           | 9.73 | 11.45 | 1.71 | 2.36E-19 | 4.81E-18 |
| 1842   | ECM2    | extracellular matrix protein 2, female organ and adipocyte specific                                            | 6.31 | 8.02  | 1.71 | 2.42E-15 | 2.43E-14 |
| 10184  | LHFPL2  | lipoma HMGIC fusion partner-like 2                                                                             | 8.55 | 10.25 | 1.70 | 1.18E-17 | 1.77E-16 |
| 6445   | SGCG    | sarcoglycan, gamma (35kDa dystrophin-associated glycoprotein)                                                  | 6.34 | 8.04  | 1.70 | 3.86E-17 | 5.28E-16 |
| 84676  | TRIM63  | tripartite motif containing 63                                                                                 | 6.83 | 8.53  | 1.70 | 6.21E-14 | 4.97E-13 |
| 55508  | SLC35E3 | solute carrier family 35, member E3                                                                            | 8.28 | 9.97  | 1.69 | 1.42E-19 | 2.99E-18 |
| 56940  | DUSP2   | dual specificity phosphatase 22                                                                                | 8.25 | 9.94  | 1.69 | 7.31E-16 | 8.00E-15 |
| 63908  | NAPB    | N-ethylmaleimide-sensitive factor attachment protein, beta                                                     | 7.62 | 9.31  | 1.69 | 1.96E-17 | 2.83E-16 |
| 23588  | KLHDC2  | kelch domain containing 2                                                                                      | 9.55 | 11.23 | 1.69 | 1.41E-16 | 1.73E-15 |
| 84561  | SLC12A8 | solute carrier family 12 (potassium/chloride transporters), member 8                                           | 6.93 | 8.62  | 1.68 | 9.70E-17 | 1.22E-15 |

|        |        |                                                                                    |       |       |      |          |          |
|--------|--------|------------------------------------------------------------------------------------|-------|-------|------|----------|----------|
| 1993   | ELAVL2 | ELAV (embryonic lethal, abnormal vision, <i>Drosophila</i> )-like 2 (Hu antigen B) | 6.50  | 8.18  | 1.68 | 1.25E-17 | 1.86E-16 |
| 10600  | USP16  | ubiquitin specific peptidase 16                                                    | 6.68  | 8.36  | 1.68 | 5.81E-17 | 7.67E-16 |
| 64397  | ZFP106 | zinc finger protein 106 homolog (mouse)                                            | 11.35 | 13.04 | 1.68 | 7.99E-14 | 6.26E-13 |
| 219771 | CCNY   | cyclin Y                                                                           | 8.82  | 10.49 | 1.67 | 9.79E-18 | 1.50E-16 |
| 53346  | TM6SF1 | transmembrane 6 superfamily member 1                                               | 6.64  | 8.31  | 1.66 | 1.64E-12 | 1.04E-11 |
| 81544  | GDPD5  | glycerophosphodiester phosphodiesterase domain containing 5                        | 7.37  | 9.04  | 1.66 | 4.21E-18 | 6.80E-17 |
| 80232  | WDR26  | WD repeat domain 26                                                                | 7.75  | 9.41  | 1.66 | 8.86E-18 | 1.37E-16 |
| 9873   | FCHSD2 | FCH and double SH3 domains 2                                                       | 7.56  | 9.21  | 1.66 | 1.68E-15 | 1.73E-14 |
| 56961  | SHD    | Src homology 2 domain containing transforming protein D                            | 9.67  | 11.32 | 1.65 | 1.03E-18 | 1.83E-17 |
| 1756   | DMD    | dystrophin                                                                         | 6.52  | 8.17  | 1.65 | 3.45E-17 | 4.79E-16 |
| 9127   | P2RX6  | purinergic receptor P2X, ligand-gated ion channel, 6                               | 7.49  | 9.13  | 1.65 | 1.00E-15 | 1.07E-14 |
| 10580  | SORBS1 | sorbin and SH3 domain containing 1                                                 | 6.66  | 8.30  | 1.64 | 5.16E-18 | 8.28E-17 |
| 57158  | JPH2   | junctionophilin 2                                                                  | 7.76  | 9.38  | 1.61 | 3.90E-15 | 3.79E-14 |
| 127495 | LRRC39 | leucine rich repeat containing 39                                                  | 6.43  | 8.03  | 1.61 | 1.42E-15 | 1.49E-14 |
| 2318   | FLNC   | filamin C, gamma                                                                   | 11.90 | 13.50 | 1.60 | 4.97E-14 | 4.02E-13 |
| 388403 | YPEL2  | yippee-like 2 ( <i>Drosophila</i> )                                                | 6.87  | 8.47  | 1.60 | 2.63E-16 | 3.07E-15 |
| 54749  | EPDR1  | ependymin related protein 1 (zebrafish)                                            | 10.17 | 11.76 | 1.59 | 3.79E-18 | 6.20E-17 |
| 274    | BIN1   | bridging integrator 1                                                              | 11.98 | 13.35 | 1.37 | 4.15E-15 | 4.01E-14 |

<sup>a</sup>RD Mean lists the mean value from three biologically independent RD RNA samples from RD cells infected with a GFP-expressing lentivirus and placed in differentiation media for 72 h.

<sup>b</sup>Myotube Mean lists the mean value from three biologically independent primary human myotube RNA samples grown to confluency and placed in differentiation media for 72 h.  
<sup>c</sup>Fold change represents the difference between the myotube and RD values and is a log<sub>2</sub> value.

**Supplemental Table S3. Upregulated myogenic genes expressed at comparable levels in RD cells.**

| Entrez ID | Symbol     | Gene Name                                                           | RD value <sup>a</sup> | Myotube value <sup>b</sup> | Fold change <sup>c</sup> | p-value  | FDR      |
|-----------|------------|---------------------------------------------------------------------|-----------------------|----------------------------|--------------------------|----------|----------|
| 3983      | ABLIM1     | actin binding LIM protein 1                                         | 8.63                  | 8.35                       | -0.29                    | 0.0123   | 0.0189   |
| 31        | ACACA      | acetyl-CoA carboxylase alpha                                        | 9.51                  | 9.28                       | -0.24                    | 0.0283   | 0.0409   |
| 116987    | AGAP1      | ArfGAP with GTPase domain, ankyrin repeat and PH domain 1           | 9.70                  | 9.58                       | -0.12                    | 0.2123   | 0.2585   |
| 204       | AK2        | adenylate kinase 2                                                  | 11.46                 | 11.94                      | 0.47                     | 1.57E-05 | 3.66E-05 |
| 57679     | ALS2       | amyotrophic lateral sclerosis 2 (juvenile)                          | 9.69                  | 9.93                       | 0.23                     | 0.0140   | 0.0212   |
| 351       | APP        | amyloid beta (A4) precursor protein                                 | 11.76                 | 10.99                      | -0.77                    | 8.31E-08 | 2.66E-07 |
| 10513     | APPBP2     | amyloid beta precursor protein (cytoplasmic tail) binding protein 2 | 9.45                  | 9.97                       | 0.52                     | 2.75E-07 | 8.15E-07 |
| 80728     | ARHGA P39  | Rho GTPase activating protein 39                                    | 8.57                  | 8.66                       | 0.10                     | 0.2463   | 0.2958   |
| 55616     | ASAP3      | ArfGAP with SH3 domain, ankyrin repeat and PH domain 3              | 9.67                  | 10.19                      | 0.52                     | 7.13E-06 | 1.74E-05 |
| 26053     | AUTS2      | autism susceptibility candidate 2                                   | 9.62                  | 10.14                      | 0.52                     | 3.20E-06 | 8.21E-06 |
| 10904     | BLCAP      | bladder cancer associated protein                                   | 11.10                 | 10.67                      | -0.43                    | 5.68E-05 | 0.0001   |
| 8019      | BRD3       | bromodomain containing 3                                            | 10.43                 | 10.49                      | 0.06                     | 0.6285   | 0.6782   |
| 119032    | C10orf32   | chromosome 10 open reading frame 32                                 | 8.94                  | 9.22                       | 0.28                     | 0.0019   | 0.0033   |
| 119710    | C11orf74   | chromosome 11 open reading frame 74                                 | 10.37                 | 10.66                      | 0.28                     | 0.0033   | 0.0056   |
| 112752    | C14orf17 9 | chromosome 14 open reading frame 179                                | 9.54                  | 9.92                       | 0.37                     | 0.0005   | 0.0009   |
| 56911     | C21orf7    | chromosome 21 open reading frame 7                                  | 12.63                 | 12.60                      | -0.02                    | 0.7984   | 0.8298   |
| 50854     | C6orf48    | chromosome 6 open reading frame 48                                  | 7.26                  | 6.97                       | -0.31                    | 0.0064   | 0.0102   |
| 157922    | CAMSA P1   | calmodulin regulated spectrin-associated protein 1                  | 8.86                  | 9.39                       | 0.53                     | 9.25E-07 | 2.56E-06 |

|        |         |                                                                |       |       |       |          |          |
|--------|---------|----------------------------------------------------------------|-------|-------|-------|----------|----------|
| 54897  | CASZ1   | castor zinc finger 1                                           | 6.91  | 7.46  | 0.56  | 7.10E-07 | 1.99E-06 |
| 868    | CBLB    | Cas-Br-M (murine) ecotropic retroviral transforming sequence b | 9.90  | 10.05 | 0.14  | 0.2172   | 0.2639   |
| 875    | CBS     | cystathionine-beta-synthase                                    | 9.97  | 10.32 | 0.36  | 0.0038   | 0.0062   |
| 29903  | CCDC106 | coiled-coil domain containing 106                              | 9.11  | 9.45  | 0.34  | 0.0018   | 0.0031   |
| 83643  | CCDC3   | coiled-coil domain containing 3                                | 9.76  | 9.37  | -0.39 | 0.0005   | 0.0010   |
| 8555   | CDC14B  | CDC14 cell division cycle 14 homolog B (S. cerevisiae)         | 8.82  | 9.16  | 0.33  | 0.0016   | 0.0028   |
| 400916 | CHCHD10 | coiled-coil-helix-coiled-coil-helix domain containing 10       | 10.59 | 10.99 | 0.39  | 8.76E-05 | 0.0002   |
| 1108   | CHD4    | chromodomain helicase DNA binding protein 4                    | 10.11 | 9.93  | -0.18 | 0.0678   | 0.0914   |
| 80205  | CHD9    | chromodomain helicase DNA binding protein 9                    | 10.38 | 10.14 | -0.24 | 0.0794   | 0.1057   |
| 1134   | CHRNA1  | cholinergic receptor, nicotinic, alpha 1 (muscle)              | 13.16 | 12.67 | -0.48 | 1.92E-05 | 4.44E-05 |
| 23332  | CLASP1  | cytoplasmic linker associated protein 1                        | 9.42  | 9.55  | 0.13  | 0.1733   | 0.2152   |
| 1185   | CLCN6   | chloride channel 6                                             | 8.42  | 8.66  | 0.22  | 0.0612   | 0.0833   |
| 80790  | CMIP    | c-Maf-inducing protein                                         | 11.05 | 11.21 | 0.17  | 0.0584   | 0.0797   |
| 1307   | COL16A1 | collagen, type XVI, alpha 1                                    | 9.82  | 9.84  | 0.02  | 0.8152   | 0.8436   |
| 404217 | CTXN1   | cortexin 1                                                     | 10.08 | 10.61 | 0.53  | 2.75E-06 | 7.10E-06 |
| 1523   | CUX1    | cut-like homeobox 1                                            | 8.48  | 8.78  | 0.30  | 0.0162   | 0.0245   |
| 51523  | CXXC5   | CXXC finger protein 5                                          | 12.43 | 13.21 | 0.77  | 2.48E-09 | 9.86E-09 |
| 147906 | DACT3   | dapper, antagonist of beta-catenin, homolog 3 (Xenopus laevis) | 8.68  | 8.34  | -0.35 | 0.0025   | 0.0043   |
| 1605   | DAG1    | dystroglycan 1 (dystrophin-associated glycoprotein 1)          | 11.09 | 10.74 | -0.34 | 0.0006   | 0.0010   |
| 1612   | DAPK1   | death-associated protein kinase 1                              | 9.04  | 8.57  | -0.47 | 3.02E-05 | 6.80E-05 |



|        |             |                                                                            |       |       |       |              |              |
|--------|-------------|----------------------------------------------------------------------------|-------|-------|-------|--------------|--------------|
| 79007  | DBNDD<br>1  | dysbindin<br>(dystrobrevin binding<br>protein 1) domain<br>containing 1    | 10.83 | 10.36 | -0.48 | 7.80E-<br>06 | 1.89E-<br>05 |
| 1629   | DBT         | dihydrolipoamide<br>branched chain<br>transacylase E2                      | 9.72  | 10.20 | 0.48  | 4.77E-<br>06 | 1.20E-<br>05 |
| 167227 | DCP2        | DCP2 decapping<br>enzyme homolog (S.<br>cerevisiae)                        | 9.76  | 9.91  | 0.15  | 0.1720       | 0.2138       |
| 160518 | DENND<br>5B | DENN/MADD<br>domain containing 5B                                          | 8.36  | 8.69  | 0.33  | 0.0024       | 0.0041       |
| 8527   | DGKD        | diacylglycerol kinase,<br>delta 130kDa                                     | 8.85  | 8.64  | -0.22 | 0.0263       | 0.0382       |
| 57609  | DIP2B       | DIP2 disco-interacting<br>protein 2 homolog B<br>(Drosophila)              | 9.12  | 9.23  | 0.11  | 0.3241       | 0.3783       |
| 28514  | DLL1        | delta-like 1<br>(Drosophila)                                               | 9.00  | 9.56  | 0.56  | 9.42E-<br>06 | 2.26E-<br>05 |
| 285193 | DUSP28      | dual specificity<br>phosphatase 28                                         | 9.30  | 9.59  | 0.29  | 0.0034       | 0.0057       |
| 23644  | EDC4        | enhancer of mRNA<br>decapping 4                                            | 9.85  | 10.19 | 0.35  | 0.0015       | 0.0027       |
| 2065   | ERBB3       | v-erb-b2 erythroblastic<br>leukemia viral<br>oncogene homolog 3<br>(avian) | 6.98  | 7.57  | 0.59  | 1.54E-<br>07 | 4.75E-<br>07 |
| 51466  | EVL         | Enah/Vasp-like                                                             | 11.67 | 11.57 | -0.10 | 0.2122       | 0.2584       |
| 3992   | FADS1       | fatty acid desaturase 1                                                    | 10.36 | 10.81 | 0.45  | 0.0008       | 0.0014       |
| 9750   | FAM65B      | family with sequence<br>similarity 65, member<br>B                         | 8.46  | 8.94  | 0.48  | 0.0002       | 0.0003       |
| 2222   | FDFT1       | farnesyl-diphosphate<br>farnesyltransferase 1                              | 10.07 | 10.34 | 0.26  | 0.0221       | 0.0325       |
| 23048  | FNBP1       | formin binding protein<br>1                                                | 10.08 | 10.19 | 0.10  | 0.3056       | 0.3586       |
| 252995 | FNDC5       | fibronectin type III<br>domain containing 5                                | 12.44 | 11.99 | -0.47 | 0.0005       | 0.0009       |
| 96459  | FNIP1       | folliculin interacting<br>protein 1                                        | 8.58  | 9.14  | 0.57  | 2.45E-<br>06 | 6.39E-<br>06 |
| 221937 | FOXK1       | forkhead box K1                                                            | 9.49  | 9.81  | 0.32  | 0.0114       | 0.0175       |
| 4303   | FOXO4       | forkhead box O4                                                            | 9.31  | 9.41  | 0.10  | 0.3171       | 0.3708       |
| 8087   | FXR1        | fragile X mental<br>retardation, autosomal<br>homolog 1                    | 10.74 | 12.27 | 1.51  | 5.41E-<br>16 | 6.06E-<br>15 |
| 10912  | GADD45      | growth arrest and                                                          | 9.37  | 9.56  | 0.19  | 0.0927       | 0.1216       |

|        |           |                                                                             |       |       |       |          |          |
|--------|-----------|-----------------------------------------------------------------------------|-------|-------|-------|----------|----------|
|        | G         | DNA-damage-inducible, gamma                                                 |       |       |       |          |          |
| 352954 | GATS      | GATS, stromal antigen 3 opposite strand                                     | 9.03  | 8.60  | -0.43 | 2.18E-05 | 5.02E-05 |
| 23062  | GGA2      | golgi-associated, gamma adaptin ear containing, ARF binding protein 2       | 9.08  | 8.83  | -0.24 | 0.0098   | 0.0153   |
| 2805   | GOT1      | glutamic-oxaloacetic transaminase 1, soluble (aspartate aminotransferase 1) | 10.56 | 11.09 | 0.54  | 7.16E-06 | 1.75E-05 |
| 84706  | GPT2      | glutamic pyruvate transaminase (alanine aminotransferase) 2                 | 10.23 | 10.45 | 0.21  | 0.1100   | 0.1422   |
| 3017   | HIST1H2BD | histone cluster 1, H2bd                                                     | 8.13  | 7.50  | -0.63 | 1.67E-06 | 4.46E-06 |
| 3125   | HLA-DRB3  | major histocompatibility complex, class II, DR beta 3                       | 9.70  | 9.34  | -0.36 | 0.0012   | 0.0021   |
| 3157   | HMGCS1    | 3-hydroxy-3-methylglutaryl-CoA synthase 1 (soluble)                         | 10.96 | 11.47 | 0.51  | 0.0094   | 0.0146   |
| 3376   | IARS      | isoleucyl-tRNA synthetase                                                   | 10.99 | 11.26 | 0.27  | 0.0187   | 0.0279   |
| 57722  | IGDCC4    | immunoglobulin superfamily, DCC subclass, member 4                          | 8.18  | 7.99  | -0.18 | 0.0841   | 0.1113   |
| 27190  | IL17B     | interleukin 17B                                                             | 7.63  | 7.95  | 0.32  | 0.0072   | 0.0114   |
| 3636   | INPPL1    | inositol polyphosphate phosphatase-like 1                                   | 10.71 | 11.12 | 0.40  | 0.0004   | 0.0007   |
| 3689   | ITGB2     | integrin, beta 2 (complement component 3 receptor 3 and 4 subunit)          | 9.52  | 9.22  | -0.30 | 0.0199   | 0.0295   |
| 3720   | JARID2    | jumonji, AT rich interactive domain 2                                       | 8.86  | 9.13  | 0.26  | 0.0043   | 0.0071   |
| 56704  | JPH1      | junctophilin 1                                                              | 8.43  | 8.15  | -0.28 | 0.0059   | 0.0095   |
| 10324  | KBTBD10   | kelch repeat and BTB (POZ) domain containing 10                             | 10.99 | 12.22 | 1.23  | 4.24E-14 | 3.48E-13 |
| 10765  | KDM5B     | lysine (K)-specific demethylase 5B                                          | 9.83  | 9.80  | -0.03 | 0.7966   | 0.8283   |
| 23095  | KIF1B     | kinesin family                                                              | 8.22  | 10.71 | 2.50  | 2.91E-   | 7.00E-   |

|        |            | member 1B                                              |       |       |       | 20       | 19       |
|--------|------------|--------------------------------------------------------|-------|-------|-------|----------|----------|
| 51621  | KLF13      | Kruppel-like factor 13                                 | 9.58  | 9.93  | 0.34  | 0.0043   | 0.0071   |
| 116138 | KLHDC3     | kelch domain containing 3                              | 11.66 | 12.05 | 0.40  | 6.48E-05 | 0.0001   |
| 79412  | KREME N2   | kringle containing transmembrane protein 2             | 8.99  | 9.18  | 0.19  | 0.0921   | 0.1209   |
| 3908   | LAMA2      | laminin, alpha 2                                       | 8.35  | 9.10  | 0.75  | 3.65E-08 | 1.23E-07 |
| 3911   | LAMA5      | laminin, alpha 5                                       | 11.42 | 11.19 | -0.22 | 0.0449   | 0.0627   |
| 9215   | LARGE      | like-glycosyltransferase                               | 8.91  | 8.20  | -0.72 | 8.04E-06 | 1.95E-05 |
| 253782 | LASS6      | LAG1 homolog, ceramide synthase 6                      | 10.83 | 10.56 | -0.28 | 0.0171   | 0.0257   |
| 29995  | LMCD1      | LIM and cysteine-rich domains 1                        | 10.23 | 10.10 | -0.13 | 0.2141   | 0.2605   |
| 9361   | LONP1      | lon peptidase 1, mitochondrial                         | 10.44 | 10.43 | -0.01 | 0.9353   | 0.9467   |
| 26018  | LRIG1      | leucine-rich repeats and immunoglobulin-like domains 1 | 8.85  | 7.95  | -0.89 | 2.35E-11 | 1.25E-10 |
| 55227  | LRRC1      | leucine rich repeat containing 1                       | 8.90  | 9.07  | 0.17  | 0.0919   | 0.1207   |
| 28992  | MACRO D1   | MACRO domain containing 1                              | 9.15  | 9.37  | 0.22  | 0.0216   | 0.0318   |
| 84557  | MAP1L C3A  | microtubule-associated protein 1 light chain 3 alpha   | 11.66 | 11.35 | -0.30 | 0.0017   | 0.0030   |
| 4155   | MBP        | myelin basic protein                                   | 6.93  | 7.19  | 0.27  | 0.0235   | 0.0344   |
| 389538 | MGC72080   | MGC72080 pseudogene                                    | 8.80  | 9.15  | 0.35  | 0.0013   | 0.0024   |
| 64112  | MOAP1      | modulator of apoptosis 1                               | 9.28  | 9.58  | 0.31  | 0.0010   | 0.0019   |
| 9242   | MSC        | musculin                                               | 9.74  | 9.79  | 0.07  | 0.5400   | 0.5950   |
| 84939  | MUM1       | melanoma associated antigen (mutated) 1                | 10.38 | 10.14 | -0.25 | 0.0126   | 0.0192   |
| 4684   | NCAM1      | neural cell adhesion molecule 1                        | 7.24  | 8.70  | 1.46  | 4.01E-14 | 3.30E-13 |
| 8648   | NCOA1      | nuclear receptor coactivator 1                         | 9.68  | 9.79  | 0.12  | 0.1937   | 0.2378   |
| 114915 | NCRNA00219 | non-protein coding RNA 219                             | 10.90 | 10.68 | -0.22 | 0.0201   | 0.0298   |
| 441951 | NCRNA00275 | non-protein coding RNA 275                             | 13.05 | 12.91 | -0.14 | 0.0927   | 0.1217   |
| 63941  | NECAB3     | N-terminal EF-hand calcium binding                     | 8.12  | 8.24  | 0.11  | 0.3892   | 0.4458   |

|               |             |                                                                                                             |       |       |       |              |              |  |
|---------------|-------------|-------------------------------------------------------------------------------------------------------------|-------|-------|-------|--------------|--------------|--|
|               |             | protein 3                                                                                                   |       |       |       |              |              |  |
| 4854          | NOTCH<br>3  | notch 3                                                                                                     | 9.46  | 9.26  | -0.20 | 0.0332       | 0.0475       |  |
| 10577         | NPC2        | Niemann-Pick disease,<br>type C2                                                                            | 12.46 | 12.48 | 0.03  | 0.7746       | 0.8085       |  |
| 55714         | ODZ3        | odz, odd Oz/ten-m<br>homolog 3<br>(Drosophila)                                                              | 10.91 | 10.74 | -0.17 | 0.1366       | 0.1734       |  |
| 114876        | OSBPL1<br>A | oxysterol binding<br>protein-like 1A                                                                        | 9.22  | 9.73  | 0.51  | 2.42E-<br>06 | 6.31E-<br>06 |  |
| 54510         | PCDH18      | protocadherin 18                                                                                            | 8.34  | 8.86  | 0.52  | 9.95E-<br>05 | 0.0002       |  |
| 5108          | PCM1        | pericentriolar material<br>1                                                                                | 9.57  | 10.15 | 0.58  | 1.96E-<br>06 | 5.16E-<br>06 |  |
| 79605         | PGBD5       | piggyBac transposable<br>element derived 5                                                                  | 8.55  | 8.93  | 0.38  | 0.0013       | 0.0023       |  |
| 26227         | PHGDH       | phosphoglycerate<br>dehydrogenase                                                                           | 13.12 | 12.95 | -0.17 | 0.0848       | 0.1121       |  |
| 8544          | PIR         | pirin (iron-binding<br>nuclear protein)                                                                     | 8.42  | 9.12  | 0.70  | 7.48E-<br>08 | 2.41E-<br>07 |  |
| 91461         | PKDCC       | protein kinase domain<br>containing,<br>cytoplasmic homolog<br>(mouse)                                      | 8.44  | 7.63  | -0.81 | 2.03E-<br>09 | 8.19E-<br>09 |  |
| 63876         | PKNOX<br>2  | PBX/knotted 1<br>homeobox 2                                                                                 | 9.63  | 9.24  | -0.39 | 0.0002       | 0.0004       |  |
| 11145         | PLA2G1<br>6 | phospholipase A2,<br>group XVI                                                                              | 7.14  | 7.71  | 0.57  | 5.34E-<br>05 | 0.0001       |  |
| 59338         | PLEKH<br>A1 | pleckstrin homology<br>domain containing,<br>family A<br>(phosphoinositide<br>binding specific)<br>member 1 | 8.70  | 9.42  | 0.72  | 2.62E-<br>09 | 1.04E-<br>08 |  |
| 55228         | PNMAL<br>1  | PNMA-like 1                                                                                                 | 9.48  | 9.84  | 0.36  | 0.0010       | 0.0019       |  |
| 9581          | PREPL       | prolyl endopeptidase-<br>like                                                                               | 8.05  | 8.73  | 0.67  | 1.82E-<br>05 | 4.21E-<br>05 |  |
| 29968         | PSAT1       | phosphoserine<br>aminotransferase 1                                                                         | 10.99 | 11.18 | 0.21  | 0.1722       | 0.2141       |  |
| 9771          | RAPGEF<br>5 | Rap guanine<br>nucleotide exchange<br>factor (GEF) 5                                                        | 7.93  | 8.09  | 0.16  | 0.1870       | 0.2304       |  |
| 768211        | RELL1       | RELT-like 1                                                                                                 | 9.87  | 10.42 | 0.56  | 3.04E-<br>05 | 6.84E-<br>05 |  |
| 100008<br>589 | RN28S1      | RNA, 28S ribosomal 1                                                                                        | 11.51 | 10.89 | -0.62 | 2.58E-<br>05 | 5.87E-<br>05 |  |

|        |          |                                                                                             |       |       |       |          |          |
|--------|----------|---------------------------------------------------------------------------------------------|-------|-------|-------|----------|----------|
| 125050 | RN7SK    | RNA, 7SK small nuclear                                                                      | 6.65  | 7.38  | 0.72  | 1.02E-07 | 3.21E-07 |
| 7844   | RNF103   | ring finger protein 103                                                                     | 9.58  | 9.83  | 0.24  | 0.0255   | 0.0371   |
| 84268  | RPAIN    | RPA interacting protein                                                                     | 10.59 | 11.10 | 0.51  | 4.94E-06 | 1.23E-05 |
| 6167   | RPL37    | ribosomal protein L37                                                                       | 7.16  | 6.87  | -0.30 | 0.0032   | 0.0053   |
| 58528  | RRAGD    | Ras-related GTP binding D                                                                   | 9.89  | 9.78  | -0.11 | 0.3111   | 0.3645   |
| 23513  | SCRIB    | scribbled homolog (Drosophila)                                                              | 9.79  | 10.34 | 0.55  | 5.58E-07 | 1.59E-06 |
| 10500  | SEMA6C   | sema domain, transmembrane domain (TM), and cytoplasmic domain, (semaphorin) 6C             | 8.59  | 8.49  | -0.10 | 0.3651   | 0.4208   |
| 5413   | SEPT5    | septin 5                                                                                    | 11.34 | 11.39 | 0.05  | 0.6564   | 0.7034   |
| 6442   | SGCA     | sarcoglycan, alpha (50kDa dystrophin-associated glycoprotein)                               | 10.62 | 10.83 | 0.20  | 0.0511   | 0.0706   |
| 6444   | SGCD     | sarcoglycan, delta (35kDa dystrophin-associated glycoprotein)                               | 7.95  | 9.98  | 2.03  | 3.74E-15 | 3.65E-14 |
| 9644   | SH3PXD2A | SH3 and PX domains 2A                                                                       | 11.34 | 11.33 | -0.02 | 0.8446   | 0.8688   |
| 22933  | SIRT2    | sirtuin 2                                                                                   | 8.37  | 8.63  | 0.25  | 0.0411   | 0.0577   |
| 51804  | SIX4     | SIX homeobox 4                                                                              | 10.29 | 9.78  | -0.50 | 1.60E-06 | 4.27E-06 |
| 291    | SLC25A4  | solute carrier family 25 (mitochondrial carrier; adenine nucleotide translocator), member 4 | 10.63 | 11.08 | 0.45  | 8.34E-05 | 0.0002   |
| 150572 | SMYD1    | SET and MYND domain containing 1                                                            | 10.31 | 10.60 | 0.29  | 0.0163   | 0.0245   |
| 26010  | SPATS2L  | spermatogenesis associated, serine-rich 2-like                                              | 12.37 | 12.54 | 0.18  | 0.0711   | 0.0954   |
| 10253  | SPRY2    | sprouty homolog 2 (Drosophila)                                                              | 10.82 | 10.64 | -0.18 | 0.0997   | 0.1300   |
| 23380  | SRGAP2   | SLIT-ROBO Rho GTPase activating protein 2                                                   | 8.32  | 8.06  | -0.25 | 0.0194   | 0.0289   |
| 6774   | STAT3    | signal transducer and                                                                       | 9.62  | 9.67  | 0.06  | 0.5753   | 0.6289   |

|        |          |                                                                       |       |       |       |          |          |
|--------|----------|-----------------------------------------------------------------------|-------|-------|-------|----------|----------|
|        |          | activator of transcription 3 (acute-phase response factor)            |       |       |       |          |          |
| 10147  | SUGP2    | SURP and G patch domain containing 2                                  | 9.94  | 10.15 | 0.22  | 0.0179   | 0.0268   |
| 85461  | TANC1    | tetratricopeptide repeat, ankyrin repeat and coiled-coil containing 1 | 8.96  | 8.88  | -0.07 | 0.4673   | 0.5245   |
| 6913   | TBX15    | T-box 15                                                              | 9.25  | 8.85  | -0.40 | 0.0008   | 0.0014   |
| 6938   | TCF12    | transcription factor 12                                               | 9.34  | 9.66  | 0.32  | 0.0030   | 0.0050   |
| 7043   | TGFB3    | transforming growth factor, beta 3                                    | 8.34  | 8.24  | -0.11 | 0.2356   | 0.2841   |
| 7058   | THBS2    | thrombospondin 2                                                      | 8.16  | 8.44  | 0.28  | 0.0040   | 0.0066   |
| 7078   | TIMP3    | TIMP metalloproteinase inhibitor 3                                    | 10.03 | 10.27 | 0.22  | 0.1623   | 0.2028   |
| 54972  | TMEM132A | transmembrane protein 132A                                            | 9.71  | 9.70  | 0.01  | 0.9502   | 0.9596   |
| 374882 | TMEM205  | transmembrane protein 205                                             | 11.41 | 10.95 | -0.46 | 2.07E-05 | 4.75E-05 |
| 55151  | TMEM38B  | transmembrane protein 38B                                             | 8.98  | 8.98  | 0.00  | 0.9790   | 0.9830   |
| 27242  | TNFRSF21 | tumor necrosis factor receptor superfamily, member 21                 | 10.57 | 10.30 | -0.27 | 0.0055   | 0.0089   |
| 10188  | TNK2     | tyrosine kinase, non-receptor, 2                                      | 10.46 | 11.01 | 0.56  | 1.23E-06 | 3.35E-06 |
| 7136   | TNNI2    | troponin I type 2 (skeletal, fast)                                    | 8.41  | 8.79  | 0.38  | 0.0015   | 0.0027   |
| 23112  | TNRC6B   | trinucleotide repeat containing 6B                                    | 9.01  | 9.10  | 0.09  | 0.5619   | 0.6161   |
| 10043  | TOM1     | target of myb1 (chicken)                                              | 9.85  | 10.35 | 0.51  | 6.37E-06 | 1.57E-05 |
| 7158   | TP53BP1  | tumor protein p53 binding protein 1                                   | 9.42  | 9.89  | 0.47  | 3.38E-05 | 7.56E-05 |
| 79090  | TRAPPC6A | trafficking protein particle complex 6A                               | 8.59  | 9.15  | 0.57  | 7.02E-06 | 1.72E-05 |
| 83707  | TRPT1    | tRNA phosphotransferase 1                                             | 10.83 | 10.80 | -0.05 | 0.5442   | 0.5990   |
| 56995  | TULP4    | tubby like protein 4                                                  | 9.72  | 10.05 | 0.33  | 0.0170   | 0.0255   |
| 10628  | TXNIP    | thioredoxin interacting protein                                       | 12.25 | 12.11 | -0.16 | 0.1428   | 0.1805   |
| 23352  | UBR4     | ubiquitin protein ligase E3 component n-recognin 4                    | 8.96  | 9.12  | 0.16  | 0.2148   | 0.2614   |

|        |        |                                         |       |       |       |        |        |
|--------|--------|-----------------------------------------|-------|-------|-------|--------|--------|
| 245806 | VGLL2  | vestigial like 2<br>(Drosophila)        | 10.34 | 10.20 | -0.14 | 0.3010 | 0.3537 |
| 65249  | ZSWIM4 | zinc finger, SWIM-<br>type containing 4 | 9.63  | 9.32  | -0.31 | 0.0047 | 0.0077 |

<sup>a</sup>RD value lists the mean value from three biologically independent RD RNA samples from RD cells infected with a GFP-expressing lentivirus and placed in differentiation media for 72 h.

<sup>b</sup>Myotube value lists the mean value from three biologically independent primary human myotube RNA samples grown to confluency and placed in differentiation media for 72 h.

<sup>c</sup>Fold change represents the difference between the myotube and RD values and is a log<sub>2</sub> value.

**Supplemental Table S4. Downregulated myogenic genes that are expressed at higher levels in RD cells.**

| Entrez ID | Symbol   | Gene Name                                              | RD value <sup>a</sup> | Myotube value <sup>b</sup> | Fold change <sup>c</sup> | p-value      | FDR          |
|-----------|----------|--------------------------------------------------------|-----------------------|----------------------------|--------------------------|--------------|--------------|
| 11065     | UBE2C    | ubiquitin-conjugating enzyme E2C                       | 12.45                 | 6.58                       | -5.86                    | 4.71<br>E-34 | 3.33<br>E-31 |
| 9768      | KIAA0101 | KIAA0101                                               | 12.07                 | 6.46                       | -5.61                    | 3.20<br>E-36 | 3.53<br>E-33 |
| 991       | CDC20    | cell division cycle 20 homolog (S. cerevisiae)         | 12.04                 | 6.62                       | -5.41                    | 7.24<br>E-34 | 4.74<br>E-31 |
| 26002     | MOXD1    | monooxygenase, DBH-like 1                              | 11.43                 | 6.68                       | -4.75                    | 3.45<br>E-31 | 1.03<br>E-28 |
| 7153      | TOP2A    | topoisomerase (DNA) II alpha 170kDa                    | 11.12                 | 6.47                       | -4.64                    | 1.50<br>E-31 | 5.01<br>E-29 |
| 9212      | AURKB    | aurora kinase B                                        | 10.52                 | 6.40                       | -4.13                    | 4.76<br>E-30 | 1.12<br>E-27 |
| 51203     | NUSAP1   | nucleolar and spindle associated protein 1             | 10.60                 | 6.57                       | -4.02                    | 2.20<br>E-29 | 4.36<br>E-27 |
| 51659     | GIN52    | GIN5 complex subunit 2 (Psf2 homolog)                  | 11.60                 | 7.60                       | -4.01                    | 2.14<br>E-31 | 6.86<br>E-29 |
| 11013     | TMSB15A  | thymosin beta 15a                                      | 11.50                 | 7.50                       | -3.99                    | 9.27<br>E-28 | 1.18<br>E-25 |
| 81848     | SPRY4    | sprouty homolog 4 (Drosophila)                         | 11.65                 | 7.72                       | -3.93                    | 6.35<br>E-30 | 1.42<br>E-27 |
| 1164      | CKS2     | CDC28 protein kinase regulatory subunit 2              | 11.88                 | 8.00                       | -3.89                    | 7.03<br>E-31 | 1.94<br>E-28 |
| 3833      | KIFC1    | kinesin family member C1                               | 10.27                 | 6.44                       | -3.82                    | 5.10<br>E-29 | 9.29<br>E-27 |
| 113130    | CDCA5    | cell division cycle associated 5                       | 10.66                 | 6.96                       | -3.70                    | 1.35<br>E-28 | 2.23<br>E-26 |
| 29028     | ATAD2    | ATPase family, AAA domain containing 2                 | 10.33                 | 6.71                       | -3.62                    | 4.50<br>E-28 | 6.14<br>E-26 |
| 9232      | PTTG1    | pituitary tumor-transforming 1                         | 11.98                 | 8.37                       | -3.60                    | 1.76<br>E-27 | 2.06<br>E-25 |
| 22974     | TPX2     | TPX2, microtubule-associated, homolog (Xenopus laevis) | 10.36                 | 6.79                       | -3.57                    | 6.94<br>E-28 | 9.01<br>E-26 |
| 10112     | KIF20A   | kinesin family member 20A                              | 10.20                 | 6.66                       | -3.54                    | 7.76<br>E-27 | 7.78<br>E-25 |
| 1870      | E2F2     | E2F transcription factor 2                             | 10.26                 | 6.74                       | -3.51                    | 1.33<br>E-28 | 2.22<br>E-26 |
| 9133      | CCNB2    | cyclin B2                                              | 10.14                 | 6.62                       | -3.51                    | 2.37<br>E-28 | 3.55<br>E-26 |
| 81620     | CDT1     | chromatin licensing and DNA replication factor 1       | 9.88                  | 6.38                       | -3.50                    | 4.91<br>E-27 | 5.16<br>E-25 |



|        |              |                                                                              |       |      |       |              |              |
|--------|--------------|------------------------------------------------------------------------------|-------|------|-------|--------------|--------------|
| 332    | BIRC5        | baculoviral IAP repeat containing 5                                          | 10.23 | 6.77 | -3.47 | 3.96<br>E-28 | 5.59<br>E-26 |
| 55355  | HJURP        | Holliday junction recognition protein                                        | 9.98  | 6.51 | -3.46 | 5.68<br>E-27 | 5.93<br>E-25 |
| 55143  | CDCA8        | cell division cycle associated 8                                             | 10.07 | 6.72 | -3.36 | 5.19<br>E-24 | 2.66<br>E-22 |
| 50861  | STMN3        | stathmin-like 3                                                              | 11.89 | 8.61 | -3.29 | 3.98<br>E-26 | 3.18<br>E-24 |
| 6001   | RGS10        | regulator of G-protein signaling 10                                          | 11.04 | 7.76 | -3.28 | 2.21<br>E-26 | 1.94<br>E-24 |
| 6502   | SKP2         | S-phase kinase-associated protein 2 (p45)                                    | 9.96  | 6.69 | -3.26 | 2.39<br>E-26 | 2.06<br>E-24 |
| 89958  | C9orf14<br>0 | chromosome 9 open reading frame 140                                          | 9.87  | 6.60 | -3.26 | 5.71<br>E-23 | 2.35<br>E-21 |
| 83879  | CDCA7        | cell division cycle associated 7                                             | 10.50 | 7.28 | -3.23 | 1.62<br>E-26 | 1.49<br>E-24 |
| 84058  | WDR54        | WD repeat domain 54                                                          | 11.94 | 8.75 | -3.20 | 1.59<br>E-24 | 8.99<br>E-23 |
| 6790   | AURKA        | aurora kinase A                                                              | 10.68 | 7.52 | -3.17 | 9.41<br>E-27 | 9.23<br>E-25 |
| 147841 | SPC24        | SPC24, NDC80 kinetochore complex component, homolog ( <i>S. cerevisiae</i> ) | 10.08 | 6.94 | -3.15 | 1.41<br>E-26 | 1.33<br>E-24 |
| 150468 | CKAP2<br>L   | cytoskeleton associated protein 2-like                                       | 9.45  | 6.32 | -3.14 | 4.43<br>E-28 | 6.12<br>E-26 |
| 54478  | FAM64<br>A   | family with sequence similarity 64, member A                                 | 9.89  | 6.76 | -3.12 | 3.58<br>E-25 | 2.31<br>E-23 |
| 79019  | CENPM        | centromere protein M                                                         | 9.56  | 6.45 | -3.11 | 2.22<br>E-26 | 1.94<br>E-24 |
| 11004  | KIF2C        | kinesin family member 2C                                                     | 9.76  | 6.71 | -3.04 | 2.22<br>E-25 | 1.49<br>E-23 |
| 64151  | NCAPG        | non-SMC condensin I complex, subunit G                                       | 9.40  | 6.37 | -3.04 | 2.64<br>E-26 | 2.24<br>E-24 |
| 7298   | TYMS         | thymidylate synthetase                                                       | 11.09 | 8.07 | -3.01 | 8.31<br>E-24 | 4.05<br>E-22 |
| 8318   | CDC45        | cell division cycle 45 homolog ( <i>S. cerevisiae</i> )                      | 9.44  | 6.43 | -3.00 | 2.38<br>E-25 | 1.59<br>E-23 |
| 5871   | MAP4K<br>2   | mitogen-activated protein kinase kinase kinase 2                             | 10.47 | 7.49 | -2.98 | 9.96<br>E-26 | 7.24<br>E-24 |
| 116028 | C16orf7<br>5 | chromosome 16 open reading frame 75                                          | 9.91  | 6.94 | -2.98 | 1.48<br>E-25 | 1.02<br>E-23 |
| 9055   | PRC1         | protein regulator of cytokinesis 1                                           | 10.27 | 7.29 | -2.98 | 3.23<br>E-26 | 2.64<br>E-24 |

|       |            |                                                                   |       |       |       |              |              |
|-------|------------|-------------------------------------------------------------------|-------|-------|-------|--------------|--------------|
| 9787  | DLGAP<br>5 | discs, large (Drosophila)<br>homolog-associated<br>protein 5      | 9.48  | 6.54  | -2.93 | 5.08<br>E-26 | 3.97<br>E-24 |
| 81610 | FAM83<br>D | family with sequence<br>similarity 83, member D                   | 9.27  | 6.36  | -2.92 | 1.20<br>E-24 | 6.97<br>E-23 |
| 26255 | PTTG3P     | pituitary tumor-<br>transforming 3<br>(pseudogene)                | 10.40 | 7.48  | -2.91 | 2.95<br>E-24 | 1.59<br>E-22 |
| 84823 | LMNB2      | lamin B2                                                          | 11.68 | 8.77  | -2.91 | 1.08<br>E-25 | 7.79<br>E-24 |
| 896   | CCND3      | cyclin D3                                                         | 13.11 | 10.24 | -2.87 | 1.97<br>E-26 | 1.77<br>E-24 |
| 4521  | NUDT1      | nudix (nucleoside<br>diphosphate linked<br>moiety X)-type motif 1 | 11.22 | 8.40  | -2.82 | 1.16<br>E-24 | 6.80<br>E-23 |
| 993   | CDC25<br>A | cell division cycle 25<br>homolog A (S. pombe)                    | 9.17  | 6.41  | -2.76 | 6.09<br>E-23 | 2.49<br>E-21 |
| 899   | CCNF       | cyclin F                                                          | 10.23 | 7.47  | -2.76 | 2.13<br>E-24 | 1.19<br>E-22 |
| 4885  | NPTX2      | neuronal pentraxin II                                             | 11.72 | 8.97  | -2.74 | 2.82<br>E-23 | 1.21<br>E-21 |
| 699   | BUB1       | budding uninhibited by<br>benzimidazoles 1<br>homolog (yeast)     | 9.02  | 6.30  | -2.73 | 2.23<br>E-24 | 1.24<br>E-22 |
| 1163  | CKS1B      | CDC28 protein kinase<br>regulatory subunit 1B                     | 11.87 | 9.16  | -2.72 | 4.77<br>E-25 | 2.99<br>E-23 |
| 1535  | CYBA       | cytochrome b-245, alpha<br>polypeptide                            | 10.33 | 7.62  | -2.72 | 7.03<br>E-23 | 2.84<br>E-21 |
| 11339 | OIP5       | Opa interacting protein 5                                         | 9.29  | 6.57  | -2.71 | 9.81<br>E-25 | 5.85<br>E-23 |
| 3065  | HDAC1      | histone deacetylase 1                                             | 12.37 | 9.72  | -2.66 | 8.78<br>E-25 | 5.26<br>E-23 |
| 890   | CCNA2      | cyclin A2                                                         | 9.77  | 7.13  | -2.63 | 1.51<br>E-24 | 8.60<br>E-23 |
| 9319  | TRIP13     | thyroid hormone receptor<br>interactor 13                         | 9.83  | 7.21  | -2.62 | 1.30<br>E-23 | 6.07<br>E-22 |
| 4085  | MAD2L<br>1 | MAD2 mitotic arrest<br>deficient-like 1 (yeast)                   | 9.54  | 6.94  | -2.61 | 1.44<br>E-23 | 6.66<br>E-22 |
| 3832  | KIF11      | kinesin family member<br>11                                       | 9.08  | 6.47  | -2.60 | 6.97<br>E-24 | 3.49<br>E-22 |
| 55872 | PBK        | PDZ binding kinase                                                | 8.89  | 6.31  | -2.59 | 8.21<br>E-23 | 3.25<br>E-21 |
| 9833  | MELK       | maternal embryonic<br>leucine zipper kinase                       | 9.75  | 7.16  | -2.59 | 4.85<br>E-23 | 2.02<br>E-21 |
| 55723 | ASF1B      | ASF1 anti-silencing<br>function 1 homolog B (S.                   | 9.33  | 6.76  | -2.58 | 2.45<br>E-23 | 1.08<br>E-21 |

|        |           |                                                                          |       |       |       |              |              |
|--------|-----------|--------------------------------------------------------------------------|-------|-------|-------|--------------|--------------|
|        |           | cerevisiae)                                                              |       |       |       |              |              |
| 10733  | PLK4      | polo-like kinase 4                                                       | 9.12  | 6.55  | -2.56 | 5.15<br>E-23 | 2.13<br>E-21 |
| 259266 | ASPM      | asp (abnormal spindle) homolog, microcephaly associated (Drosophila)     | 9.36  | 6.81  | -2.56 | 4.44<br>E-22 | 1.54<br>E-20 |
| 6624   | FSCN1     | fascin homolog 1, actin-bundling protein (Strongylocentrotus purpuratus) | 13.80 | 11.22 | -2.56 | 4.88<br>E-24 | 2.54<br>E-22 |
| 4001   | LMNB1     | lamin B1                                                                 | 9.34  | 6.82  | -2.54 | 3.95<br>E-22 | 1.39<br>E-20 |
| 1058   | CENPA     | centromere protein A                                                     | 9.01  | 6.46  | -2.54 | 6.08<br>E-24 | 3.08<br>E-22 |
| 29128  | UHRF1     | ubiquitin-like with PHD and ring finger domains 1                        | 12.49 | 9.95  | -2.53 | 3.42<br>E-24 | 1.83<br>E-22 |
| 25886  | POC1A     | POC1 centriolar protein homolog A (Chlamydomonas)                        | 10.12 | 7.64  | -2.49 | 1.32<br>E-24 | 7.61<br>E-23 |
| 983    | CDK1      | cyclin-dependent kinase 1                                                | 9.06  | 6.62  | -2.43 | 8.32<br>E-20 | 1.84<br>E-18 |
| 29127  | RACGA P1  | Rac GTPase activating protein 1                                          | 9.45  | 7.06  | -2.40 | 1.59<br>E-23 | 7.27<br>E-22 |
| 10535  | RNASE H2A | ribonuclease H2, subunit A                                               | 9.73  | 7.34  | -2.39 | 8.89<br>E-24 | 4.29<br>E-22 |
| 10592  | SMC2      | structural maintenance of chromosomes 2                                  | 9.54  | 7.15  | -2.39 | 1.70<br>E-23 | 7.76<br>E-22 |
| 728643 | LOC728643 | heterogeneous nuclear ribonucleoprotein A1 pseudogene                    | 11.11 | 8.74  | -2.37 | 7.25<br>E-18 | 1.14<br>E-16 |
| 6119   | RPA3      | replication protein A3, 14kDa                                            | 11.69 | 9.33  | -2.36 | 2.48<br>E-23 | 1.09<br>E-21 |
| 55839  | CENPN     | centromere protein N                                                     | 9.92  | 7.56  | -2.35 | 1.08<br>E-21 | 3.54<br>E-20 |
| 4176   | MCM7      | minichromosome maintenance complex component 7                           | 12.35 | 10.00 | -2.34 | 1.35<br>E-23 | 6.30<br>E-22 |
| 84057  | MND1      | meiotic nuclear divisions 1 homolog (S. cerevisiae)                      | 8.76  | 6.42  | -2.34 | 9.30<br>E-23 | 3.63<br>E-21 |
| 7083   | TK1       | thymidine kinase 1, soluble                                              | 9.11  | 6.80  | -2.32 | 4.25<br>E-20 | 9.92<br>E-19 |
| 4173   | MCM4      | minichromosome maintenance complex component 4                           | 10.43 | 8.17  | -2.25 | 3.38<br>E-22 | 1.21<br>E-20 |
| 2189   | FANCG     | Fanconi anemia, complementation group                                    | 9.46  | 7.21  | -2.25 | 1.23<br>E-19 | 2.62<br>E-18 |

| G      |              |                                                                           |       |       |       |              |              |
|--------|--------------|---------------------------------------------------------------------------|-------|-------|-------|--------------|--------------|
| 9582   | APOBE<br>C3B | apolipoprotein B mRNA<br>editing enzyme, catalytic<br>polypeptide-like 3B | 8.58  | 6.34  | -2.25 | 1.75<br>E-20 | 4.45<br>E-19 |
| 3835   | KIF22        | kinesin family member<br>22                                               | 10.28 | 8.03  | -2.24 | 4.05<br>E-20 | 9.50<br>E-19 |
| 10544  | PROCR        | protein C receptor,<br>endothelial                                        | 9.06  | 6.83  | -2.24 | 1.34<br>E-20 | 3.43<br>E-19 |
| 2091   | FBL          | fibrillarin                                                               | 11.98 | 9.75  | -2.23 | 3.34<br>E-20 | 7.97<br>E-19 |
| 4171   | MCM2         | minichromosome<br>maintenance complex<br>component 2                      | 10.13 | 7.90  | -2.22 | 5.80<br>E-21 | 1.60<br>E-19 |
| 1063   | CENPF        | centromere protein F,<br>350/400kDa (mitosin)                             | 9.12  | 6.92  | -2.20 | 2.16<br>E-18 | 3.67<br>E-17 |
| 3489   | IGFBP6       | insulin-like growth factor<br>binding protein 6                           | 10.37 | 8.19  | -2.19 | 1.45<br>E-18 | 2.53<br>E-17 |
| 157313 | CDCA2        | cell division cycle<br>associated 2                                       | 8.57  | 6.39  | -2.19 | 2.11<br>E-23 | 9.45<br>E-22 |
| 55165  | CEP55        | centrosomal protein<br>55kDa                                              | 8.88  | 6.70  | -2.18 | 7.82<br>E-24 | 3.85<br>E-22 |
| 10383  | TUBB2<br>C   | tubulin, beta 2C                                                          | 12.38 | 10.21 | -2.18 | 8.55<br>E-22 | 2.85<br>E-20 |
| 55038  | CDCA4        | cell division cycle<br>associated 4                                       | 9.59  | 7.43  | -2.17 | 5.49<br>E-24 | 2.80<br>E-22 |
| 1515   | CTSL2        | cathepsin L2                                                              | 9.25  | 7.09  | -2.16 | 3.52<br>E-22 | 1.26<br>E-20 |
| 9585   | KIF20B       | kinesin family member<br>20B                                              | 9.44  | 7.28  | -2.16 | 5.24<br>E-22 | 1.80<br>E-20 |
| 891    | CCNB1        | cyclin B1                                                                 | 8.84  | 6.70  | -2.14 | 5.66<br>E-19 | 1.06<br>E-17 |
| 64943  | NT5DC<br>2   | 5'-nucleotidase domain<br>containing 2                                    | 10.23 | 8.10  | -2.13 | 2.37<br>E-18 | 4.01<br>E-17 |
| 10460  | TACC3        | transforming, acidic<br>coiled-coil containing<br>protein 3               | 8.64  | 6.50  | -2.13 | 5.28<br>E-21 | 1.47<br>E-19 |
| 78995  | C17orf5<br>3 | chromosome 17 open<br>reading frame 53                                    | 9.15  | 7.04  | -2.12 | 4.45<br>E-21 | 1.26<br>E-19 |
| 3329   | HSPD1        | heat shock 60kDa protein<br>1 (chaperonin)                                | 12.90 | 10.79 | -2.11 | 2.86<br>E-22 | 1.04<br>E-20 |
| 4175   | MCM6         | minichromosome<br>maintenance complex<br>component 6                      | 11.36 | 9.24  | -2.11 | 3.36<br>E-19 | 6.60<br>E-18 |
| 2305   | FOXM1        | forkhead box M1                                                           | 8.63  | 6.50  | -2.11 | 3.51<br>E-19 | 6.84<br>E-18 |
| 10024  | TROAP        | trophinin associated                                                      | 8.73  | 6.62  | -2.11 | 6.44         | 2.18         |

|        |              |                                                                           |       |      |       |              |              |
|--------|--------------|---------------------------------------------------------------------------|-------|------|-------|--------------|--------------|
|        |              | protein (tastin)                                                          |       |      |       | E-22         | E-20         |
| 24137  | KIF4A        | kinesin family member 4A                                                  | 8.40  | 6.31 | -2.11 | 9.38<br>E-20 | 2.06<br>E-18 |
| 10635  | RAD51<br>AP1 | RAD51 associated protein 1                                                | 9.02  | 6.93 | -2.10 | 1.02<br>E-21 | 3.35<br>E-20 |
| 3161   | HMMR         | hyaluronan-mediated motility receptor (RHAMM)                             | 8.41  | 6.34 | -2.08 | 5.61<br>E-21 | 1.55<br>E-19 |
| 1033   | CDKN3        | cyclin-dependent kinase inhibitor 3                                       | 8.92  | 6.85 | -2.08 | 2.96<br>E-19 | 5.92<br>E-18 |
| 7272   | TTK          | TTK protein kinase                                                        | 8.79  | 6.72 | -2.08 | 2.36<br>E-21 | 7.07<br>E-20 |
| 286527 | TMSB1<br>5B  | thymosin beta 15B                                                         | 11.25 | 9.18 | -2.07 | 2.49<br>E-22 | 9.19<br>E-21 |
| 1111   | CHEK1        | CHK1 checkpoint homolog (S. pombe)                                        | 8.67  | 6.59 | -2.06 | 1.62<br>E-20 | 4.15<br>E-19 |
| 54443  | ANLN         | anillin, actin binding protein                                            | 8.57  | 6.50 | -2.06 | 9.02<br>E-20 | 1.99<br>E-18 |
| 995    | CDC25<br>C   | cell division cycle 25 homolog C (S. pombe)                               | 8.41  | 6.37 | -2.05 | 1.27<br>E-21 | 4.06<br>E-20 |
| 4172   | MCM3         | minichromosome maintenance complex component 3                            | 11.67 | 9.62 | -2.05 | 6.87<br>E-22 | 2.33<br>E-20 |
| 84141  | FAM17<br>6A  | family with sequence similarity 176, member A                             | 9.55  | 7.51 | -2.04 | 5.53<br>E-22 | 1.89<br>E-20 |
| 51293  | CD320        | CD320 molecule                                                            | 9.79  | 7.74 | -2.04 | 3.20<br>E-20 | 7.65<br>E-19 |
| 51512  | GTSE1        | G-2 and S-phase expressed 1                                               | 8.61  | 6.57 | -2.04 | 3.59<br>E-21 | 1.03<br>E-19 |
| 6491   | STIL         | SCL/TAL1 interrupting locus                                               | 8.61  | 6.57 | -2.03 | 1.87<br>E-20 | 4.72<br>E-19 |
| 5604   | MAP2K<br>1   | mitogen-activated protein kinase kinase 1                                 | 11.82 | 9.82 | -2.01 | 1.03<br>E-20 | 2.73<br>E-19 |
| 23446  | SLC44A<br>1  | solute carrier family 44, member 1                                        | 11.04 | 9.03 | -2.01 | 1.67<br>E-18 | 2.89<br>E-17 |
| 2177   | FANCD<br>2   | Fanconi anemia, complementation group D2                                  | 8.93  | 6.93 | -2.01 | 8.22<br>E-19 | 1.48<br>E-17 |
| 65062  | ALS2C<br>R4  | amyotrophic lateral sclerosis 2 (juvenile) chromosome region, candidate 4 | 10.70 | 8.71 | -1.99 | 1.82<br>E-21 | 5.58<br>E-20 |
| 2192   | FBLN1        | fibulin 1                                                                 | 10.48 | 8.49 | -1.98 | 1.29<br>E-19 | 2.75<br>E-18 |
| 5557   | PRIM1        | primase, DNA, polypeptide 1 (49kDa)                                       | 9.17  | 7.19 | -1.98 | 1.32<br>E-20 | 3.40<br>E-19 |

|        |                |                                                                                                  |       |       |       |              |              |
|--------|----------------|--------------------------------------------------------------------------------------------------|-------|-------|-------|--------------|--------------|
| 55732  | C1orf11<br>2   | chromosome 1 open<br>reading frame 112                                                           | 8.91  | 6.94  | -1.98 | 5.15<br>E-21 | 1.44<br>E-19 |
| 2118   | ETV4           | ets variant 4                                                                                    | 9.22  | 7.27  | -1.97 | 5.66<br>E-16 | 6.32<br>E-15 |
| 664709 | HNRNP<br>A1P10 | heterogeneous nuclear<br>ribonucleoprotein A1<br>pseudogene 10                                   | 10.96 | 8.99  | -1.96 | 3.67<br>E-17 | 5.06<br>E-16 |
| 3336   | HSPE1          | heat shock 10kDa protein<br>1 (chaperonin 10)                                                    | 12.80 | 10.83 | -1.95 | 1.22<br>E-19 | 2.61<br>E-18 |
| 26271  | FBXO5          | F-box protein 5                                                                                  | 9.48  | 7.53  | -1.95 | 2.47<br>E-19 | 5.03<br>E-18 |
| 53827  | FXVD5          | FXVD domain<br>containing ion transport<br>regulator 5                                           | 10.74 | 8.79  | -1.95 | 9.83<br>E-19 | 1.76<br>E-17 |
| 10051  | SMC4           | structural maintenance of<br>chromosomes 4                                                       | 9.96  | 8.00  | -1.95 | 9.57<br>E-21 | 2.54<br>E-19 |
| 4174   | MCM5           | minichromosome<br>maintenance complex<br>component 5                                             | 9.47  | 7.53  | -1.94 | 4.80<br>E-19 | 9.15<br>E-18 |
| 4833   | NME4           | non-metastatic cells 4,<br>protein expressed in                                                  | 11.56 | 9.63  | -1.94 | 8.64<br>E-18 | 1.34<br>E-16 |
| 23421  | ITGB3B<br>P    | integrin beta 3 binding<br>protein (beta3-<br>endonexin)                                         | 8.49  | 6.57  | -1.92 | 1.27<br>E-18 | 2.24<br>E-17 |
| 83461  | CDCA3          | cell division cycle<br>associated 3                                                              | 8.29  | 6.38  | -1.91 | 6.12<br>E-19 | 1.13<br>E-17 |
| 8914   | TIMEL<br>ESS   | timeless homolog<br>(Drosophila)                                                                 | 9.88  | 7.96  | -1.91 | 2.02<br>E-20 | 5.04<br>E-19 |
| 1062   | CENPE          | centromere protein E,<br>312kDa                                                                  | 8.83  | 6.96  | -1.88 | 1.07<br>E-20 | 2.83<br>E-19 |
| 5050   | PAFAH<br>1B3   | platelet-activating factor<br>acetylhydrolase 1b,<br>catalytic subunit 3<br>(29kDa)              | 10.38 | 8.50  | -1.88 | 3.46<br>E-19 | 6.76<br>E-18 |
| 109    | ADCY3          | adenylate cyclase 3                                                                              | 10.17 | 8.32  | -1.85 | 6.16<br>E-20 | 1.38<br>E-18 |
| 5880   | RAC2           | ras-related C3 botulinum<br>toxin substrate 2 (rho<br>family, small GTP<br>binding protein Rac2) | 8.28  | 6.43  | -1.85 | 8.84<br>E-21 | 2.36<br>E-19 |
| 55771  | PRR11          | proline rich 11                                                                                  | 8.27  | 6.42  | -1.84 | 3.16<br>E-18 | 5.23<br>E-17 |
| 6839   | SUV39<br>H1    | suppressor of variegation<br>3-9 homolog 1<br>(Drosophila)                                       | 9.17  | 7.34  | -1.84 | 1.81<br>E-20 | 4.58<br>E-19 |
| 493    | ATP2B4         | ATPase, Ca <sup>++</sup>                                                                         | 8.74  | 6.93  | -1.83 | 1.33         | 1.64         |

|        |          |                                                 |       |       |       |              |              |
|--------|----------|-------------------------------------------------|-------|-------|-------|--------------|--------------|
|        |          | transporting, plasma membrane 4                 |       |       |       | E-16         | E-15         |
| 113457 | TUBA3 D  | tubulin, alpha 3d                               | 9.19  | 7.38  | -1.83 | 4.73<br>E-16 | 5.35<br>E-15 |
| 6241   | RRM2     | ribonucleotide reductase M2                     | 8.19  | 6.37  | -1.82 | 2.28<br>E-19 | 4.64<br>E-18 |
| 9918   | NCAPD 2  | non-SMC condensin I complex, subunit D2         | 10.40 | 8.59  | -1.80 | 7.70<br>E-17 | 9.93<br>E-16 |
| 83468  | GLT8D 2  | glycosyltransferase 8 domain containing 2       | 9.40  | 7.62  | -1.79 | 6.84<br>E-18 | 1.08<br>E-16 |
| 8407   | TAGLN 2  | transgelin 2                                    | 9.60  | 7.81  | -1.79 | 8.67<br>E-18 | 1.34<br>E-16 |
| 2956   | MSH6     | mutS homolog 6 (E. coli)                        | 10.52 | 8.74  | -1.79 | 3.42<br>E-19 | 6.70<br>E-18 |
| 54733  | SLC35F 2 | solute carrier family 35, member F2             | 8.69  | 6.92  | -1.78 | 7.62<br>E-19 | 1.39<br>E-17 |
| 1786   | DNMT1    | DNA (cytosine-5-)-methyltransferase 1           | 12.06 | 10.29 | -1.77 | 5.77<br>E-19 | 1.07<br>E-17 |
| 84321  | THOC3    | THO complex 3                                   | 10.01 | 8.26  | -1.76 | 4.10<br>E-17 | 5.57<br>E-16 |
| 201161 | CENPV    | centromere protein V                            | 10.76 | 9.02  | -1.74 | 2.81<br>E-17 | 3.96<br>E-16 |
| 91057  | CCDC3 4  | coiled-coil domain containing 34                | 10.86 | 9.15  | -1.73 | 2.61<br>E-17 | 3.70<br>E-16 |
| 4751   | NEK2     | NIMA (never in mitosis gene a)-related kinase 2 | 8.07  | 6.36  | -1.72 | 1.23<br>E-15 | 1.30<br>E-14 |
| 54780  | NSMCE 4A | non-SMC element 4 homolog A (S. cerevisiae)     | 10.38 | 8.66  | -1.72 | 3.96<br>E-18 | 6.45<br>E-17 |
| 5538   | PPT1     | palmitoyl-protein thioesterase 1                | 10.74 | 9.04  | -1.71 | 5.42<br>E-16 | 6.07<br>E-15 |
| 286016 | TPI1P2   | triosephosphate isomerase 1 pseudogene 2        | 10.50 | 8.80  | -1.70 | 5.84<br>E-18 | 9.30<br>E-17 |
| 9928   | KIF14    | kinesin family member 14                        | 8.40  | 6.71  | -1.69 | 3.54<br>E-18 | 5.80<br>E-17 |
| 8438   | RAD54 L  | RAD54-like (S. cerevisiae)                      | 8.14  | 6.46  | -1.68 | 1.37<br>E-18 | 2.40<br>E-17 |
| 29089  | UBE2T    | ubiquitin-conjugating enzyme E2T (putative)     | 10.20 | 8.53  | -1.67 | 1.48<br>E-17 | 2.19<br>E-16 |
| 9204   | ZMYM 6   | zinc finger, MYM-type 6                         | 10.22 | 8.57  | -1.65 | 7.83<br>E-17 | 1.01<br>E-15 |
| 26147  | PHF19    | PHD finger protein 19                           | 7.98  | 6.34  | -1.65 | 4.19<br>E-18 | 6.78<br>E-17 |
| 7035   | TFPI     | tissue factor pathway inhibitor (lipoprotein-   | 10.59 | 8.95  | -1.65 | 1.32<br>E-18 | 2.33<br>E-17 |

|        |         | associated coagulation inhibitor)                    |       |       |       |      |      |  |
|--------|---------|------------------------------------------------------|-------|-------|-------|------|------|--|
| 51278  | IERS5   | immediate early response 5                           | 10.38 | 8.74  | -1.65 | 8.56 | 1.09 |  |
|        |         |                                                      |       |       |       | E-17 | E-15 |  |
| 8208   | CHAF1B  | chromatin assembly factor 1, subunit B (p60)         | 8.19  | 6.54  | -1.64 | 6.18 | 1.14 |  |
|        |         |                                                      |       |       |       | E-19 | E-17 |  |
| 23165  | NUP205  | nucleoporin 205kDa                                   | 10.13 | 8.50  | -1.63 | 1.04 | 1.58 |  |
|        |         |                                                      |       |       |       | E-17 | E-16 |  |
| 23204  | ARL6IP1 | ADP-ribosylation factor-like 6 interacting protein 1 | 11.26 | 9.62  | -1.63 | 7.04 | 7.75 |  |
|        |         |                                                      |       |       |       | E-16 | E-15 |  |
| 9735   | KNTC1   | kinetochore associated 1                             | 8.75  | 7.13  | -1.62 | 8.09 | 7.46 |  |
|        |         |                                                      |       |       |       | E-15 | E-14 |  |
| 196792 | FAM24B  | family with sequence similarity 24, member B         | 9.09  | 7.47  | -1.62 | 3.35 | 4.66 |  |
|        |         |                                                      |       |       |       | E-17 | E-16 |  |
| 5725   | PTBP1   | polypyrimidine tract binding protein 1               | 13.04 | 11.43 | -1.61 | 5.36 | 1.01 |  |
|        |         |                                                      |       |       |       | E-19 | E-17 |  |
| 5351   | PLOD1   | procollagen-lysine 1, 2-oxoglutarate 5-dioxygenase 1 | 12.61 | 11.01 | -1.61 | 6.96 | 6.46 |  |
|        |         |                                                      |       |       |       | E-15 | E-14 |  |
| 25923  | ATL3    | atlastin GTPase 3                                    | 8.63  | 7.03  | -1.60 | 1.01 | 1.54 |  |
|        |         |                                                      |       |       |       | E-17 | E-16 |  |
| 93323  | HAUS8   | HAUS augmin-like complex, subunit 8                  | 8.59  | 6.99  | -1.60 | 4.03 | 5.49 |  |
|        |         |                                                      |       |       |       | E-17 | E-16 |  |
| 51129  | ANGPTL4 | angiopoietin-like 4                                  | 8.10  | 6.50  | -1.59 | 1.47 | 1.79 |  |
|        |         |                                                      |       |       |       | E-16 | E-15 |  |
| 65003  | MRPL11  | mitochondrial ribosomal protein L11                  | 10.28 | 8.68  | -1.59 | 3.41 | 3.34 |  |
|        |         |                                                      |       |       |       | E-15 | E-14 |  |
| 79001  | VKORC1  | vitamin K epoxide reductase complex, subunit 1       | 12.93 | 11.35 | -1.59 | 1.11 | 1.39 |  |
|        |         |                                                      |       |       |       | E-16 | E-15 |  |
| 10276  | NET1    | neuroepithelial cell transforming 1                  | 10.19 | 8.61  | -1.59 | 4.32 | 4.92 |  |
|        |         |                                                      |       |       |       | E-16 | E-15 |  |

<sup>a</sup>RD Mean lists the mean value from three biologically independent RD RNA samples from RD cells infected with a GFP-expressing lentivirus and placed in differentiation media for 72 h.

<sup>b</sup>Myotube Mean lists the mean value from three biologically independent primary human myotube RNA samples grown to confluency and placed in differentiation media for 72 h.

<sup>c</sup>Fold change represents the difference between the myotube and RD values and is a log<sub>2</sub> value.



**Supplemental Table S5. Downregulated myogenic genes expressed at comparable levels in RD cells.**

| Entrez ID | Symbol   | Gene Name                                              | RD value <sup>a</sup> | Myotube value <sup>b</sup> | Fold change <sup>c</sup> | p-value  | FDR      |
|-----------|----------|--------------------------------------------------------|-----------------------|----------------------------|--------------------------|----------|----------|
| 60        | ACTB     | actin, beta                                            | 13.92                 | 14.13                      | 0.18                     | 0.0396   | 0.0557   |
| 71        | ACTG1    | actin, gamma 1                                         | 14.09                 | 14.31                      | 0.24                     | 0.0114   | 0.0176   |
| 72        | ACTG2    | actin, gamma 2, smooth muscle, enteric                 | 6.20                  | 6.73                       | 0.53                     | 6.23E-05 | 0.0001   |
| 8751      | ADAM15   | ADAM metalloproteinase domain 15                       | 7.69                  | 7.13                       | -0.55                    | 1.10E-06 | 3.00E-06 |
| 159       | ADSS     | adenylosuccinate synthase                              | 8.97                  | 8.69                       | -0.28                    | 0.0075   | 0.0119   |
| 262       | AMD1     | adenosylmethionine decarboxylase 1                     | 8.24                  | 8.01                       | -0.22                    | 0.0315   | 0.0452   |
| 276       | AMY1A    | amylase, alpha 1A (salivary)                           | 7.40                  | 7.62                       | 0.21                     | 0.0394   | 0.0555   |
| 84168     | ANTXR1   | anthrax toxin receptor 1                               | 10.40                 | 11.37                      | 0.99                     | 2.90E-11 | 1.53E-10 |
| 316       | AOX1     | aldehyde oxidase 1                                     | 6.34                  | 6.68                       | 0.34                     | 0.0012   | 0.0021   |
| 396       | ARHGDI1A | Rho GDP dissociation inhibitor (GDI) alpha             | 9.87                  | 10.38                      | 0.51                     | 0.0001   | 0.0002   |
| 397       | ARHGDI1B | Rho GDP dissociation inhibitor (GDI) beta              | 6.37                  | 6.53                       | 0.17                     | 0.1006   | 0.1310   |
| 151188    | ARL6IP6  | ADP-ribosylation-like factor 6 interacting protein 6   | 9.09                  | 8.75                       | -0.34                    | 0.0023   | 0.0040   |
| 10552     | ARPC1A   | actin related protein 2/3 complex, subunit 1A, 41kDa   | 10.87                 | 10.65                      | -0.24                    | 0.0126   | 0.0193   |
| 10095     | ARPC1B   | actin related protein 2/3 complex, subunit 1B, 41kDa   | 8.38                  | 7.95                       | -0.42                    | 0.0002   | 0.0005   |
| 10092     | ARPC5    | actin related protein 2/3 complex, subunit 5, 16kDa    | 10.05                 | 10.61                      | 0.55                     | 2.73E-05 | 6.17E-05 |
| 8853      | ASAP2    | ArfGAP with SH3 domain, ankyrin repeat and PH domain 2 | 10.09                 | 9.36                       | -0.73                    | 1.01E-07 | 3.18E-07 |
| 558       | AXL      | AXL receptor tyrosine kinase                           | 9.10                  | 8.71                       | -0.39                    | 0.0004   | 0.0007   |
| 9274      | BCL7C    | B-cell CLL/lymphoma 7C                                 | 8.56                  | 8.84                       | 0.29                     | 0.0057   | 0.0092   |

|        |          |                                                                 |       |       |       |          |          |
|--------|----------|-----------------------------------------------------------------|-------|-------|-------|----------|----------|
| 55859  | BEX1     | brain expressed, X-linked 1                                     | 6.38  | 6.80  | 0.41  | 0.0002   | 0.0003   |
| 329    | BIRC2    | baculoviral IAP repeat containing 2                             | 8.59  | 9.35  | 0.76  | 3.46E-08 | 1.17E-07 |
| 79866  | C13orf34 | chromosome 13 open reading frame 34                             | 7.46  | 7.16  | -0.32 | 0.0116   | 0.0179   |
| 56005  | C19orf10 | chromosome 19 open reading frame 10                             | 10.70 | 10.37 | -0.33 | 0.0045   | 0.0075   |
| 57415  | C3orf14  | chromosome 3 open reading frame 14                              | 8.58  | 8.95  | 0.36  | 0.0004   | 0.0008   |
| 805    | CALM2    | calmodulin 2 (phosphorylase kinase, delta)                      | 12.12 | 11.76 | -0.37 | 0.0008   | 0.0014   |
| 835    | CASP2    | caspase 2, apoptosis-related cysteine peptidase                 | 9.68  | 9.37  | -0.32 | 0.0017   | 0.0030   |
| 874    | CBR3     | carbonyl reductase 3                                            | 6.87  | 7.03  | 0.16  | 0.1216   | 0.1557   |
| 147372 | CCBE1    | collagen and calcium binding EGF domains 1                      | 8.16  | 9.02  | 0.86  | 7.10E-08 | 2.30E-07 |
| 80071  | CCDC15   | coiled-coil domain containing 15                                | 7.66  | 7.20  | -0.46 | 6.74E-06 | 1.65E-05 |
| 114800 | CCDC85A  | coiled-coil domain containing 85A                               | 6.24  | 6.35  | 0.09  | 0.3355   | 0.3902   |
| 960    | CD44     | CD44 molecule (Indian blood group)                              | 9.53  | 10.74 | 1.21  | 3.07E-13 | 2.21E-12 |
| 966    | CD59     | CD59 molecule, complement regulatory protein                    | 8.67  | 8.31  | -0.37 | 0.0007   | 0.0013   |
| 64866  | CDCP1    | CUB domain containing protein 1                                 | 6.40  | 6.59  | 0.20  | 0.0667   | 0.0900   |
| 1000   | CDH2     | cadherin 2, type 1, N-cadherin (neuronal)                       | 11.39 | 11.17 | -0.19 | 0.2099   | 0.2558   |
| 1002   | CDH4     | cadherin 4, type 1, R-cadherin (retinal)                        | 6.92  | 6.44  | -0.48 | 5.83E-06 | 1.44E-05 |
| 84131  | CEP78    | centrosomal protein 78kDa                                       | 7.96  | 7.47  | -0.49 | 2.72E-06 | 7.05E-06 |
| 114335 | CGB1     | chorionic gonadotropin, beta polypeptide 1                      | 6.66  | 6.79  | 0.12  | 0.2280   | 0.2758   |
| 93659  | CGB5     | chorionic gonadotropin, beta polypeptide 5                      | 6.45  | 6.48  | 0.03  | 0.7648   | 0.8002   |
| 10370  | CITED2   | Cbp/p300-interacting transactivator, with Glu/Asp-rich carboxy- | 8.68  | 8.95  | 0.26  | 0.0297   | 0.0428   |

|       |         |                                                           |       |       |       |          |          |  |
|-------|---------|-----------------------------------------------------------|-------|-------|-------|----------|----------|--|
|       |         | terminal domain, 2                                        |       |       |       |          |          |  |
| 10970 | CKAP4   | cytoskeleton-associated protein 4                         | 11.31 | 10.76 | -0.56 | 6.44E-06 | 1.58E-05 |  |
| 1192  | CLIC1   | chloride intracellular channel 1                          | 11.75 | 11.42 | -0.33 | 0.0005   | 0.0009   |  |
| 54918 | CMTM6   | CKLF-like MARVEL transmembrane domain containing 6        | 8.89  | 8.77  | -0.11 | 0.2783   | 0.3298   |  |
| 29097 | CNIH4   | cornichon homolog 4 (Drosophila)                          | 9.74  | 9.95  | 0.21  | 0.0499   | 0.0691   |  |
| 25927 | CNRIP1  | cannabinoid receptor interacting protein 1                | 7.58  | 8.51  | 0.94  | 1.27E-11 | 7.06E-11 |  |
| 1305  | COL13A1 | collagen, type XIII, alpha 1                              | 7.05  | 6.84  | -0.23 | 0.0481   | 0.0668   |  |
| 23603 | CORO1C  | coronin, actin binding protein, 1C                        | 8.38  | 8.80  | 0.44  | 5.23E-05 | 0.0001   |  |
| 51200 | CPA4    | carboxypeptidase A4                                       | 6.83  | 6.67  | -0.16 | 0.1199   | 0.1538   |  |
| 1453  | CSNK1D  | casein kinase 1, delta D                                  | 7.53  | 8.00  | 0.48  | 1.45E-05 | 3.40E-05 |  |
| 1465  | CSRP1   | cysteine and glycine-rich protein 1                       | 10.54 | 10.06 | -0.49 | 0.0002   | 0.0003   |  |
| 1479  | CSTF3   | cleavage stimulation factor, 3' pre-RNA, subunit 3, 77kDa | 9.36  | 8.69  | -0.68 | 1.09E-07 | 3.44E-07 |  |
| 1503  | CTPS    | CTP synthase                                              | 9.22  | 8.77  | -0.44 | 0.0003   | 0.0006   |  |
| 79077 | DCTPP1  | dCTP pyrophosphatase 1                                    | 9.90  | 9.39  | -0.51 | 1.37E-05 | 3.22E-05 |  |
| 23576 | DDAH1   | dimethylarginine dimethylaminohydrolase 1                 | 8.83  | 8.71  | -0.13 | 0.2862   | 0.3381   |  |
| 91614 | DEPD C7 | DEP domain containing 7                                   | 7.32  | 7.81  | 0.49  | 3.21E-05 | 7.20E-05 |  |
| 81624 | DIAPH3  | diaphanous homolog 3 (Drosophila)                         | 6.97  | 6.63  | -0.34 | 0.0006   | 0.0011   |  |
| 22943 | DKK1    | dickkopf homolog 1 (Xenopus laevis)                       | 7.59  | 7.73  | 0.15  | 0.1212   | 0.1553   |  |
| 23234 | DNAJC9  | DnaJ (Hsp40) homolog, subfamily C, member 9               | 9.88  | 9.31  | -0.57 | 2.99E-06 | 7.68E-06 |  |
| 91039 | DPP9    | dipeptidyl-peptidase 9                                    | 8.68  | 8.31  | -0.38 | 0.0005   | 0.0009   |  |
| 10589 | DRAP1   | DR1-associated protein 1 (negative cofactor 2 alpha)      | 10.24 | 10.67 | 0.41  | 0.0001   | 0.0003   |  |
| 1847  | DUSP5   | dual specificity phosphatase 5                            | 8.44  | 8.54  | 0.10  | 0.3189   | 0.3728   |  |
| 1854  | DUT     | deoxyuridine                                              | 8.03  | 7.39  | -0.65 | 5.35E-   | 1.76E-   |  |

|        |          |                                                                                |       |       |       |          |          |
|--------|----------|--------------------------------------------------------------------------------|-------|-------|-------|----------|----------|
|        |          | triphosphatase                                                                 |       |       |       | 08       | 07       |
| 144455 | E2F7     | E2F transcription factor 7                                                     | 7.28  | 7.27  | -0.02 | 0.8450   | 0.8692   |
| 1906   | EDN1     | endothelin 1                                                                   | 6.52  | 6.61  | 0.09  | 0.2852   | 0.3371   |
| 64834  | ELOV L1  | elongation of very long chain fatty acids (FEN1/Elo2, SUR4/Elo3, yeast)-like 1 | 8.01  | 8.17  | 0.15  | 0.1377   | 0.1747   |
| 2012   | EMP1     | epithelial membrane protein 1                                                  | 10.84 | 11.22 | 0.38  | 0.0007   | 0.0014   |
| 2014   | EMP3     | epithelial membrane protein 3                                                  | 11.59 | 11.70 | 0.10  | 0.3969   | 0.4539   |
| 2022   | ENG      | endoglin                                                                       | 8.74  | 8.26  | -0.48 | 1.93E-05 | 4.46E-05 |
| 5167   | ENPP1    | ectonucleotide pyrophosphatase/phosphodiesterase 1                             | 6.67  | 6.84  | 0.16  | 0.1040   | 0.1350   |
| 1969   | EPHA2    | EPH receptor A2                                                                | 7.55  | 7.17  | -0.38 | 0.0024   | 0.0042   |
| 5393   | EXOS C9  | exosome component 9 C9                                                         | 8.69  | 8.65  | -0.04 | 0.7000   | 0.7431   |
| 2146   | EZH2     | enhancer of zeste homolog 2 (Drosophila)                                       | 7.83  | 7.32  | -0.52 | 5.17E-06 | 1.29E-05 |
| 64855  | FAM12 9B | family with sequence similarity 129, member B                                  | 9.36  | 9.55  | 0.19  | 0.0910   | 0.1196   |
| 2289   | FKBP5    | FK506 binding protein 5                                                        | 9.69  | 9.20  | -0.48 | 5.07E-05 | 0.0001   |
| 56776  | FMN2     | formin 2                                                                       | 6.34  | 6.64  | 0.30  | 0.0096   | 0.0149   |
| 8061   | FOSL1    | FOS-like antigen 1                                                             | 6.75  | 7.01  | 0.25  | 0.0139   | 0.0212   |
| 2297   | FOXD1    | forkhead box D1                                                                | 9.20  | 9.09  | -0.11 | 0.3632   | 0.4189   |
| 2697   | GJA1     | gap junction protein, alpha 1, 43kDa                                           | 7.24  | 7.80  | 0.55  | 5.36E-05 | 0.0001   |
| 51228  | GLTP     | glycolipid transfer protein                                                    | 10.71 | 10.66 | -0.05 | 0.5945   | 0.6470   |
| 51053  | GMNN     | geminin, DNA replication inhibitor                                             | 7.78  | 7.23  | -0.55 | 8.11E-05 | 0.0002   |
| 3015   | H2AFZ    | H2A histone family, member Z                                                   | 12.89 | 12.39 | -0.50 | 3.22E-05 | 7.23E-05 |
| 64399  | HHIP     | hedgehog interacting protein                                                   | 6.59  | 6.61  | 0.03  | 0.7547   | 0.7912   |
| 3150   | HMGN 1   | high-mobility group nucleosome binding domain 1                                | 11.10 | 10.28 | -0.82 | 9.32E-10 | 3.95E-09 |
| 3151   | HMGN     | high-mobility group                                                            | 8.03  | 7.57  | -0.46 | 0.0004   | 0.0007   |

|        |           |                                                                        |       |       |       |          |          |  |
|--------|-----------|------------------------------------------------------------------------|-------|-------|-------|----------|----------|--|
|        | 2         | nucleosomal binding domain 2                                           |       |       |       |          |          |  |
| 3212   | HOXB2     | homeobox B2                                                            | 9.21  | 9.06  | -0.14 | 0.1193   | 0.1531   |  |
| 9955   | HS3ST3A1  | heparan sulfate (glucosamine) 3-O-sulfotransferase 3A1                 | 8.32  | 8.14  | -0.18 | 0.0849   | 0.1123   |  |
| 3397   | ID1       | inhibitor of DNA binding 1, dominant negative helix-loop-helix protein | 7.55  | 6.88  | -0.68 | 1.34E-07 | 4.15E-07 |  |
| 3399   | ID3       | inhibitor of DNA binding 3, dominant negative helix-loop-helix protein | 9.61  | 9.04  | -0.57 | 1.86E-06 | 4.91E-06 |  |
| 83982  | IFI27L2   | interferon, alpha-inducible protein 27-like 2                          | 8.13  | 8.38  | 0.24  | 0.0558   | 0.0764   |  |
| 121457 | IKBIP     | IKBKB interacting protein                                              | 8.17  | 7.95  | -0.21 | 0.0842   | 0.1114   |  |
| 50615  | IL21R     | interleukin 21 receptor                                                | 7.00  | 6.86  | -0.15 | 0.1330   | 0.1691   |  |
| 8826   | IQGAP1    | IQ motif containing GTPase activating protein 1                        | 7.84  | 7.80  | -0.04 | 0.7344   | 0.7738   |  |
| 8515   | ITGA10    | integrin, alpha 10                                                     | 7.11  | 7.12  | 0.01  | 0.8975   | 0.9155   |  |
| 3725   | JUN       | jun proto-oncogene                                                     | 9.16  | 9.44  | 0.28  | 0.0107   | 0.0166   |  |
| 89822  | KCNK17    | potassium channel, subfamily K, member 17                              | 6.50  | 6.39  | -0.12 | 0.2650   | 0.3157   |  |
| 3776   | KCNK2     | potassium channel, subfamily K, member 2                               | 6.42  | 6.61  | 0.20  | 0.0724   | 0.0970   |  |
| 54793  | KCTD9     | potassium channel tetramerisation domain containing 9                  | 7.38  | 7.49  | 0.10  | 0.2934   | 0.3457   |  |
| 3885   | KRT34     | keratin 34                                                             | 6.49  | 6.75  | 0.25  | 0.0133   | 0.0203   |  |
| 3887   | KRT81     | keratin 81                                                             | 6.43  | 6.74  | 0.30  | 0.0025   | 0.0043   |  |
| 3892   | KRT86     | keratin 86                                                             | 6.52  | 6.59  | 0.09  | 0.3977   | 0.4546   |  |
| 728255 | KRTA P1-4 | keratin associated protein 1-4                                         | 6.47  | 6.41  | -0.06 | 0.5422   | 0.5972   |  |
| 83895  | KRTA P1-5 | keratin associated protein 1-5                                         | 6.50  | 6.74  | 0.23  | 0.0466   | 0.0649   |  |
| 3927   | LASP1     | LIM and SH3 protein 1                                                  | 11.21 | 10.89 | -0.31 | 0.0070   | 0.0111   |  |
| 353139 | LCE2A     | late cornified envelope                                                | 6.51  | 6.48  | -0.02 | 0.8665   | 0.8885   |  |

|               |                      | 2A                                                                        |       |       |       |              |                 |
|---------------|----------------------|---------------------------------------------------------------------------|-------|-------|-------|--------------|-----------------|
| 353142        | LCE3A                | late cornified envelope<br>3A                                             | 6.40  | 6.47  | 0.07  | 0.4770       | 0.5341          |
| 91289         | LMF2                 | lipase maturation<br>factor 2                                             | 8.09  | 7.96  | -0.12 | 0.1384       | 0.1754          |
| 100216<br>001 | LOC10<br>021600<br>1 | hypothetical<br>LOC100216001                                              | 6.55  | 6.62  | 0.07  | 0.4559       | 0.5135          |
| 644936        | LOC64<br>4936        | actin, beta pseudogene                                                    | 7.29  | 7.16  | -0.14 | 0.2534       | 0.3033          |
| 653888        | LOC65<br>3888        | actin-related protein<br>2/3 complex subunit<br>1B-like                   | 8.21  | 7.71  | -0.49 | 2.01E-<br>05 | 4.63E-<br>05    |
| 728026        | LOC72<br>8026        | hypothetical protein<br>LOC728026                                         | 7.55  | 7.26  | -0.30 | 0.0505       | 0.0699          |
| 729086        | LOC72<br>9086        | vesicular,<br>overexpressed in<br>cancer, prosurvival<br>protein 1-like   | 7.33  | 6.80  | -0.54 | 2.61E-<br>06 | 6.76E-<br>06    |
| 4016          | LOXL1                | lysyl oxidase-like 1                                                      | 8.04  | 8.49  | 0.45  | 0.0014       | 0.0024          |
| 9404          | LPXN                 | leupaxin                                                                  | 7.53  | 7.85  | 0.32  | 0.0090       | 0.0142          |
| 130576        | LYPD6<br>B           | LY6/PLAUR domain<br>containing 6B                                         | 7.55  | 7.77  | 0.22  | 0.0653       | 0.0884          |
| 4154          | MBNL<br>1            | muscleblind-like<br>(Drosophila)                                          | 8.16  | 8.67  | 0.50  | 8.04E-<br>05 | 0.0002          |
| 90411         | MCFD<br>2            | multiple coagulation<br>factor deficiency 2                               | 8.77  | 8.55  | -0.23 | 0.0394       | 0.0555          |
| 4201          | MEA1                 | male-enhanced<br>antigen 1                                                | 8.91  | 8.42  | -0.50 | 0.0002       | 0.0003<br>40001 |
| 11343         | MGLL                 | monoglyceride lipase                                                      | 8.09  | 8.45  | 0.35  | 0.0016       | 0.0027          |
| 197259        | MLKL                 | mixed lineage kinase<br>domain-like                                       | 7.09  | 6.78  | -0.32 | 0.0034       | 0.0057          |
| 58538         | MPP4                 | membrane protein,<br>palmitoylated 4<br>(MAGUK p55<br>subfamily member 4) | 6.65  | 6.42  | -0.23 | 0.0422       | 0.0591          |
| 51318         | MRPL3<br>5           | mitochondrial<br>ribosomal protein L35                                    | 9.52  | 9.11  | -0.42 | 7.63E-<br>05 | 0.0002          |
| 4489          | MT1A                 | metallothionein 1A                                                        | 10.88 | 11.47 | 0.57  | 1.98E-<br>05 | 4.57E-<br>05    |
| 4501          | MT1X                 | metallothionein 1X                                                        | 10.36 | 9.91  | -0.45 | 0.0002       | 0.0003          |
| 10903         | MTMR<br>11           | myotubularin related<br>protein 11                                        | 7.29  | 7.07  | -0.23 | 0.0165       | 0.0249          |
| 4603          | MYBL<br>1            | v-myb myeloblastosis<br>viral oncogene<br>homolog (avian)-like 1          | 6.63  | 6.47  | -0.15 | 0.2118       | 0.2579          |

|        |          |                                                                                    |       |       |       |          |          |
|--------|----------|------------------------------------------------------------------------------------|-------|-------|-------|----------|----------|
| 4617   | MYF5     | myogenic factor 5                                                                  | 6.69  | 8.08  | 1.39  | 1.71E-14 | 1.50E-13 |
| 440145 | MZT1     | mitotic spindle organizing protein 1                                               | 6.73  | 7.65  | 0.92  | 3.22E-10 | 1.46E-09 |
| 54892  | NCAP G2  | non-SMC condensin II complex, subunit G2                                           | 7.77  | 7.34  | -0.44 | 7.01E-05 | 0.0001   |
| 57552  | NCEH1    | neutral cholesterol ester hydrolase 1                                              | 6.80  | 7.55  | 0.75  | 1.84E-10 | 8.62E-10 |
| 55967  | NDUF A12 | NADH dehydrogenase (ubiquinone) 1 alpha subcomplex, 12                             | 11.70 | 11.17 | -0.53 | 4.28E-07 | 1.24E-06 |
| 64332  | NFKB1 Z  | nuclear factor of kappa light polypeptide gene enhancer in B-cells inhibitor, zeta | 7.81  | 7.71  | -0.11 | 0.2712   | 0.3223   |
| 51388  | NIP7     | nuclear import 7 homolog (S. cerevisiae)                                           | 9.49  | 9.14  | -0.36 | 0.0002   | 0.0004   |
| 4831   | NME2     | non-metastatic cells 2, protein (NM23B) expressed in                               | 7.67  | 7.96  | 0.30  | 0.0037   | 0.0062   |
| 57407  | NMRA L1  | NmrA-like family domain containing 1                                               | 8.39  | 8.41  | 0.02  | 0.8137   | 0.8425   |
| 9397   | NMT2     | N-myristoyltransferase 2                                                           | 6.56  | 6.94  | 0.37  | 0.0008   | 0.0015   |
| 7025   | NR2F1    | nuclear receptor subfamily 2, group F, member 1                                    | 7.94  | 7.48  | -0.46 | 8.89E-05 | 0.0002   |
| 56675  | NRIP3    | nuclear receptor interacting protein 3                                             | 7.99  | 8.11  | 0.12  | 0.3164   | 0.3702   |
| 11164  | NUDT 5   | nudix (nucleoside diphosphate linked moiety X)-type motif 5                        | 9.89  | 9.37  | -0.53 | 1.52E-06 | 4.06E-06 |
| 4942   | OAT      | ornithine aminotransferase                                                         | 9.89  | 9.19  | -0.70 | 5.49E-06 | 1.36E-05 |
| 64859  | OBFC2 A  | oligonucleotide/oligosaccharide-binding fold containing 2A                         | 7.65  | 8.12  | 0.48  | 4.88E-06 | 1.22E-05 |
| 132299 | OCIAD 2  | OCIA domain containing 2                                                           | 6.55  | 7.98  | 1.44  | 1.52E-14 | 1.35E-13 |
| 56944  | OLFM L3  | olfactomedin-like 3                                                                | 8.74  | 8.67  | -0.08 | 0.5365   | 0.5918   |
| 23762  | OSBP2    | oxysterol binding protein 2                                                        | 7.07  | 7.51  | 0.45  | 6.47E-05 | 0.0001   |

|        |          |                                                          |       |       |       |          |          |
|--------|----------|----------------------------------------------------------|-------|-------|-------|----------|----------|
| 130497 | OSR1     | odd-skipped related 1 (Drosophila)                       | 6.97  | 7.10  | 0.12  | 0.2701   | 0.3211   |
| 9060   | PAPSS2   | 3'-phosphoadenosine 5'-phosphosulfate synthase 2         | 7.49  | 7.52  | 0.04  | 0.6960   | 0.7397   |
| 79668  | PARP8    | poly (ADP-ribose) polymerase family, member 8            | 9.39  | 9.06  | -0.34 | 0.0056   | 0.0090   |
| 5111   | PCNA     | proliferating cell nuclear antigen                       | 9.43  | 8.89  | -0.54 | 1.33E-05 | 3.13E-05 |
| 5315   | PKM2     | pyruvate kinase, muscle                                  | 9.01  | 8.68  | -0.33 | 0.0056   | 0.0090   |
| 5327   | PLAT     | plasminogen activator, tissue                            | 10.34 | 10.29 | -0.05 | 0.6865   | 0.7312   |
| 5329   | PLAUR    | plasminogen activator, urokinase receptor                | 6.78  | 7.24  | 0.46  | 3.74E-05 | 8.30E-05 |
| 5337   | PLD1     | phospholipase D1, phosphatidylcholine-specific           | 7.31  | 6.80  | -0.53 | 3.73E-06 | 9.48E-06 |
| 200150 | PLD5     | phospholipase D family, member 5                         | 6.58  | 7.00  | 0.41  | 0.0003   | 0.0006   |
| 26499  | PLEK2    | pleckstrin 2                                             | 6.46  | 6.64  | 0.18  | 0.0857   | 0.1132   |
| 123    | PLIN2    | perilipin 2                                              | 10.01 | 9.77  | -0.24 | 0.0158   | 0.0239   |
| 5352   | PLOD2    | procollagen-lysine, 2-oxoglutarate 5-dioxygenase 2       | 7.27  | 7.74  | 0.46  | 0.0003   | 0.0006   |
| 5420   | PODXL    | podocalyxin-like                                         | 7.83  | 8.79  | 0.97  | 1.49E-12 | 9.49E-12 |
| 5441   | POLR2L   | polymerase (RNA) II (DNA directed) polypeptide L, 7.6kDa | 7.75  | 8.01  | 0.26  | 0.0104   | 0.0162   |
| 728378 | POTEF    | POTE ankyrin domain family, member F                     | 13.10 | 12.68 | -0.41 | 0.0003   | 0.0005   |
| 10549  | PRDX4    | peroxiredoxin 4                                          | 10.89 | 10.55 | -0.34 | 0.0022   | 0.0038   |
| 5580   | PRKC D   | protein kinase C, delta                                  | 8.19  | 8.22  | 0.03  | 0.7402   | 0.7790   |
| 8624   | PSMG1    | proteasome (prosome, macropain) assembly chaperone 1     | 8.60  | 8.55  | -0.05 | 0.6597   | 0.7066   |
| 5757   | PTMA     | prothymosin, alpha                                       | 7.62  | 7.29  | -0.37 | 0.0745   | 0.0996   |
| 51495  | PTPLA D1 | protein tyrosine phosphatase-like A domain containing 1  | 10.84 | 9.86  | -0.99 | 4.05E-12 | 2.42E-11 |
| 11137  | PWP1     | PWP1 homolog (S. cerevisiae)                             | 10.31 | 9.82  | -0.48 | 2.87E-06 | 7.41E-06 |
| 5768   | QSOX1    | quiescin Q6 sulfhydryl                                   | 10.00 | 9.94  | -0.08 | 0.5873   | 0.6404   |



|        |           |                                                                      |       |       |       |          |          |  |
|--------|-----------|----------------------------------------------------------------------|-------|-------|-------|----------|----------|--|
|        |           | oxidase 1                                                            |       |       |       |          |          |  |
| 5891   | RAGE      | renal tumor antigen                                                  | 8.25  | 7.93  | -0.31 | 0.0041   | 0.0068   |  |
| 5932   | RBBP8     | retinoblastoma binding protein 8                                     | 8.65  | 8.44  | -0.21 | 0.0323   | 0.0462   |  |
| 57333  | RCN3      | reticulocalbin 3, EF-hand calcium binding domain                     | 8.63  | 8.84  | 0.21  | 0.0337   | 0.0481   |  |
| 8601   | RGS20     | regulator of G-protein signaling 20                                  | 7.25  | 6.68  | -0.57 | 9.54E-07 | 2.63E-06 |  |
| 389    | RHOC      | ras homolog gene family, member C                                    | 11.34 | 10.59 | -0.75 | 1.90E-08 | 6.66E-08 |  |
| 391    | RHOG      | ras homolog gene family, member G (rho G)                            | 9.63  | 9.45  | -0.19 | 0.0432   | 0.0604   |  |
| 284996 | RNF149    | ring finger protein 149                                              | 9.92  | 9.46  | -0.46 | 1.35E-05 | 3.19E-05 |  |
| 6237   | RRAS      | related RAS viral (rras) oncogene homolog                            | 10.23 | 10.33 | 0.09  | 0.3889   | 0.4455   |  |
| 6238   | RRBP1     | ribosome binding protein 1 homolog 180kDa (dog)                      | 11.01 | 10.39 | -0.62 | 1.81E-06 | 4.80E-06 |  |
| 27341  | RRP7A     | ribosomal RNA processing 7 homolog A ( <i>S. cerevisiae</i> )        | 9.56  | 9.64  | 0.08  | 0.3680   | 0.4238   |  |
| 1903   | S1PR3     | sphingosine-1-phosphate receptor 3                                   | 7.45  | 6.93  | -0.53 | 1.02E-06 | 2.80E-06 |  |
| 51435  | SCAR A3   | scavenger receptor class A, member 3                                 | 6.89  | 6.54  | -0.34 | 0.0021   | 0.0037   |  |
| 9117   | SEC22 C   | SEC22 vesicle trafficking protein homolog C ( <i>S. cerevisiae</i> ) | 8.58  | 8.73  | 0.16  | 0.0735   | 0.0984   |  |
| 8482   | SEMA 7A   | semaphorin 7A, GPI membrane anchor (John Milton Hagen blood group)   | 6.92  | 6.90  | -0.03 | 0.7627   | 0.7981   |  |
| 8710   | SERP1 NB7 | serpin peptidase inhibitor, clade B (ovalbumin), member 7            | 6.57  | 6.44  | -0.13 | 0.1757   | 0.2180   |  |
| 29950  | SERTA D1  | SERTA domain containing 1                                            | 9.09  | 9.49  | 0.40  | 6.53E-05 | 0.0001   |  |
| 6446   | SGK1      | serum/glucocorticoid regulated kinase 1                              | 7.76  | 8.10  | 0.33  | 0.0068   | 0.0109   |  |
| 10019  | SH2B3     | SH2B adaptor protein                                                 | 9.92  | 9.66  | -0.25 | 0.0258   | 0.0376   |  |

| 3      |              |                                                                                            |       |       |       |              |              |
|--------|--------------|--------------------------------------------------------------------------------------------|-------|-------|-------|--------------|--------------|
| 83442  | SH3BG<br>RL3 | SH3 domain binding<br>glutamic acid-rich<br>protein like 3                                 | 10.32 | 10.20 | -0.12 | 0.1914       | 0.2352       |
| 152503 | SH3D1<br>9   | SH3 domain<br>containing 19                                                                | 7.65  | 7.35  | -0.31 | 0.0013       | 0.0023       |
| 7884   | SLBP         | stem-loop binding<br>protein                                                               | 9.45  | 8.86  | -0.58 | 1.82E-<br>06 | 4.83E-<br>06 |
| 6574   | SLC20<br>A1  | solute carrier family<br>20 (phosphate<br>transporter), member 1                           | 10.69 | 10.73 | 0.04  | 0.6769       | 0.7227       |
| 29015  | SLC43<br>A3  | solute carrier family<br>43, member 3                                                      | 6.58  | 6.93  | 0.35  | 0.0016       | 0.0028       |
| 57228  | SMAG<br>P    | small cell adhesion<br>glycoprotein                                                        | 7.24  | 7.32  | 0.08  | 0.4759       | 0.5330       |
| 574042 | SNOR<br>A10  | small nucleolar RNA,<br>H/ACA box 10                                                       | 7.55  | 7.29  | -0.27 | 0.0244       | 0.0357       |
| 677838 | SNOR<br>A61  | small nucleolar RNA,<br>H/ACA box 61                                                       | 7.45  | 7.62  | 0.17  | 0.1369       | 0.1738       |
| 619571 | SNOR<br>D96A | small nucleolar RNA,<br>C/D box 96A                                                        | 7.11  | 7.00  | -0.13 | 0.2485       | 0.2981       |
| 27131  | SNX5         | sorting nexin 5                                                                            | 8.60  | 8.36  | -0.24 | 0.0155       | 0.0235       |
| 60559  | SPCS3        | signal peptidase<br>complex subunit 3<br>homolog (S.<br>cerevisiae)                        | 8.37  | 7.24  | -1.13 | 1.13E-<br>12 | 7.37E-<br>12 |
| 6427   | SRSF2        | serine/arginine-rich<br>splicing factor 2                                                  | 11.45 | 11.14 | -0.30 | 0.0008       | 0.0014       |
| 6428   | SRSF3        | serine/arginine-rich<br>splicing factor 3                                                  | 8.98  | 8.48  | -0.49 | 2.53E-<br>05 | 5.77E-<br>05 |
| 8614   | STC2         | stanniocalcin 2                                                                            | 11.27 | 10.80 | -0.49 | 0.0018       | 0.0031       |
| 55240  | STEAP<br>3   | STEAP family<br>member 3                                                                   | 8.34  | 8.09  | -0.25 | 0.0167       | 0.0250       |
| 8801   | SUCL<br>G2   | succinate-CoA ligase,<br>GDP-forming, beta<br>subunit                                      | 8.79  | 8.63  | -0.17 | 0.0864       | 0.1140       |
| 85012  | TCEAL<br>3   | transcription<br>elongation factor A<br>(SII)-like 3                                       | 9.45  | 9.92  | 0.47  | 5.71E-<br>05 | 0.0001       |
| 7041   | TGFB1<br>I1  | transforming growth<br>factor beta 1 induced<br>transcript 1                               | 9.23  | 9.31  | 0.08  | 0.4091       | 0.4662       |
| 7052   | TGM2         | transglutaminase 2 (C<br>polypeptide, protein-<br>glutamine-gamma-<br>glutamyltransferase) | 6.45  | 7.79  | 1.34  | 3.47E-<br>14 | 2.89E-<br>13 |

|        |              |                                                                    |       |       |       |              |              |
|--------|--------------|--------------------------------------------------------------------|-------|-------|-------|--------------|--------------|
| 134285 | TMEM<br>171  | transmembrane<br>protein 171                                       | 6.29  | 6.67  | 0.38  | 0.0003       | 0.0005       |
| 93109  | TMEM<br>44   | transmembrane<br>protein 44                                        | 8.13  | 7.63  | -0.50 | 1.68E-<br>06 | 4.47E-<br>06 |
| 7117   | TMSL3        | thymosin-like 3                                                    | 9.82  | 9.82  | 0.00  | 0.9805       | 0.9843       |
| 8771   | TNFRS<br>F6B | tumor necrosis factor<br>receptor superfamily,<br>member 6b, decoy | 6.60  | 6.85  | 0.24  | 0.0531       | 0.0731       |
| 7169   | TPM2         | tropomyosin 2 (beta)                                               | 9.84  | 13.52 | 3.68  | 7.26E-<br>28 | 9.31E-<br>26 |
| 6434   | TRA2B        | transformer 2 beta<br>homolog (Drosophila)                         | 9.90  | 9.42  | -0.48 | 0.0002       | 0.0003       |
| 9697   | TRAM<br>2    | translocation<br>associated membrane<br>protein 2                  | 8.75  | 9.16  | 0.41  | 0.0001       | 0.0003       |
| 84675  | TRIM5<br>5   | tripartite motif<br>containing 55                                  | 6.41  | 7.09  | 0.67  | 2.66E-<br>07 | 7.91E-<br>07 |
| 57570  | TRMT<br>5    | TRM5 tRNA<br>methyltransferase 5<br>homolog (S.<br>cerevisiae)     | 12.06 | 11.77 | -0.28 | 0.0090       | 0.0141       |
| 388610 | TRNP1        | TMF1-regulated<br>nuclear protein 1                                | 8.13  | 7.73  | -0.40 | 7.08E-<br>05 | 0.0002       |
| 7106   | TSPAN<br>4   | tetraspanin 4                                                      | 9.95  | 9.37  | -0.58 | 6.25E-<br>06 | 1.54E-<br>05 |
| 706    | TSPO         | translocator protein<br>(18kDa)                                    | 9.93  | 10.40 | 0.47  | 0.0003       | 0.0006       |
| 84790  | TUBA1<br>C   | tubulin, alpha 1c                                                  | 13.67 | 13.19 | -0.50 | 1.28E-<br>05 | 3.02E-<br>05 |
| 7280   | TUBB2<br>A   | tubulin, beta 2A                                                   | 8.24  | 8.75  | 0.51  | 9.44E-<br>07 | 2.60E-<br>06 |
| 57045  | TWSG<br>1    | twisted gastrulation<br>homolog 1<br>(Drosophila)                  | 7.95  | 7.77  | -0.18 | 0.1148       | 0.1478       |
| 7295   | TXN          | thioredoxin                                                        | 13.31 | 12.64 | -0.66 | 1.16E-<br>08 | 4.19E-<br>08 |
| 7360   | UGP2         | UDP-glucose<br>pyrophosphorylase 2                                 | 9.93  | 10.73 | 0.80  | 3.93E-<br>10 | 1.76E-<br>09 |
| 7381   | UQCR<br>B    | ubiquinol-cytochrome<br>c reductase binding<br>protein             | 8.80  | 8.51  | -0.29 | 0.0023       | 0.0039       |
| 8673   | VAMP<br>8    | vesicle-associated<br>membrane protein 8<br>(endobrevin)           | 8.10  | 8.19  | 0.08  | 0.4952       | 0.5515       |
| 7424   | VEGF<br>C    | vascular endothelial<br>growth factor C                            | 7.58  | 7.86  | 0.29  | 0.0100       | 0.0156       |

|      |       |                                                                                          |       |       |       |          |        |
|------|-------|------------------------------------------------------------------------------------------|-------|-------|-------|----------|--------|
| 7431 | VIM   | vimentin                                                                                 | 13.69 | 13.30 | -0.40 | 7.50E-05 | 0.0002 |
| 7533 | YWHAH | tyrosine 3-monooxygenase/tryptophan 5-monooxygenase activation protein, eta polypeptide  | 11.38 | 11.34 | -0.05 | 0.5544   | 0.6090 |
| 7534 | YWHAZ | tyrosine 3-monooxygenase/tryptophan 5-monooxygenase activation protein, zeta polypeptide | 11.82 | 11.70 | -0.12 | 0.2023   | 0.2475 |
| 7538 | ZFP36 | zinc finger protein 36, C3H type, homolog (mouse)                                        | 8.36  | 8.14  | -0.22 | 0.0593   | 0.0808 |

<sup>a</sup>RD Mean lists the mean value from three biologically independent RD RNA samples from RD cells infected with a GFP-expressing lentivirus and placed in differentiation media for 72 h.

<sup>b</sup>Myotube Mean lists the mean value from three biologically independent primary human myotube RNA samples grown to confluency and placed in differentiation media for 72 h.

<sup>c</sup>Fold change represents the difference between the myotube and RD values and is a log<sub>2</sub> value.

**Supplemental Table S6. Locations and scores of regional differences in MyoD binding between RD and primary cells.**

| <b>Chromosome<sup>a</sup></b> | <b>Start position<sup>b</sup></b> | <b>End position<sup>c</sup></b> | <b>Width<sup>d</sup></b> | <b>Difference<sup>e</sup></b> |
|-------------------------------|-----------------------------------|---------------------------------|--------------------------|-------------------------------|
| chr1                          | 80014899                          | 84293968                        | 4279070                  | 109.25                        |
| chr8                          | 49930842                          | 52438946                        | 2508105                  | 77.72                         |
| chr20                         | 57626569                          | 58519308                        | 892740                   | 56.83                         |
| chr2                          | 129138573                         | 130467481                       | 1328909                  | 54.82                         |
| chr20                         | 46471676                          | 47133160                        | 661485                   | 52.16                         |
| chr14                         | 105965574                         | 107252545                       | 1286972                  | 47.76                         |
| chr2                          | 136823055                         | 137135587                       | 312533                   | 46.86                         |
| chr5                          | 134968512                         | 135166582                       | 198071                   | 44.98                         |
| chr2                          | 167023541                         | 168732445                       | 1708905                  | 44.31                         |
| chr19                         | 34058818                          | 34732757                        | 673940                   | 44.24                         |
| chr8                          | 2511430                           | 6322072                         | 3810643                  | 42.18                         |
| chr2                          | 3715754                           | 5662045                         | 1946292                  | 40.77                         |
| chr19                         | 57386639                          | 57651476                        | 264838                   | 40.25                         |
| chr16                         | 78964512                          | 79614766                        | 650255                   | 38.02                         |
| chr3                          | 89411319                          | 94025601                        | 4614283                  | 37.55                         |
| chr11                         | 15521224                          | 16473403                        | 952180                   | 37.37                         |
| chr7                          | 42145191                          | 42999648                        | 854458                   | 37.30                         |
| chr21                         | 32746619                          | 33286557                        | 539939                   | 36.12                         |
| chr2                          | 75780939                          | 78305135                        | 2524197                  | 36.05                         |
| chr7                          | 37328882                          | 37983984                        | 655103                   | 35.44                         |
| chr1                          | 245306233                         | 245751394                       | 445162                   | 34.92                         |
| chr8                          | 13086189                          | 17022848                        | 3936660                  | 34.66                         |
| chr18                         | 58113869                          | 58731031                        | 617163                   | 33.63                         |
| chr5                          | 116095643                         | 116498060                       | 402418                   | 33.40                         |
| chr17                         | 10802560                          | 11827796                        | 1025237                  | 33.26                         |
| chr14                         | 43273392                          | 45553911                        | 2280520                  | 32.87                         |
| chr7                          | 8383272                           | 10469041                        | 2085770                  | 32.76                         |
| chr8                          | 23772283                          | 23904625                        | 132343                   | 31.74                         |
| chr20                         | 18820069                          | 19400520                        | 580452                   | 30.88                         |
| chr14                         | 69966437                          | 70448267                        | 481831                   | 30.49                         |
| chr10                         | 56168174                          | 59783236                        | 3615063                  | 30.39                         |
| chr22                         | 46709872                          | 47164882                        | 455011                   | -30.10                        |
| chr15                         | 81136255                          | 81605992                        | 469738                   | -30.21                        |
| chr1                          | 161101915                         | 161692661                       | 590747                   | -30.30                        |
| chr20                         | 6056064                           | 8064221                         | 2008158                  | -30.85                        |
| chr15                         | 75901954                          | 77080035                        | 1178082                  | -30.97                        |
| chr3                          | 10231204                          | 11237389                        | 1006186                  | -31.04                        |
| chr7                          | 131305379                         | 133113705                       | 1808327                  | -31.12                        |

|       |           |           |         |        |
|-------|-----------|-----------|---------|--------|
| chr2  | 18284403  | 20001544  | 1717142 | -31.17 |
| chr16 | 88037122  | 88264888  | 227767  | -31.17 |
| chr16 | 86551307  | 87367104  | 815798  | -31.61 |
| chr9  | 129747250 | 129958181 | 210932  | -31.74 |
| chr18 | 7608523   | 8744382   | 1135860 | -31.80 |
| chr12 | 4942557   | 5478822   | 536266  | -31.97 |
| chr21 | 42513900  | 43528632  | 1014733 | -32.00 |
| chr11 | 61583397  | 62212488  | 629092  | -32.40 |
| chr20 | 14546905  | 16289848  | 1742944 | -32.44 |
| chr2  | 133081609 | 134898174 | 1816566 | -32.52 |
| chr14 | 25254211  | 25591332  | 337122  | -32.56 |
| chr10 | 105594236 | 106070523 | 476288  | -32.62 |
| chr20 | 48816911  | 49068197  | 251287  | -33.26 |
| chr3  | 139809844 | 140618582 | 808739  | -33.71 |
| chr4  | 152641023 | 153231947 | 590925  | -33.78 |
| chr3  | 64126214  | 65734423  | 1608210 | -33.93 |
| chr7  | 16768248  | 20394972  | 3626725 | -34.06 |
| chr2  | 218669154 | 218786460 | 117307  | -34.14 |
| chr3  | 16355369  | 18337076  | 1981708 | -34.24 |
| chr15 | 91849405  | 92727767  | 878363  | -34.25 |
| chr10 | 71256049  | 71676454  | 420406  | -34.83 |
| chr17 | 68651346  | 70731104  | 2079759 | -34.93 |
| chr2  | 220543732 | 222840241 | 2296510 | -35.29 |
| chr11 | 69259134  | 70364994  | 1105861 | -35.31 |
| chr2  | 16735506  | 17826729  | 1091224 | -35.34 |
| chr15 | 78944376  | 79922572  | 978197  | -35.39 |
| chr16 | 67575333  | 68102392  | 527060  | -35.47 |
| chr5  | 150027381 | 150554744 | 527364  | -35.66 |
| chr10 | 124047100 | 124423429 | 376330  | -35.77 |
| chr16 | 56970868  | 57668607  | 697740  | -36.01 |
| chr20 | 23615018  | 25021495  | 1406478 | -36.26 |
| chr6  | 164444508 | 166298113 | 1853606 | -36.45 |
| chr22 | 26849184  | 27635577  | 786394  | -37.37 |
| chr11 | 131787533 | 132592644 | 805112  | -37.43 |
| chr10 | 13937838  | 14651116  | 713279  | -37.54 |
| chr5  | 52463531  | 54060865  | 1597335 | -37.65 |
| chr12 | 3347229   | 3838556   | 491328  | -37.76 |
| chr4  | 13990496  | 15978707  | 1988212 | -37.94 |
| chr5  | 88009635  | 89432331  | 1422697 | -38.23 |
| chr20 | 38287285  | 39806889  | 1519605 | -38.37 |
| chr6  | 105811215 | 107397633 | 1586419 | -38.65 |
| chr5  | 148208019 | 148661992 | 453974  | -38.72 |
| chr5  | 162835563 | 167831807 | 4996245 | -38.97 |

|       |           |           |         |        |
|-------|-----------|-----------|---------|--------|
| chr9  | 70971163  | 72626682  | 1655520 | -39.71 |
| chr3  | 52486420  | 53835049  | 1348630 | -39.79 |
| chr13 | 101202242 | 107185843 | 5983602 | -40.37 |
| chr1  | 115610050 | 116742800 | 1132751 | -40.49 |
| chr1  | 110257298 | 110663189 | 405892  | -40.60 |
| chr15 | 70154300  | 70620853  | 466554  | -40.63 |
| chr5  | 8974441   | 10331133  | 1356693 | -40.88 |
| chr3  | 127472578 | 127998772 | 526195  | -41.61 |
| chr3  | 107429745 | 111480632 | 4050888 | -42.46 |
| chr3  | 44155540  | 45261003  | 1105464 | -43.26 |
| chr2  | 99528446  | 101359637 | 1831192 | -44.04 |
| chr5  | 1765162   | 7828979   | 6063818 | -44.14 |
| chr16 | 15905440  | 17577543  | 1672104 | -44.19 |
| chr1  | 176035845 | 178506994 | 2471150 | -44.33 |
| chr10 | 3012368   | 3823274   | 810907  | -45.05 |
| chr1  | 101088100 | 109842619 | 8754520 | -45.73 |
| chr9  | 18405088  | 20386786  | 1981699 | -46.25 |
| chr17 | 66755473  | 68401878  | 1646406 | -46.89 |
| chr20 | 20868934  | 22786337  | 1917404 | -49.15 |
| chr1  | 231727147 | 233181808 | 1454662 | -49.44 |
| chr14 | 72195072  | 74211522  | 2016451 | -52.11 |
| chr10 | 43800111  | 45375359  | 1575249 | -54.22 |
| chr8  | 131526451 | 134369056 | 2842606 | -55.15 |
| chr12 | 105351352 | 106961002 | 1609651 | -63.68 |
| chr1  | 55520673  | 57013577  | 1492905 | -68.70 |
| chr18 | 32171837  | 37333828  | 5161992 | -74.09 |

<sup>a</sup>Chromosome (hg19) on which a regional difference was identified.

<sup>b</sup>Chromosomal coordinates for the start of the observed regional difference.

<sup>c</sup>Chromosomal coordinates for the end of the observed regional difference.

<sup>d</sup>The total size (in basepairs) of the indicated region.

<sup>e</sup>The corrected log<sub>2</sub> fold change in MyoD peak heights between the primary and RD cells (for details, see Methods). Positive values represent higher RD peaks, and negative values higher primary cell peaks.

**Supplemental Table S7. Differentially expressed genes located in regions with regional MyoD ChIP-seq peak differences.**

| Entrez ID                                  | Gene Symbol | Myoblast value <sup>a</sup> | Myotube value <sup>b</sup> | RD value <sup>c</sup> | Prox Promoter Analysis <sup>d</sup> |
|--------------------------------------------|-------------|-----------------------------|----------------------------|-----------------------|-------------------------------------|
| <b>Higher MyoD region in primary cells</b> |             |                             |                            |                       |                                     |
| 845                                        | CASQ2       | 6.49                        | 13.80                      | 6.84                  | MT > RD                             |
| 8988                                       | HSPB3       | 8.40                        | 13.58                      | 7.71                  | MT > RD                             |
| 9891                                       | NUAK1       | 10.16                       | 12.77                      | 8.01                  | MT > RD                             |
| 5654                                       | HTRA1       | 13.14                       | 12.20                      | 6.78                  |                                     |
| 4208                                       | MEF2C       | 7.56                        | 11.80                      | 6.96                  | MT > RD                             |
| 2108                                       | ETFA        | 11.05                       | 11.49                      | 10.44                 |                                     |
| 25907                                      | TMEM158     | 11.79                       | 11.39                      | 9.95                  |                                     |
| 50863                                      | NTM         | 10.84                       | 11.05                      | 6.55                  |                                     |
| 80206                                      | FHOD3       | 7.82                        | 10.90                      | 6.21                  | MT > RD                             |
| 5239                                       | PGM5        | 6.53                        | 10.83                      | 6.76                  | MT > RD                             |
| 1316                                       | KLF6        | 11.81                       | 10.82                      | 9.51                  |                                     |
| 10468                                      | FST         | 9.35                        | 10.73                      | 6.30                  | MT > RD                             |
| 134265                                     | AFAP1L1     | 7.52                        | 10.72                      | 6.79                  | MT > RD                             |
| 8459                                       | TPST2       | 10.43                       | 10.59                      | 8.68                  |                                     |
| 22885                                      | ABLIM3      | 8.61                        | 10.55                      | 6.65                  | MT > RD                             |
| 1837                                       | DTNA        | 6.72                        | 10.49                      | 8.29                  | MT > RD                             |
| 23180                                      | RFTN1       | 11.03                       | 10.45                      | 8.45                  |                                     |
| 57214                                      | KIAA1199    | 9.00                        | 10.43                      | 6.71                  | MT > RD                             |
| 2495                                       | FTH1        | 9.41                        | 10.35                      | 7.97                  |                                     |
| 64084                                      | CLSTN2      | 6.40                        | 10.26                      | 6.64                  | MT > RD                             |
| 92912                                      | UBE2Q2      | 9.78                        | 10.06                      | 8.30                  |                                     |
| 166336                                     | PRICKLE2    | 8.51                        | 10.05                      | 7.12                  | MT > RD                             |
| 25945                                      | PVRL3       | 10.26                       | 10.01                      | 7.75                  |                                     |
| 9289                                       | GPR56       | 6.90                        | 10.00                      | 6.40                  | MT > RD                             |
| 55034                                      | MOCOS       | 8.28                        | 9.64                       | 6.62                  | MT > RD                             |
| 125476                                     | INO80C      | 9.31                        | 9.56                       | 8.50                  |                                     |
| 7145                                       | TNS1        | 8.17                        | 9.54                       | 7.59                  | MT > RD                             |
| 51105                                      | PHF20L1     | 9.21                        | 9.44                       | 7.92                  |                                     |
| 29091                                      | STXBP6      | 9.23                        | 9.35                       | 6.50                  |                                     |
| 641371                                     | ACOT1       | 8.20                        | 9.20                       | 7.87                  |                                     |
| 2073                                       | ERCC5       | 8.76                        | 9.12                       | 7.72                  |                                     |
| 54841                                      | BIVM        | 8.71                        | 9.09                       | 7.64                  |                                     |
| 57568                                      | SIPA1L2     | 6.47                        | 9.05                       | 8.46                  |                                     |
| 83641                                      | FAM107B     | 8.20                        | 8.90                       | 7.86                  |                                     |
| 56999                                      | ADAMTS9     | 6.42                        | 8.70                       | 6.35                  | MT > RD                             |
| 6560                                       | SLC12A4     | 7.96                        | 8.69                       | 7.38                  |                                     |
| 10531                                      | PITRM1      | 9.40                        | 8.58                       | 7.36                  |                                     |



|                                       |           |       |      |       |
|---------------------------------------|-----------|-------|------|-------|
| 5797                                  | PTPRM     | 7.84  | 8.56 | 6.70  |
| 25825                                 | BACE2     | 9.10  | 8.50 | 6.50  |
| 8613                                  | PPAP2B    | 10.10 | 8.41 | 6.47  |
| 1948                                  | EFNB2     | 10.25 | 8.41 | 6.38  |
| 28232                                 | SLCO3A1   | 7.42  | 8.36 | 6.55  |
| 389125                                | MUSTN1    | 6.69  | 8.33 | 6.98  |
| 84899                                 | TMTC4     | 7.41  | 8.24 | 6.99  |
| 113802                                | HENMT1    | 8.11  | 8.20 | 6.62  |
| 6387                                  | CXCL12    | 8.24  | 7.94 | 6.43  |
| 9935                                  | MAFB      | 6.38  | 7.59 | 6.40  |
| 10351                                 | ABCA8     | 7.26  | 7.48 | 6.46  |
| 1755                                  | DMBT1     | 8.35  | 7.46 | 6.24  |
| <b>Higher MyoD region in RD cells</b> |           |       |      |       |
| 1908                                  | EDN3      | 6.30  | 6.28 | 10.65 |
| 23266                                 | LPHN2     | 6.28  | 6.52 | 10.39 |
| 7852                                  | CXCR4     | 6.33  | 7.14 | 10.95 |
| 7991                                  | TUSC3     | 7.50  | 7.01 | 10.57 |
| 6335                                  | SCN9A     | 6.83  | 7.18 | 9.94  |
| 84141                                 | FAM176A   | 10.10 | 7.51 | 9.55  |
| 63939                                 | C20orf177 | 7.99  | 8.66 | 10.70 |
| 64093                                 | SMOC1     | 6.49  | 6.46 | 8.21  |
| 57419                                 | SLC24A3   | 6.43  | 6.42 | 7.94  |
| 5509                                  | PPP1R3D   | 7.15  | 6.83 | 8.22  |
| 2737                                  | GLI3      | 6.91  | 6.83 | 8.21  |
| 116154                                | PHACTR3   | 6.32  | 6.25 | 7.59  |
| 9844                                  | ELMO1     | 6.59  | 6.47 | 7.80  |

<sup>a</sup>Myoblast value lists the mean value from three biologically independent myoblast RNA samples.

<sup>b</sup>Myotube value lists the mean value from three primary human myotube RNA samples.

<sup>c</sup>RD value represents the mean value from three RD RNA samples.

<sup>d</sup>The designation of MT>RD indicates those members of this table that were also identified in the proximal promoter analysis as having higher MyoD peaks and gene expression in myotubes compared to RD cells.

**Supplemental Table S8. Clinical information for the primary rhabdomyosarcoma patient samples and Reduced Representation Bisulfite Sequencing at the CpG shore in the promoter of *JDP2*.**

| Sample                |                 | RRBS Reads <sup>a</sup> |                 |               |               |                |                |                 |
|-----------------------|-----------------|-------------------------|-----------------|---------------|---------------|----------------|----------------|-----------------|
| Primary Tumors        | Diagnosis       | Region 1 <sup>b,c</sup> |                 | Region 2      |               |                |                |                 |
|                       |                 | A                       | B               | A             | B             | C              | D              | E               |
| 1                     | ARMS            | 1/1                     | 1/1             | 0/1           | 1/1           | 0/1            | 1/1            | 0/1             |
| 2                     | ARMS            | 1/1                     | 1/1             | 1/1           | 1/1           | 1/1            | 1/1            | 1/1             |
| 3                     | ERMS (lung)     | 2/4                     | 4/4             | 0/4           | 0/4           | 2/4            | 0/4            | 4/4             |
| 4                     | ERMS            | 15/23; 9/9              | 19/21;<br>5/8   | 1/9; 3/21     | 4/21;<br>4/9  | 6/9;<br>8/21   | 10/21;<br>3/9  | 21/23;<br>7/15  |
| 5                     | ERMS            | 13/25; 5/5              | 15/23;<br>4/5   | 2/5; 9/23     | 8/23          | 7/23           | 9/23           | 23/29;<br>7/10  |
| 6                     | ARMS            | 19/23; 5/6              | 18/23;<br>4/4   | 17/23;<br>5/5 | 17/23;<br>5/5 | 18/23;<br>5/5  | 18/23;<br>5/5  | 21/26;<br>7/10  |
| 7                     | ERMS (botryoid) | 18/24; 4/4              | 17/23;<br>3/4   | 1/4;<br>10/24 | 1/4;<br>8/24  | 2/4;<br>9/24   | 15/24;<br>2/4  | 2/6;<br>24/27   |
| 8                     | ARMS            | 1/6                     | 3/6             | 2/6           | 1/6           | 0/6            | 5/6            | 5/6             |
| 9                     | ARMS            | 1/1; 5/5                | 5/5             | 0/1; 4/5      | 1/1; 3/5      | 1/1; 4/5       | 1/1; 5/5       | 0/1;<br>5/7     |
| 10                    | ARMS            | 1/5                     | 2/4             | 1/4           | 0/4           | 2/4            | 1/4            | 4/4             |
| 11                    | ARMS            | 1/1; 2/6                | 0/1;<br>2/4     | 0/4; 0/4      | 0/4; 0/4      | 0/4; 0/4       | 0/3; 0/4       | 0/3;<br>4/4     |
| 12                    | ERMS            | 48/66; 7/7              | 4/6;<br>56/65   | 1/7;<br>25/65 | 35/65;<br>5/7 | 36/65;<br>6/7  | 31/65;<br>5/7  | 10/16;<br>61/80 |
| 13                    | ERMS            | 21/34; 8/8              | 10/10;<br>27/33 | 6/11;<br>9/32 | 5/11;<br>7/33 | 10/33;<br>3/11 | 10/33;<br>6/11 | 30/37;<br>5/15  |
| <b>Cultured Cells</b> |                 |                         |                 |               |               |                |                |                 |
| RDs                   | N/A             | 3/3; 3/3                | 3/3;<br>3/3     | 3/3; 3/3      | 3/3; 3/3      | 3/3; 3/3       | 3/3; 3/3       | 4/4;<br>4/4     |
| Primary myotubes      | N/A             | 5/5; 8/41               | 1/6;<br>7/40    | 0/6; 3/40     | 0/6;<br>2/40  | 0/6;<br>3/40   | 0/5;<br>3/40   | 37/41;<br>4/8   |
| <b>Adult Muscle</b>   |                 |                         |                 |               |               |                |                |                 |
| Sample 1              | N/A             | 3/4; 6/28               | 1/4;<br>10/27   | 0/4; 2/27     | 1/27;<br>1/4  | 1/27;<br>1/4   | 0/27;<br>1/4   | 0/4;<br>24/27   |
| Sample 2              | N/A             | 3/3; 6/19               | 0/2;<br>8/19    | 0/3; 3/19     | 0/3;<br>3/19  | 0/3;<br>3/19   | 0/3;<br>4/19   | 19/21;<br>3/6   |

<sup>a</sup>The number of reads positive for methylation are represented as # methylated CpG reads/total # of reads for the indicated CpG.

<sup>b</sup>Fields with two fractions separated by a semicolon represent data from the positive (first value) and negative (second value) strands.

<sup>c</sup>The indicated regions and positions within the regions are as depicted in Figure 6.
